# Supplementary material for: Au nanoparticles decorated β-Bi2O3 as highly-sensitive SERS substrate for detection of methylene blue and methyl orange
Source: Royal Society of Chemistry journal article supplement (doi:10.1039/d4an00633j), 2024-01-01
Supplement: d4an00633j1.pdf [file d4an00633j1.pdf]

## Supplementary Information

# Au nanoparticles decorated $\beta$ -Bi<sub>2</sub>O<sub>3</sub> as highly-sensitive SERS substrate for detection of methylene blue and methyl orange

*Binbin Chen<sup>a,1</sup>, Lizhu Fan<sup>b,1</sup>, Viktoria Golovanova<sup>c</sup>, Chunyu Li<sup>f</sup>, Kaiwen Wang<sup>a</sup>, Jinshu Wang<sup>e</sup>, Dawei Pang<sup>a\*</sup>, Zhouhao Zhu<sup>d\*\*</sup>, Peijie Ma<sup>a\*\*\*</sup>*

<sup>a</sup> Beijing Key Lab of Microstructure and Property of Advanced Materials, College of Materials Science & Engineering, Beijing University of Technology, Beijing, 100124, China

<sup>b</sup> National Key Laboratory of Integrated Circuits and Microsystems, Chongqing, 401332, China

<sup>c</sup> South-Ukrainian National University, Staroportofrankovskaya Str. 26, 65008, Odessa, Ukraine

<sup>d</sup> College of Physics and Center of Quantum Materials and Devices, Chongqing University, Chongqing, 401331, China

<sup>e</sup> School of Public Health and Health Sciences, Tianjin University of Traditional Chinese Medicine, Tianjin 301617, China

<sup>f</sup> Institute of Physical Chemistry, Friedrich Schiller University Jena, Helmholtzweg 4, 07743, Jena, Germany

\* Corresponding author.

\*\* Corresponding author.

\*\*\* Corresponding author.

*E-mail addresses:* gavinpang@bjut.edu.cn (D. Pang), zhuzhouhao98@foxmail.com (Z. Zhu), peijiema@bjut.edu.cn (P. Ma).

<sup>1</sup> These authors contributed equally to this work.

### Calculation of enhancement factors (EF)

Enhancement Factor (EF), as an important parameter, is evaluated to quantify the enhancement effect of a substrate using the following formula [1]:

$$EF = \frac{I_S N_{bulk}}{I_R N_{surf}} \quad \text{Eq. (1)}$$

In the equation,  $I_S$  and  $I_R$  represent the Raman signal intensities of the molecule MB with and without the presence of the SERS-enhancing substrate, respectively.  $N_{bulk}$  is the average number of MB molecules detected in the absence of SERS measurements, and  $N_{surf}$  is the average number of MB molecules detected in SERS measurements. The calculation method for  $N_{bulk}$  is as follows:

$$N_{bulk} = \frac{A_{laser} \times h \times \rho}{M} \times N_A \quad \text{Eq. (2)}$$

In the equation,  $A_{laser}$ ,  $h$ ,  $\rho$ , and  $M$  represent the laser spot area, focal length, density of the solid analyte, and relative molecular mass, respectively.  $N_A$  refers to Avogadro's number. The calculation for  $N_{surface}$  is as follows:

$$N_{surface} = \frac{C \times V}{A_{substrate}} \times N_A \times A_{laser} \quad \text{Eq. (3)}$$

In the equation,  $C$ ,  $V$ , and  $A_{substrate}$  represent the concentration, volume of the analyte solution, and substrate area, respectively.  $N_A$  refers to Avogadro's number, and  $A_{laser}$  represents the area of the laser spot.

Therefore, EF can be calculated as follows:

$$EF = \frac{I_S}{I_R} \times \frac{N_{bulk}}{N_{surf}} = \frac{I_S}{I_R} \times \frac{h \times \rho \times A_{substrate}}{M \times C \times V} \quad \text{Eq. (4)}$$

EF calculations for MB:

For  $\beta$ - $\text{Bi}_2\text{O}_3$  substrate,  $I_R = 1523$  (a.u.),  $h = 0.2$  (mm),  $\rho = 0.6$  ( $\text{g}/\text{cm}^3$ ),  $M = 356$  ( $\text{g}/\text{mol}$ ),  $A_{substrate} = 4$  ( $\text{mm}^2$ ),  $V = 10$  ( $\mu\text{L}$ ),  $C = 10^{-7}$  M, and  $I_S = 1986$  (a.u.) (at  $1624 \text{ cm}^{-1}$ ), the EF is estimated to be  $3.94 \times 10^6$ .

For 5.20% $\text{Au}/\text{Bi}_2\text{O}_3$  sample,  $I_R = 1523$  (a.u.),  $h = 0.2$  (mm),  $\rho = 0.6$  ( $\text{g}/\text{cm}^3$ ),  $M = 356$  ( $\text{g}/\text{mol}$ ),  $A_{substrate} = 4$  ( $\text{mm}^2$ ),  $V = 10$  ( $\mu\text{L}$ ),  $C = 10^{-7}$  M, and  $I_S = 4649$  (a.u.) (at  $1624 \text{ cm}^{-1}$ ), the EF is estimated to be  $9.22 \times 10^6$ .

The calculation for MO is similar to that for MB, and it is calculated:

For  $\beta$ - $\text{Bi}_2\text{O}_3$  sample, EF is estimated to be  $2.96 \times 10^4$ .

For 5.20% $\text{Au}/\text{Bi}_2\text{O}_3$  sample, EF is estimated to be  $1.15 \times 10^5$ .

### ***Calculation of mass fractions from ICP-AES***

A 150mg powder sample of 5.20%Au/Bi<sub>2</sub>O<sub>3</sub> was taken and dissolved in 4mL aqua regia. The solution was then diluted with distilled water to a final volume of 15mL. Subsequently, it was further diluted 1000 times. The measurement results using ICP-AES showed that the concentration of Au was 0.520mg/L, which corresponds to a mass of 7.8mg of Au ( $m = C \times V = 7.8\text{mg}$ ). The mass fraction of Au was calculated as  $\omega = m/m_0 = 5.20\%$ . Similarly, when 2.80%Au/Bi<sub>2</sub>O<sub>3</sub> and 10.1%Au/Bi<sub>2</sub>O<sub>3</sub> samples were processed using the same method and their Au contents were measured, the respective concentrations were found to be 0.280mg/L and 1.010mg/L. This resulted in mass fractions of Au of 2.80% and 10.1% for 2.80%Au/Bi<sub>2</sub>O<sub>3</sub> and 10.1%Au/Bi<sub>2</sub>O<sub>3</sub>, respectively.

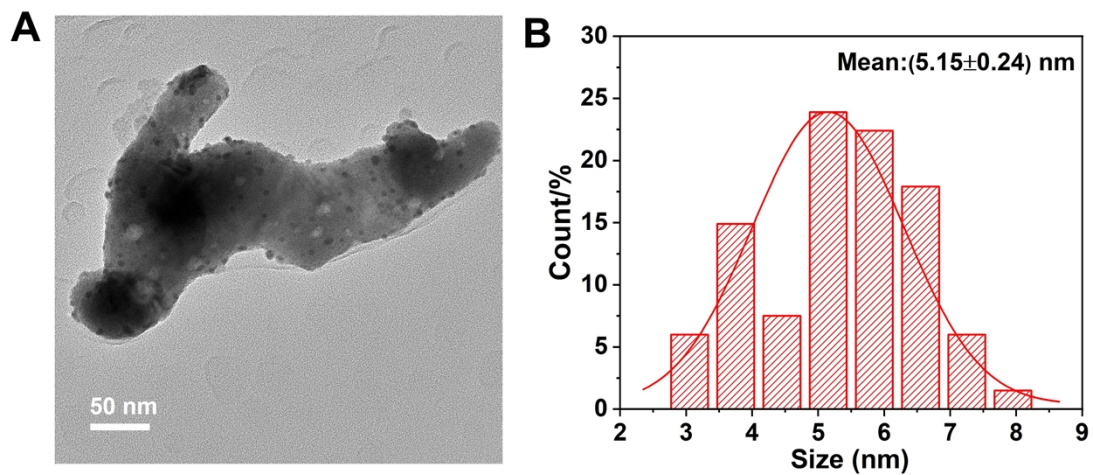

**Fig. S1** Size distribution histograms of Au NPs on 5.20%Au/Bi<sub>2</sub>O<sub>3</sub>.

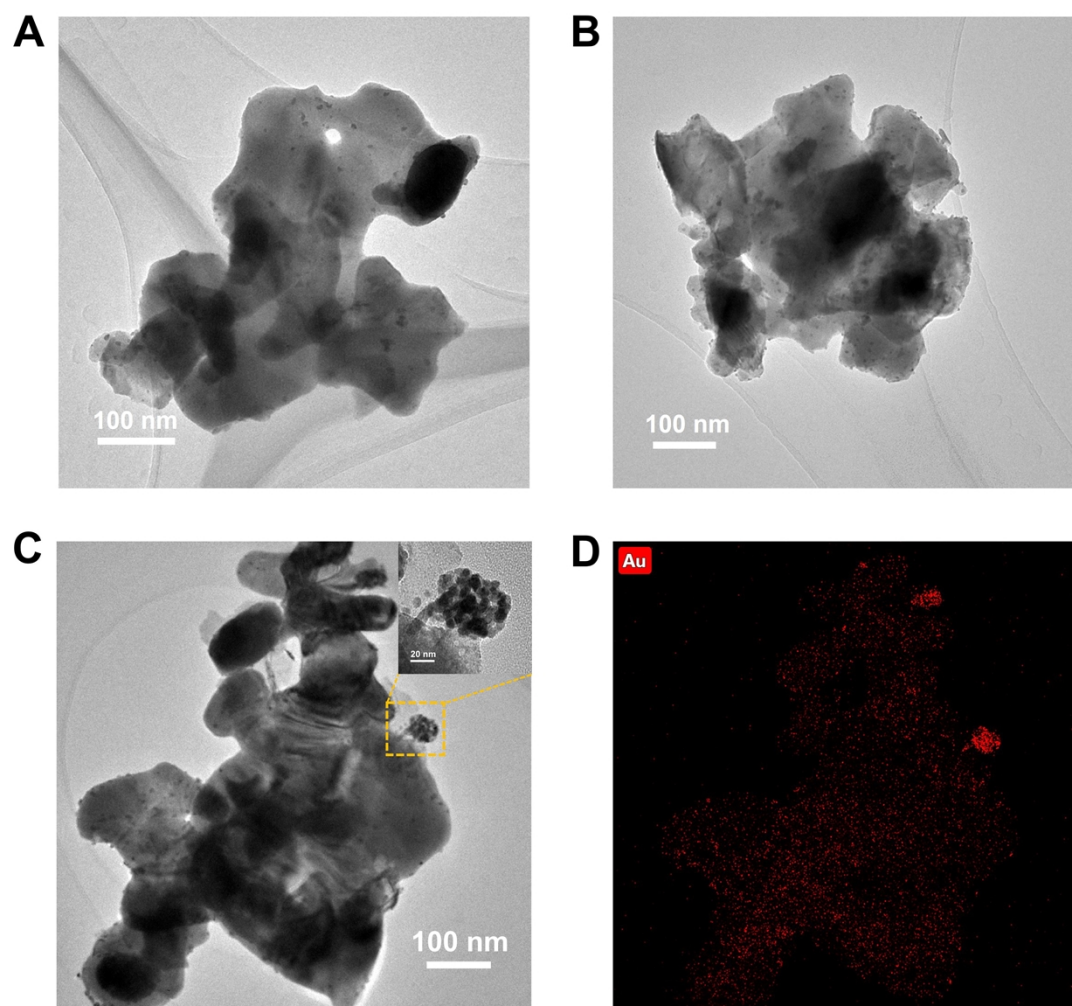

**Fig. S2** TEM images of (A) 2.80%Au/Bi<sub>2</sub>O<sub>3</sub>, (B) 5.20%Au/Bi<sub>2</sub>O<sub>3</sub> and (C) 10.1%Au/Bi<sub>2</sub>O<sub>3</sub> (Insert is an enlarged view of the dotted box in (C)). (D) Elemental mapping image of Au of 10.1%Au/Bi<sub>2</sub>O<sub>3</sub>.

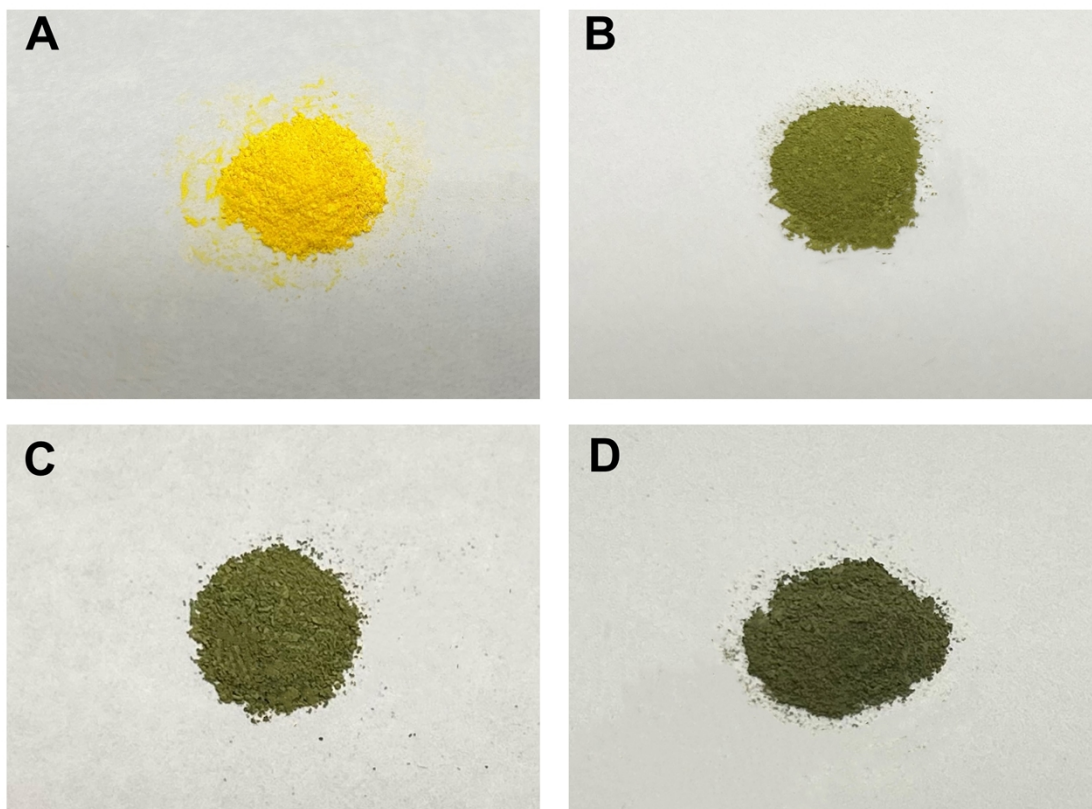

**Fig. S3** Photos taken by iphone of (A)  $\beta$ - $\text{Bi}_2\text{O}_3$ , (B) 2.80% $\text{Au}/\text{Bi}_2\text{O}_3$ , (C) 5.20% $\text{Au}/\text{Bi}_2\text{O}_3$  and (D) 10.1% $\text{Au}/\text{Bi}_2\text{O}_3$ .

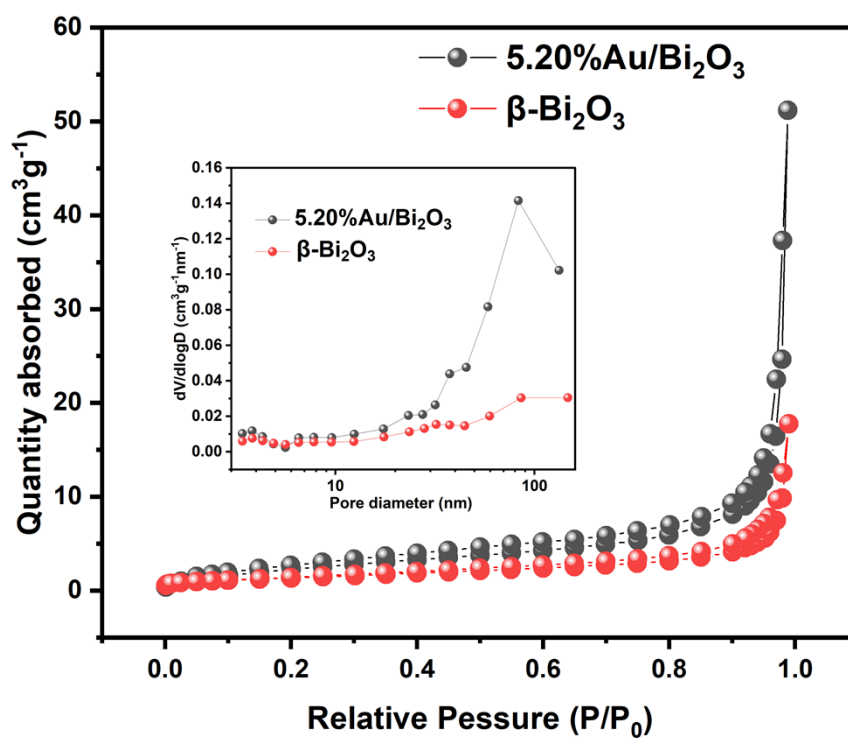

**Fig. S4** Nitrogen adsorption-desorption isotherms of  $\beta$ - $\text{Bi}_2\text{O}_3$  and 5.20% $\text{Au}/\text{Bi}_2\text{O}_3$  (The

inset is pore-size distributions).

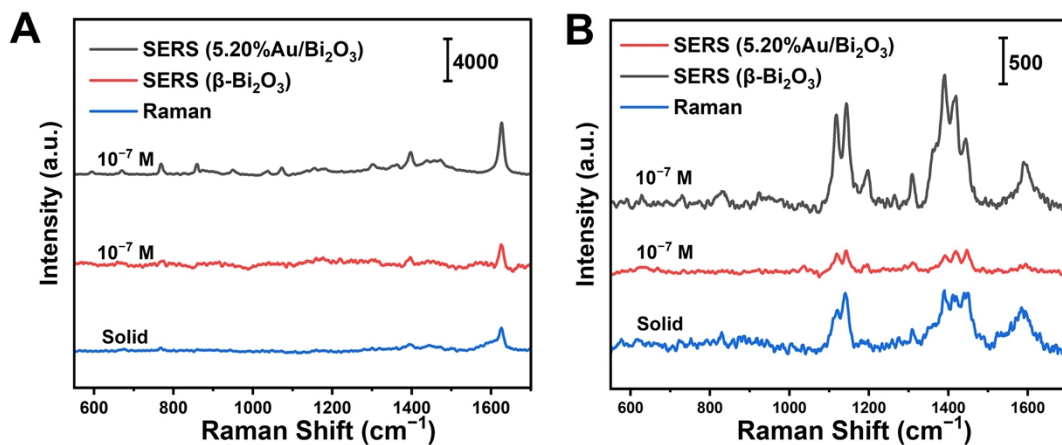

**Fig. S5** Normal Raman spectra and SERS spectra of (A) MB and (B) MO.

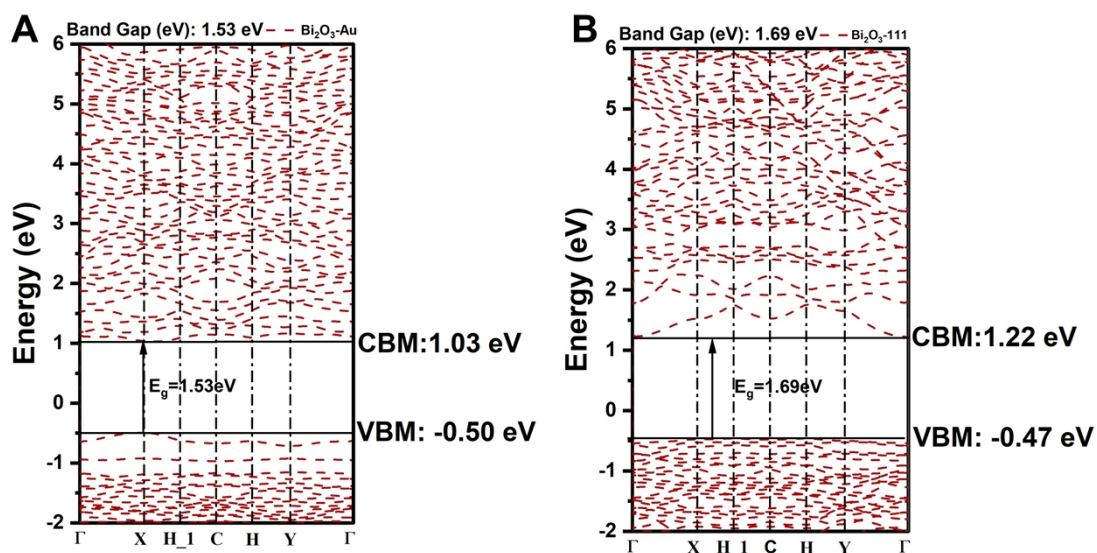

**Fig. S6** Calculated band structures of (A) 5.20%Au/Bi<sub>2</sub>O<sub>3</sub> and (B) β-Bi<sub>2</sub>O<sub>3</sub>.



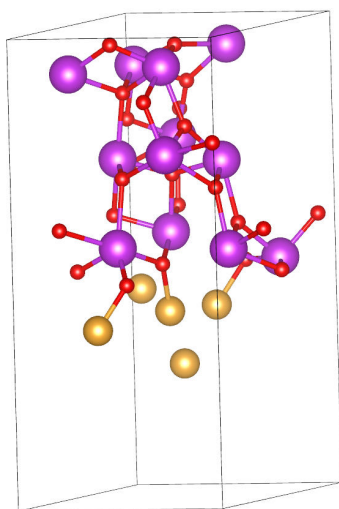

**Fig. S7** Optimized model of 5.20%Au/Bi<sub>2</sub>O<sub>3</sub> based on DFT calculation results.

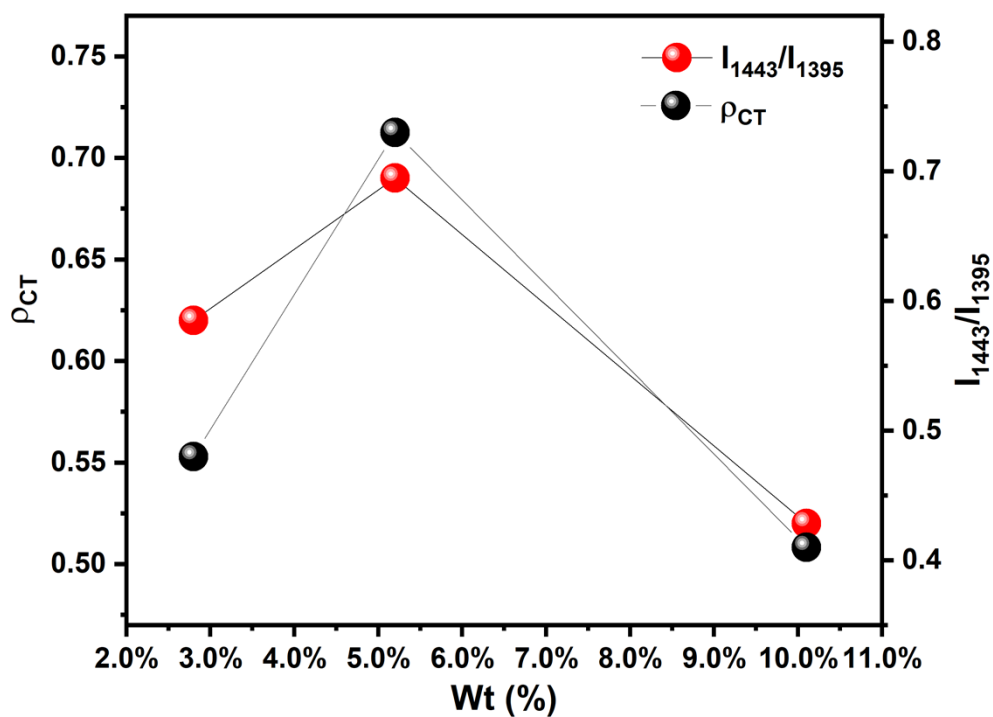

**Fig. S8** Degree of charge transfer ( $\rho_{CT}$ ) in the composites and the SERS intensity ratio between the modes at 1443 cm<sup>-1</sup> (b<sub>2</sub>) and 1395cm<sup>-1</sup> (a<sub>1</sub>) as a function of the load mass of Au NPs on  $\beta$ -Bi<sub>2</sub>O<sub>3</sub>.

**Table S1.** Mode assignment of the Raman peaks for MB.[2,3]

| <b>Normal Raman (cm<sup>-1</sup>)</b> | <b>SERS (cm<sup>-1</sup>)</b> | <b>Mode assignment</b>    |
|---------------------------------------|-------------------------------|---------------------------|
| <b>503</b>                            | 594                           | $\delta$ (C-S-C)          |
|                                       | 669                           | $\beta$ (C-H)             |
| <b>776</b>                            | 769                           | $\beta$ (C-H)             |
| <b>862</b>                            | 858                           | $\beta$ (C-H)             |
|                                       | 899                           | $\beta$ (C-H)             |
| <b>951</b>                            | 950                           | $\beta$ (C-H)             |
| <b>1036</b>                           | 1038                          | $\beta$ (C-H)             |
| <b>1073</b>                           | 1071                          | $\beta$ (C-H)             |
|                                       | 1153                          | $\beta$ (C-H)             |
|                                       | 1179                          | $\nu$ (C-N)               |
| <b>1305</b>                           | 1300                          | $\alpha$ (C-H)            |
| <b>1398</b>                           | 1395                          | $\nu_{\text{sym}}$ (C-N)  |
| <b>1437</b>                           | 1443                          | $\nu_{\text{asym}}$ (C-N) |
| <b>1474</b>                           | 1468                          | $\nu_{\text{asym}}$ (C-N) |
| <b>1625</b>                           | 1624                          | $\nu$ (C-C)               |

$\nu$ =stretching,  $\alpha$ = ring deformation,  $\beta$ =bending and  $\delta$ =skeletal deformation.



**Table S2.** Mode assignment of the Raman peaks for MO.[4]

| <b>Normal Raman (cm<sup>-1</sup>)</b> | <b>SERS (cm<sup>-1</sup>)</b> | <b>Peak assignment</b>                                    |
|---------------------------------------|-------------------------------|-----------------------------------------------------------|
| <b>828</b>                            | 831                           | $\beta(\text{C-H}) + \beta(\text{C-C}) + \nu(\text{C-C})$ |
| <b>921</b>                            | 925                           | $\nu(\text{C-C})$                                         |
| <b>1026</b>                           | 1025                          | $\beta(\text{C-C})$                                       |
| <b>1122</b>                           | 1112                          | $\beta(\text{C-C})$                                       |
| <b>1143</b>                           | 1144                          | $\beta(\text{C-C}) + \nu(\text{C-C}) + \beta(\text{C-N})$ |
| <b>1194</b>                           | 1196                          | $\nu(\text{C-C}) + \beta(\text{C-C}) + \beta(\text{C-H})$ |
| <b>1311</b>                           | 1313                          | $\nu(\text{C-C}) + \beta(\text{C-H})$                     |
| <b>1362</b>                           | 1364                          | $\nu(\text{C-C})$                                         |
| <b>1396</b>                           | 1389                          | $\nu(\text{N-N}) +$                                       |
| <b>1413</b>                           | 1410                          | $\nu(\text{N-N})$                                         |
| <b>1422</b>                           | 1422                          | $\nu(\text{C-C})$                                         |
| <b>1442</b>                           | 1444                          | $\nu(\text{C-C}) + \beta(\text{C-H})$                     |
| <b>1590</b>                           | 1589                          | $\nu(\text{C=C}) + \beta(\text{C=C})$                     |

$\nu$ =stretching and  $\beta$ =bending.

**Table S3.** Performance comparison of SERS semiconductor materials for the detection of MB.

| Materials                                       | Analyte molecules | LOD(M)                | EF                      |           |
|-------------------------------------------------|-------------------|-----------------------|-------------------------|-----------|
| MoO <sub>2</sub> /GO                            | MB                | 10 <sup>-8</sup>      | /                       | 1         |
| S-MoO <sub>2</sub>                              | MB                | 10 <sup>-8</sup>      | /                       | 2         |
| TiO <sub>2</sub> -PCC                           | MB                | 7.21×10 <sup>-8</sup> | 3.63 × 10 <sup>4</sup>  | 3         |
| CdSe-TiO <sub>2</sub> IOS                       | MB                | 7×10 <sup>-9</sup>    | 1.46 × 10 <sup>5</sup>  | 4         |
| F <sub>4</sub> TCNQ/MoS <sub>2</sub>            | MB                | 10 <sup>-10</sup>     | 2.531 × 10 <sup>6</sup> | 5         |
| MoO <sub>3</sub> /MoO <sub>2</sub>              | MB                | 10 <sup>-9</sup>      | 1.4 × 10 <sup>5</sup>   | 6         |
| SnS <sub>2</sub>                                | MB                | 10 <sup>-13</sup>     | 3.0 × 10 <sup>8</sup>   | 7         |
| Mo <sub>1-x</sub> W <sub>x</sub> S <sub>2</sub> | MB                | 10 <sup>-8</sup>      | /                       | 8         |
| β-Bi <sub>2</sub> O <sub>3</sub>                | MB                | 10 <sup>-9</sup>      | 5.5 × 10 <sup>6</sup>   | this work |

1 molybdenum oxide and graphene oxide nanocomposite.[5]

2 sulfur-doped MoO<sub>2</sub> nanospheres.[6]

3 TiO<sub>2</sub>-coated photonic crystal capillary.[7]

4 CdSe-sensitized TiO<sub>2</sub> composite film with inverse opal structure.[8]

5 F<sub>4</sub>TCNQ nanostructures grown on a 2D MoS<sub>2</sub> flake.[9]

6 MoO<sub>3</sub>/MoO<sub>2</sub> nanosheets.[10]

7 SnS<sub>2</sub> microspheres.[11]

8 Mo<sub>1-x</sub>W<sub>x</sub>S<sub>2</sub> nanosheets.

**Table S4.** Performance comparison of SERS noble metal loaded composites for the detection of MB.

| <b>Materials</b>                      | <b>Noble metal(wt%)</b> | <b>Analyte molecules</b> | <b>LOD(M)</b>     | <b>EF</b>              |           |
|---------------------------------------|-------------------------|--------------------------|-------------------|------------------------|-----------|
| AgNPs@g-C <sub>3</sub> N <sub>4</sub> | 2.36%                   | MB                       | 10 <sup>-12</sup> | 1.4 × 10 <sup>8</sup>  | 1         |
| Fe <sub>3</sub> O <sub>4</sub> /GO/Ag | 6.90%                   | MB                       | 10 <sup>-9</sup>  | /                      | 2         |
| AgNPs/GO/g-CN                         | 10.70%                  | MB                       | 10 <sup>-12</sup> | 6.59 × 10 <sup>8</sup> | 3         |
| CNF- Cu <sub>2</sub> O/Ag             | 13.07%                  | MB                       | 10 <sup>-8</sup>  | 4.0 × 10 <sup>4</sup>  | 4         |
| Ag/GO                                 | 30.84                   | MB                       | 10 <sup>-10</sup> | /                      | 5         |
| ZnO/Ag                                | 39.14%                  | MB                       | 10 <sup>-9</sup>  | 6.2 × 10 <sup>6</sup>  | 6         |
| Ag@Hct                                | 50.89%                  | MB                       | 10 <sup>-12</sup> | 2.6 × 10 <sup>4</sup>  | 7         |
| MNPs-MoS <sub>2</sub> @Au             | 68.84%                  | MB                       | 10 <sup>-9</sup>  | /                      | 8         |
| Au/Bi <sub>2</sub> O <sub>3</sub>     | 5.20%                   | MB                       | 10 <sup>-11</sup> | 9.2 × 10 <sup>6</sup>  | this work |

1 Ag nanoparticles/g-C<sub>3</sub>N<sub>4</sub>. [12]

2 Fe<sub>3</sub>O<sub>4</sub>/GO/Ag composite microspheres. [13]

3 Ag nanoparticles /GO/g-CN nanohybrids. [14]

4 Cu<sub>2</sub>O/Ag heterostructures within the cellulose nanofibrils (CNFs) network. [15]

5 Ag nanocubes/GO composites. [16]

6 ZnO nanoplates/Ag nanoparticles. [17]

7 spherical Ag/synthetic hectorite(Hct) nanomaterials. [18]

8 gold nanoparticles (AuNPs) grown on a magnetic sphere (MNPs)-MoS<sub>2</sub> microflower composite. [19]

**Table S5. Peak fitting table of O 1s in Bi<sub>2</sub>O<sub>3</sub>.**

| Name       | Peak BE | Height<br>CPS | Height<br>Ratio | Area<br>CPS.eV | Area<br>Ratio | FWHM fit<br>param (eV) | L/G<br>Mix(%)<br>Product | Tail<br>Mix (%) | Tail Height<br>(%) | Tail<br>Exponent |
|------------|---------|---------------|-----------------|----------------|---------------|------------------------|--------------------------|-----------------|--------------------|------------------|
| O1s Scan A | 529.52  | 20164.61      | 0.95            | 53366.17       | 0.73          | 1.9<br>0.5 : 3.5       | 91.6                     | 100             | 0                  | 19.3813          |
| O1s Scan B | 531.01  | 21716.06      | 1               | 48777.45       | 1             | 1.44<br>0.5 : 3.5      | 1.11                     | 100             | 0                  | 19.6366          |

**Table S6. Peak fitting table of O 1s in 5.20%Au/Bi<sub>2</sub>O<sub>3</sub>.**

| Name       | Peak BE | Height<br>CPS | Height<br>Ratio | Area<br>CPS.eV | Area<br>Ratio | FWHM fit<br>param (eV) | L/G<br>Mix(%)<br>Product | Tail<br>Mix (%) | Tail Height<br>(%) | Tail<br>Exponent |
|------------|---------|---------------|-----------------|----------------|---------------|------------------------|--------------------------|-----------------|--------------------|------------------|
| O1s Scan A | 529.55  | 40164.61      | 1               | 95085.96       | 1             | 1.9<br>0.5 : 3.5       | 0                        | 0               | 100                | 0.0551           |
| O1s Scan B | 530.76  | 13716.06      | 0.34            | 41931.1        | 0.44          | 1.87<br>0.5 : 3.5      | 75.26                    | 2.59            | 97.50              | 0.0389           |

## Reference

- [1] E.C. Le Ru, E. Blackie, M. Meyer, P.G. Etchegoin, Surface Enhanced Raman Scattering Enhancement Factors: A Comprehensive Study, *J. Phys. Chem. C* 111 (2007) 13794–13803. <https://doi.org/10.1021/jp0687908>.
- [2] G.-N. Xiao, S.-Q. Man, Surface-enhanced Raman scattering of methylene blue adsorbed on cap-shaped silver nanoparticles, *Chem. Phys. Lett.* 447 (2007) 305–309. <https://doi.org/10.1016/j.cplett.2007.09.045>.
- [3] C. Li, Y. Huang, K. Lai, B.A. Rasco, Y. Fan, Analysis of trace methylene blue in fish muscles using ultra-sensitive surface-enhanced Raman spectroscopy, *Food Control* 65 (2016) 99–105. <https://doi.org/10.1016/j.foodcont.2016.01.017>.
- [4] O. Prakash, S. Kumar, P. Singh, V. Deckert, S. Chatterjee, A.K. Ghosh, R.K. Singh, Surface-enhanced Raman scattering characteristics of CuO : Mn/Ag heterojunction probed by methyl orange: effect of Mn<sup>2+</sup> doping, *J. Raman Spectrosc.* 47 (2016) 813–818. <https://doi.org/10.1002/jrs.4904>.
- [5] J. Chen, K. Sun, Y. Zhang, D. Wu, Z. Jin, F. Xie, X. Zhao, X. Wang, Plasmonic MoO<sub>2</sub> nanospheres assembled on graphene oxide for highly sensitive SERS detection of organic pollutants, *Anal. Bioanal. Chem.* 411 (2019) 2781–2791. <https://doi.org/10.1007/s00216-019-01751-z>.
- [6] X. Zhou, X. Zhao, S. Gu, F. Xie, X. Wang, Z. Tang, Sulfur doped MoO<sub>2</sub> hollow nanospheres as a highly sensitive SERS substrate for multiple detections of organic pollutants, *Anal. Methods* 13 (2021) 2679–2687. <https://doi.org/10.1039/D1AY00502B>.

- [7] X. Wang, J. Li, X. Gao, Y. Shen, A. Xie, Ordered CdSe-sensitized TiO<sub>2</sub> inverse opal film as multifunctional surface-enhanced Raman scattering substrate, *Appl. Surf. Sci.* 463 (2019) 357–362. <https://doi.org/10.1016/j.apsusc.2018.08.216>.
- [8] B. Liu, K. Wang, B. Gao, J. Lu, H. Li, X. Zhao, TiO<sub>2</sub>-Coated Silica Photonic Crystal Capillaries for Plasmon-Free SERS Analysis, *ACS Appl. Nano Mater.* 2 (2019) 3177–3186. <https://doi.org/10.1021/acsanm.9b00492>.
- [9] M. Liu, W. Liu, W. Zhang, P. Duan, M. Shafi, C. Zhang, X. Hu, G. Wang, W. Zhang,  $\pi$ -Conjugated Small Organic Molecule-Modified 2D MoS<sub>2</sub> with a Charge-Localization Effect Enabling Direct and Sensitive SERS Detection, *ACS Appl. Mater. Interfaces* 14 (2022) 56975–56985. <https://doi.org/10.1021/acsami.2c17277>.
- [10] P. Ren, W. Zhou, X. Ren, X. Zhang, B. Sun, Y. Chen, Q. Zheng, J. Li, W. Zhang, Improved surface-enhanced Raman scattering (SERS) sensitivity to molybdenum oxide nanosheets via the lightning rod effect with application in detecting methylene blue, *Nanotechnology* 31 (2020) 224002. <https://doi.org/10.1088/1361-6528/ab758b>.
- [11] Y. Peng, C. Lin, Y. Li, Y. Gao, J. Wang, J. He, Z. Huang, J. Liu, X. Luo, Y. Yang, Identifying infectiousness of SARS-CoV-2 by ultra-sensitive SnS<sub>2</sub> SERS biosensors with capillary effect, *Matter* 5 (2022) 694–709. <https://doi.org/10.1016/j.matt.2021.11.028>.
- [12] S. Li, P. Liang, Q. Chen, B. Sun, Z. Shang, J. Huang, M. Zou, X. Qi, J. Wu, One-pot fabrication of Mo<sub>1-x</sub>W<sub>x</sub>S<sub>2</sub> alloy nanosheets as SERS substrates with highly Raman enhancement effect and long-term stability, *Spectrochim. Acta. A. Mol. Biomol. Spectrosc.* 279 (2022) 121465. <https://doi.org/10.1016/j.saa.2022.121465>.

[13] J. He, G. Song, X. Wang, L. Zhou, J. Li, Multifunctional magnetic Fe<sub>3</sub>O<sub>4</sub>/GO/Ag composite microspheres for SERS detection and catalytic degradation of methylene blue and ciprofloxacin, *J. Alloys Compd.* 893 (2022) 162226. <https://doi.org/10.1016/j.jallcom.2021.162226>.

[14] S. Santhoshkumar, E. Murugan, Rationally designed SERS AgNPs/GO/g-CN nanohybrids to detect methylene blue and Hg<sup>2+</sup> ions in aqueous solution, *Appl. Surf. Sci.* 553 (2021) 149544. <https://doi.org/10.1016/j.apsusc.2021.149544>.

[15] Y. Luo, L. Xing, C. Hu, W. Zhang, X. Lin, J. Gu, Facile synthesis of nanocellulose-based Cu<sub>2</sub>O/Ag heterostructure as a surface-enhanced Raman scattering substrate for trace dye detection, *Int. J. Biol. Macromol.* 205 (2022) 366–375. <https://doi.org/10.1016/j.ijbiomac.2022.02.102>.

[16] J. He, X. Li, J. Li, Facile construction of silver nanocubes/graphene oxide composites for highly sensitive SERS detection of multiple organic contaminants by a portable Raman spectrometer, *J. Environ. Chem. Eng.* 10 (2022) 108278. <https://doi.org/10.1016/j.jece.2022.108278>.

[17] T.T.H. Pham, X.H. Vu, N.D. Dien, T.T. Trang, T.T.K. Chi, P.H. Phuong, N.T. Nghia, Ag nanoparticles on ZnO nanoplates as a hybrid SERS-active substrate for trace detection of methylene blue, *RSC Adv.* 12 (2022) 7850–7863. <https://doi.org/10.1039/D2RA00620K>.

[18] C.P. Fu, K.J. Li, J.Y. He, W.H. Yu, C.H. Zhou, Controlled fabrication of Ag@clay nanomaterials for ultrasensitive and rapid surface-enhanced Raman spectroscopic detection, *Anal. Methods* 15 (2023) 1001–1015. <https://doi.org/10.1039/D2AY01262F>.



[19] H. Lai, G. Ma, W. Shang, D. Chen, Y. Yun, X. Peng, F. Xu, Multifunctional magnetic sphere-MoS<sub>2</sub>@Au hybrid for surface-enhanced Raman scattering detection and visible light photo-Fenton degradation of aromatic dyes, *Chemosphere* 223 (2019) 465–473. <https://doi.org/10.1016/j.chemosphere.2019.02.073>.
