# Supplementary material for: Au nanoparticles decorated β-Bi2O3 as highly-sensitive SERS substrate for detection of methylene blue and methyl orange
Source: Royal Society of Chemistry journal article supplement (doi:10.1039/d4an00633j), 2024-01-01
Supplement: d4an00633j2.zip [file d4an00633j2.zip]

## Sheet: Sheet1
1714.03	-32.1674	-29.6321	22.4938	-92.9991	0	-2.05194	-61.9363	24.9382	11.9292	53.673	85.0918	18.2069	0	107.944	-40.7475	-21.4134	-21.4134	0	-37.9468	11.817	4.2804
1712.96	13.3906	-1.27226	-26.7695	-140.483	-3.25338	1.65037	-56.7112	-2.57254	18.7709	57.8426	75.3517	26.2186	-12.8744	109.616	-26.2783	-36.9791	-36.9791	-19.6845	5.97638	-34.1168	-31.6166
1711.9	6.11322	37.6275	11.7155	-97.8761	9.41184	41.1005	-52.728	-26.2626	24.6016	60.9222	67.3836	32.3082	-25.9394	111.472	-14.4752	-26.2008	-26.2008	1.45997	2.98782	-11.5514	-59.4675
1710.84	-22.2862	-6.93391	0	0	36.3918	0	-49.9865	-46.132	29.4213	62.9118	61.1877	36.4757	18.908	113.512	-5.33811	0	0	-2.35388	0	0	-79.2721
1709.78	-8.43479	0	21.2166	-51.5151	29.6144	9.76887	-48.4868	-62.1808	33.2298	63.8113	56.7639	38.7211	-59.294	115.735	1.13294	11.8694	11.8694	6.30661	12.5497	12.9215	-91.0307
1708.71	5.41195	-0.16799	-7.74294	-135.938	23.8616	29.0689	-48.229	-74.4089	36.0274	63.6208	54.1122	39.0444	-18.0748	118.142	4.93793	-2.70107	-2.70107	6.0562	2.39092	9.33585	-94.743
1707.65	26.2913	-32.2781	32.2786	-35.7544	-0.29084	10.2327	-68.7155	-88.4821	14.2731	60.3586	60.3882	19.7182	-11.2351	116.362	14.8811	8.06342	8.06342	27.181	34.0521	11.2514	-74.427
1706.59	-12.6471	13.6899	-20.1834	-79.0088	9.29448	-18.1288	-67.4488	-104.379	49.4388	59.654	66.8582	11.9171	29.9609	115.119	5.5527	-27.4231	-27.4231	14.4599	15.5301	-0.583	-75.9337
1705.52	-9.36059	6.42358	22.9598	-27.0551	63.8421	0.1063	-65.0034	-84.5644	57.5724	64.7897	57.3191	-0.69144	15.0928	141.537	2.96454	-13.3555	-13.3555	35.5757	36.4284	16.4527	-74.8417
1704.46	-16.6262	-22.124	6.55152	-52.6703	24.3675	26.8023	-57.8348	-85.3107	67.0717	76.5575	59.6479	1.84142	9.26816	170.745	-4.29012	-15.8041	-15.8041	-30.5535	60.9009	43.1014	-35.6264
1703.39	-22.1311	-8.10192	8.94591	-139.368	-94.7781	1.62679	-78.8326	-95.7719	52.6297	70.2839	26.883	20.0167	10.675	168.877	-11.3487	19.1664	19.1664	26.1634	-20.8954	13.4037	-69.4604
1702.33	-6.53955	5.91535	-1.18902	-53.3667	26.1501	27.2553	-48.4823	-78.9151	63.3882	77.4172	-2.74635	10.4337	-31.2893	171.54	-11.7518	-11.8962	-11.8962	38.3672	-11.9398	-20.4047	-53.9685
1701.27	-13.8021	27.0184	13.7325	-113.023	-4.10723	-25.4212	-68.4857	-42.8849	49.8716	78.5368	-0.10159	36.3009	0.83943	125.899	-23.5603	-23.1455	-23.1455	25.6544	22.0757	-67.9387	-64.3543
1700.2	-45.6647	-12.1477	6.72985	-102.204	-35.3755	-36.8235	-91.5668	-31.0324	44.2028	74.7038	16.5785	32.529	47.4088	104.241	-24.3974	-23.3912	-23.3912	-8.40349	-15.5196	-24.8149	-90.2684
1699.14	-24.8063	-8.77011	-23.7522	-78.4745	25.2457	-35.5311	-120.039	-29.0865	54.7432	85.2998	27.3747	44.5007	-18.0216	105.08	-49.1908	1.65769	1.65769	-12.21	6.55263	-42.1247	-123.103
1698.07	-18.009	-16.0244	8.38059	-71.1879	-20.3074	-22.6061	-109.817	-36.3445	39.1947	108.427	30.6773	42.1337	-16.6122	84.2787	-46.7197	-35.9786	-35.9786	24.8903	35.7748	-49.8177	-138.434
1697.01	-44.5854	-21.5047	-6.44242	-121.41	38.2489	12.5175	-107.606	-13.9072	23.1741	100.892	35.1513	70.4594	-24.2312	61.3395	-45.4196	-21.9301	-21.9301	-28.7103	32.7839	-57.5083	-130.27
1695.94	-4.42182	-5.72922	3.77092	-128.198	-49.1261	-21.0855	-121.698	-18.1619	63.892	92.572	39.8782	62.1978	-86.005	46.0767	-41.5809	8.60115	8.60115	-41.401	30.9857	-32.26	-133.41
1694.88	-9.92226	-12.9805	-17.3038	-158.449	41.0397	-46.2205	-79.1115	-15.8033	81.6816	85.3703	61.2177	54.9812	-34.0472	46.6153	-45.1154	17.1416	17.1416	-16.7584	-23.2716	-37.2074	-129.122
1693.81	3.88914	-45.0172	-36.8086	-114.789	-6.52613	-67.121	-69.1425	-40.9515	88.7925	84.8043	55.3045	46.2445	1.65052	65.2039	-34.0694	3.70233	3.70233	-15.2291	-14.3315	-35.2948	-86.1107
1692.75	21.2057	-23.9353	-10.9578	-28.9254	0.99482	-57.3733	-48.8303	-57.7133	93.7061	78.5228	27.6587	31.0663	-58.2916	56.8859	-16.2416	12.2405	12.2405	32.5007	-5.39397	2.28158	-81.857
1691.68	-26.413	-17.0204	14.8826	-141.257	14.6304	-27.5589	-24.2946	-79.3604	93.3245	81.0625	31.6513	10.5363	9.86929	41.3047	-14.2065	9.79091	9.79091	-19.2787	-25.0601	-28.7288	-24.4762
1690.61	-38.9245	-43.7311	3.19746	-90.5893	-28.8291	-62.1835	-20.5307	-86.2972	74.2901	66.0682	66.5773	8.16936	-3.15882	37.4988	-27.2481	-24.5072	-24.5072	-31.9608	-0.63624	-0.76678	-19.0458
1689.55	-2.31309	-3.19813	-10.0468	-99.7197	-9.07794	-12.3151	-24.4894	-86.7651	80.6289	60.2524	77.9793	11.1425	-21.5926	47.8948	-25.2825	-14.8711	-14.8711	3.31427	-15.532	-63.2987	-30.3545
1688.48	-6.05512	-8.67381	36.0933	-102.987	-52.5188	-4.69761	-18.5493	-65.2503	72.1565	64.4362	101.784	11.9332	15.8741	60.4292	-45.375	-16.2172	-16.2172	45.6797	-44.7152	-31.229	-42.0661
1687.41	-6.28866	5.3081	7.22373	-79.3028	-110.21	-26.6414	2.00591	-55.494	58.3974	73.8541	109.188	3.57382	-29.5978	45.8732	-25.1159	-25.2466	-25.2466	-18.4942	27.3315	-53.9904	-35.6864
1686.35	-13.5352	22.8218	31.4738	-61.4833	-39.5185	56.9676	-21.9014	-40.6808	45.9501	64.8266	108.179	49.7444	-51.6229	51.1032	-13.1252	-4.64115	-4.64115	11.4342	19.5809	-19.1946	-39.7191
1685.28	19.5395	-25.09	-8.31815	-60.0703	3.64662	16.025	-42.0197	-42.3489	89.8699	57.8277	97.1595	48.9476	-26.7859	46.4565	-17.2981	-8.18323	-8.18323	-45.6125	-21.4979	-29.6208	-35.2929
1684.21	-6.98917	-37.6296	4.99479	-86.7642	3.00496	-32.2902	-5.78401	-35.4343	84.1825	55.3998	93.6454	64.174	23.2669	35.7907	-22.7257	9.12051	9.12051	-58.2775	-1.86317	-72.9191	-57.0966
1683.14	-15.9848	-0.67562	13.6201	-23.287	10.5092	1.69509	4.68586	-20.5262	90.364	54.3371	84.6293	70.1555	-9.56497	47.9035	-19.331	2.28636	2.28636	40.8345	-41.7345	0.20868	-31.5695
1682.08	4.80794	-4.3795	14.4361	-115.54	52.6236	9.29893	16.7198	-24.8127	93.8329	58.9335	64.4718	64.1336	-47.7893	40.376	-12.4697	20.6787	20.6787	-7.31868	37.3854	-62.2505	-45.877
1681.01	22.0899	-4.5484	4.32637	-22.8148	-14.1883	25.3362	-9.45579	-34.9178	68.7027	71.1497	54.0254	72.5325	-13.9672	45.5346	-18.3803	-20.1479	-20.1479	-32.399	-7.23823	-49.3904	-42.1955
1679.94	25.3539	-11.7834	11.386	-56.5201	9.59722	-35.5996	-29.8493	-36.7147	61.3115	75.3772	66.0749	47.5073	-25.1696	64.7091	-16.0556	-13.8176	-13.8176	32.9647	-16.165	-24.2147	-50.9647
1678.87	9.35371	21.6074	2.84	-71.49	-30.7292	7.84768	-33.5725	-30.6709	68.0645	78.9546	59.1106	50.7529	-21.9671	72.3399	-1.98082	8.9521	8.9521	-13.3893	5.82875	-44.2121	-59.9916
1677.8	24.8744	-5.05516	25.4947	-57.2066	21.5348	-28.8237	-39.575	-18.6361	43.553	79.4971	66.8985	41.3662	-31.3651	87.3197	10.8171	-14.3161	-14.3161	-8.32117	-13.7989	-46.4145	-86.2303
1676.74	57.8953	-14.0522	26.3065	-54.6252	61.5746	60.9739	-42.4055	-9.97187	39.6786	86.0848	68.7565	46.1369	-2.96883	77.2425	14.1466	22.6904	22.6904	26.8742	1.05365	-26.7269	-59.7704
1675.67	45.3979	6.9639	112.881	-71.9254	56.8532	45.3768	-59.6711	-4.94305	67.7442	95.4586	70.8919	70.2949	-3.3713	79.0955	28.4667	37.7723	37.7723	14.2131	24.2199	-17.9905	-44.8548
1674.6	53.904	24.4427	65.345	-24.9087	47.0492	19.2514	-33.6385	16.5022	122.559	94.1615	75.8969	76.7134	25.0097	71.5865	26.4449	17.7971	17.7971	68.8805	10.5402	-20.1974	-17.7722
1673.53	81.653	27.7977	66.1485	-16.4889	57.5807	19.466	-32.1651	51.5315	129.23	96.4894	69.6449	93.6716	35.3943	48.9186	34.6888	30.6841	30.6841	70.3873	51.5185	-26.506	-7.61555
1672.46	102.395	11.7433	42.0136	-38.4622	-15.2399	36.5283	-9.94012	81.9424	139.796	107.823	54.9505	106.082	22.3966	68.9902	39.9914	34.8065	34.8065	-4.26233	42.5894	15.0362	36.1909
1671.39	110.886	27.4476	22.5618	-9.00533	31.8831	15.6806	-4.09717	82.8273	150.954	106.768	54.6821	126.802	36.3733	71.9271	40.5171	42.2116	42.2116	50.379	-7.90633	-9.04777	28.5974
1670.32	94.8922	60.7841	107.503	-12.2776	58.6681	45.3703	12.7807	72.5653	157.128	119.569	59.582	134.155	14.3916	83.9253	50.7342	47.4251	47.4251	76.6742	53.2401	-18.0894	14.3797
1669.25	80.6525	48.2589	36.6411	28.8472	40.7433	86.6257	11.416	55.5592	159.365	129.571	51.6701	114.766	57.1223	93.8697	64.5139	77.8079	77.8079	35.6948	73.9967	54.8559	11.7056
1668.18	134.593	56.8957	84.1696	52.4366	123.381	58.4129	59.9957	40.1009	147.82	140.314	64.4485	113.61	47.7233	108.804	67.6782	30.4901	30.4901	23.0469	54.3852	-7.47631	12.2531
1667.11	125.594	84.9206	77.1802	38.6454	140.995	60.7216	82.2399	45.3778	117.617	140.318	66.2863	118.025	83.2458	116.556	85.6554	32.4203	32.4203	17.4813	85.8155	75.0024	0.34309
1666.04	148.053	105.885	88.8756	79.74	107.834	88.2762	49.3839	45.9221	118.932	138.418	89.194	118.934	21.749	117.324	88.1306	89.0415	89.0415	73.8395	84.0081	-24.1861	34.1329
1664.97	114.595	114.507	94.3403	50.7718	103.109	70.5946	39.626	57.7591	121.334	143.834	105.466	111.48	46.4866	134.912	107.109	86.5858	86.5858	77.1111	117.795	47.3423	52.1052
1663.9	163.25	98.4595	123.147	25.3169	54.74	106.549	68.8481	76.6603	136.389	133.381	136.542	129.318	125.089	148.739	113.186	90.6913	90.6913	87.4556	68.5315	91.5396	72.3982
1662.83	157.745	84.1788	100.594	96.7355	137.301	99.3834	40.2151	95.5863	112.754	136.268	111.061	155.063	29.5024	153.422	120.933	116.661	116.661	53.5899	45.3787	68.8383	77.1878
1661.75	190.66	138.593	144.946	42.1102	123.441	111.141	67.9972	91.885	116.818	153.743	100.952	163.459	57.815	174.479	126.476	114.201	114.201	60.3988	82.7102	125.298	72.461
1660.68	186.897	129.593	155.062	104.167	154.222	134.457	66.4505	102.839	147.317	148.845	90.8183	166.428	62.785	175.065	127.888	145.621	145.621	95.4875	110.544	78.0374	51.0151
1659.61	169.172	152.288	157.398	53.0595	144.42	106.271	58.0807	99.2882	158.123	171.584	90.4555	174.625	143.122	196.07	141.228	131.137	131.137	137.633	90.9508	107.19	19.6408
1658.54	210.793	118.643	173.726	148.915	94.0566	155.844	72.7198	99.3173	199.054	196.417	80.4212	165.469	121.162	213.594	136.34	129.769	129.769	144.423	123.513	72.2234	20.3856
1657.47	210.519	167.733	168.284	54.6728	95.4216	168.634	125.8	104.099	214.505	209.609	85.6121	166.918	95.6212	225.286	118.119	166.631	166.631	71.7089	144.214	101.367	58.2408
1656.4	222.457	162.253	145.744	57.2283	207.285	194.021	111.724	130.004	254.83	220.297	90.7546	165.553	61.1213	208.154	126.585	151.058	151.058	154.463	96.19	141.408	87.224
1655.32	272.768	195.482	202.473	129.72	192.412	156.393	82.2452	129.715	264.691	219.705	123.713	171.825	153.955	199.276	135.84	139.859	139.859	104.731	151.24	75.0965	122.045
1654.25	305.621	191.759	212.565	133.428	137.007	148.174	107.348	142.956	264.505	226.008	131.425	183.239	164.279	199.227	135.828	187.616	187.616	166.261	157.711	154.654	146.654
1653.18	314.049	173.965	283.244	155.777	174.838	184.048	135.738	138.526	280.084	225.566	161.948	224.764	102.896	202.915	149.396	166.59	166.59	127.137	189.047	163.318	160.576
1652.11	324.217	215.967	217.205	155.983	178.212	236.701	153.606	179.469	284.035	241.384	176.303	257.278	152.656	182.239	175.424	221.965	221.965	186.876	177.75	171.979	192.409
1651.03	414.566	215.758	249.03	193.464	239.317	192.793	229.697	187.42	306.668	263.167	197.122	260.417	166.559	187.738	190.391	210.761	210.761	202.472	193.682	228.317	213.641
1649.96	478.741	227.854	283.951	211.132	203.183	264.311	236.518	233.528	336.114	267.529	197.856	282.038	182.249	189.883	220.268	222.47	222.47	244.531	157.534	185.203	221.536
1648.88	506.3	278.611	287.807	160.097	280.462	267.618	241.436	277.574	357.536	303.863	233.583	333.366	215.847	224.634	239.072	255.99	255.99	219.534	249.195	256.498	224.573
1647.81	559.982	311.778	319.602	262.751	264.579	290.85	274.322	327.842	419.728	332.449	280.985	360.475	190.327	274.469	235.788	257.872	257.872	243.935	240.26	231.093	262.366
1646.74	620.612	320.336	318.796	223.363	285.139	284.714	275.314	361.799	468.899	351.446	307.519	406.862	220.33	301.33	245.248	341.531	341.531	254.219	281.01	309.162	290.748
1645.66	691.671	330.648	345.919	300.366	353.253	375.034	274.21	388.136	512.606	375.379	333.277	434.661	341.632	326.816	264.953	322.683	322.683	289.185	326.476	293.285	313.194
1644.59	841.063	421.746	386.994	340.109	405.155	381.462	335.313	372.636	564.088	391.301	365.53	477.326	278.512	355.689	299.536	344.171	344.171	311.798	282.056	391.727	341.809
1643.51	962.547	486.472	448.219	405.432	446.921	478.02	347.34	365.504	627.528	418.877	405.054	515.561	304.902	390.29	333.773	393.986	393.986	380.231	340.509	418.018	386.869
1642.44	1177.98	514.305	450.489	434.674	424.953	535.773	376.785	378.499	696.794	461.707	436.3	575.82	386.756	436.128	387.94	461.217	461.217	355.236	393.032	474.23	419.803
1641.37	1480.36	568.459	567.503	590.666	559.736	564.17	441.911	417.531	793.354	541.94	492.561	639.95	413.118	472.285	431.765	451.076	451.076	435.972	452.626	477.375	495.112
1640.29	1777.42	629.614	689.124	601.262	606.507	609.315	519.555	463.444	859.617	645.764	531.033	711.247	532.489	523.706	477.94	520.451	520.451	566.007	506.291	598.831	549.087
1639.21	2194.41	701.276	816.903	751.356	710.883	741.373	573.037	562.386	972.844	748.862	575.891	806.395	542.718	604.305	562.107	610.493	610.493	613.209	575.295	649.541	612.143
1638.14	2783.45	851.863	890.394	872.341	782.878	905.844	680.982	685.478	1148.94	873.647	683.585	966.661	685.27	697.674	635.663	679.815	679.815	686.811	725.778	753.25	707.892
1637.06	3327.07	974.33	1030.49	966.552	954.891	1049.32	818.668	861.927	1386.2	998.98	842.298	1147.5	809.892	834.453	744.49	800.278	800.278	903.011	789.995	821.584	826.898
1635.99	3800.95	1191.46	1221.65	1272.2	1112.7	1296.37	1029.42	1066	1703.09	1155.96	1015.98	1388.55	988.096	988.821	918.066	903.283	903.283	1013.51	1031.31	1036.66	985.01
1634.91	4323.33	1496.19	1477.81	1518.49	1394.7	1562.17	1358.81	1321.39	2095.6	1387.94	1244.03	1678.02	1244.88	1228.46	1153.71	1201.05	1201.05	1231.33	1211.14	1320.95	1220.51
1633.84	4518.74	1795.55	1854.67	1948.21	1705.89	1963.91	1807.14	1627.71	2578.64	1689.88	1549.95	2077.27	1503.35	1519.32	1455.92	1396.43	1396.43	1540.59	1407.44	1425.83	1532.91
1632.76	4764.49	2215.75	2355.26	2361.52	2040.2	2515.12	2250.64	1982.13	3131.27	2062.03	1966.3	2556.4	1895.73	1865.37	1841.38	1671.16	1671.16	1872.61	1881.01	1722.17	1982.85
1631.68	4572.26	2809.31	2707.06	2887.31	2617.71	3015.91	2812.3	2438.76	3690.14	2492.64	2394.38	3102.35	2341.56	2302.02	2330.04	2098.06	2098.06	2260.81	2375.65	2128.41	2427.3
1630.61	4294.98	3357.1	3263.05	3561.51	3106.18	3509.21	3391.72	2947.71	4174.53	3029.28	2914.8	3651.11	2924.74	2784.4	2856.42	2472.61	2472.61	2750.89	2851.24	2541.3	2934.54
1629.53	3856.26	3834.62	3815.74	4089.22	3709.54	4021.16	3911.65	3469.22	4544.19	3578.41	3425.58	4158.21	3552.37	3319.48	3420.68	2916.61	2916.61	3283	3467.02	2987.97	3437.61
1628.45	3488.89	4361.02	4293.97	4497.21	4290.48	4628.06	4360.82	3951.27	4808.14	4084.3	3899.19	4559.66	4151.2	3790.25	3935.55	3463.73	3463.73	3946.8	3917.48	3327.26	3946.08
1627.38	3104.3	4557.97	4510.58	4822.68	4743.08	4751.82	4653.25	4344.17	4884.55	4516.29	4303.21	4810.65	4512.41	4179.4	4364.66	3994.35	3994.35	4492.57	4324.15	3779.06	4348.98
1626.3	2692.06	4805.63	4668.34	4835.98	4844.48	4845.23	4709.44	4636.89	4804.21	4811.08	4547.47	4844.88	4429.11	4474.72	4627.22	4328.09	4328.09	4672.55	4725.96	4176.43	4632.75
1625.22	2392.79	4612.03	4776.55	4697.34	4788.5	4653.35	4565.6	4740.95	4574.02	4914.97	4645.32	4705.6	4624.19	4562.43	4700.79	4725.82	4725.82	4703.1	4869.49	4625.21	4777.2
1624.14	2019.01	4332.72	4532.19	4511.2	4812.2	4354.97	4322.66	4718.53	4212.24	4873.4	4571.38	4412.37	4366.05	4474.68	4583.59	4783.38	4783.38	4698.49	4816.15	4677.78	4722.29
1623.06	1737.32	3890.75	4258.54	4133.82	4380.19	4003.43	3968.58	4568.78	3777.99	4669.82	4341.49	4029.01	3922.5	4235.99	4275.75	4573.74	4573.74	4323.21	4472.98	4697.79	4501.48
1621.98	1466.14	3520.68	3876.8	3681.22	4123.73	3484.91	3462.1	4284.83	3357.34	4317	4008.12	3600.89	3445.21	3844.61	3844.68	4411.95	4411.95	3984.96	4023.9	4564.58	4201.36
1620.91	1257.49	3133.25	3604.92	3275.14	3715.17	3235.97	3025.51	3947.83	2920.09	3849.39	3549.39	3197.02	3071.52	3417.29	3387.68	3899.53	3899.53	3490.53	3500.77	4234.86	3722.67
1619.83	1144.31	2717.97	3184.8	2801.99	3333.96	2775.19	2607.96	3589.74	2525.49	3382.58	3108.74	2799.98	2653.39	2972.66	2912.26	3425.28	3425.28	3038.41	2981.36	3966.24	3202.05
1618.75	944.465	2416.51	2817.35	2488.91	2914.61	2425.22	2236.07	3168.85	2182.61	2893.33	2653.78	2465.42	2224.71	2564.37	2461.05	3004.38	3004.38	2574.17	2468.02	3564.92	2720.97
1617.67	831.374	2039.97	2406.79	2223.43	2456.11	2058.68	1962.9	2764.39	1924.4	2475.4	2244.53	2156.22	1867.47	2138.46	2064.81	2552.16	2552.16	2206.63	2059.64	3087.88	2336.72
1616.59	714.856	1756.22	2058.14	1742.62	2225.4	1873.82	1705.07	2386.85	1664.28	2129.69	1898.96	1877.47	1542.43	1831.27	1734.83	2203.18	2203.18	1839.21	1798.54	2697.69	1946.73
1615.51	584.516	1483.06	1837.77	1620.95	1917.23	1571.14	1440.96	2051.05	1466.78	1821.44	1620.86	1623.38	1303.02	1594	1448.58	1872.76	1872.76	1561.41	1445.73	2348.28	1689.52
1614.43	606.696	1272.91	1541.83	1348.82	1590.03	1367.65	1218.86	1715.8	1310.14	1538.51	1416.27	1427.81	1229.35	1358.44	1229.41	1604.28	1604.28	1318.79	1223.65	2008.46	1485.25
1613.35	502.407	1158.93	1313.91	1228.43	1405.9	1141.3	1086.35	1469.83	1157.47	1323	1237.37	1232.91	913.502	1150.21	1045.59	1381.44	1381.44	1135.9	1084.01	1712.1	1282.11
1612.27	457.045	957.652	1218.79	1031.7	1270.13	978.627	916.135	1281.85	1040.01	1150.67	1079.16	1051.87	863.072	1001.47	888.873	1221.56	1221.56	979.365	855.015	1507.89	1115.31
1611.19	422.088	843.774	1069.69	821.148	1065.99	887.946	762.934	1091.76	946.594	991.267	951.22	944.09	721.867	847.545	761.424	1003.2	1003.2	833.411	794.271	1344.35	999.476
1610.11	433.892	726.445	866.658	850.163	959.51	786.874	683.762	931.653	843.152	851.693	827.333	856.467	648.35	760.147	681.824	848.862	848.862	789.181	755.888	1167.34	839.992
1609.03	416.263	595.188	785.541	714.911	774.608	675.415	604.691	821.735	773.132	742.717	720.206	767.608	517.91	689.812	601.021	753.096	753.096	683.623	555.291	1014.74	738.717
1607.95	388.256	617.603	679.781	623.654	746.66	583.794	544.724	706.294	729.999	652.539	621.759	707.016	536.979	645.915	522.07	669.281	669.281	555.322	525.192	910.892	653.267
1606.87	365.45	512.594	575.6	532.43	687.551	618.256	549.941	643.138	674.513	606.588	549.429	638.238	447.523	599.615	473.333	607.161	607.161	481.38	491.577	801.674	587.406
1605.79	346.112	466.956	574.735	532.575	642.537	517.302	535.471	586.824	626.827	566.356	489.771	602.6	441.695	581.656	413.082	574.304	574.304	465.271	492.047	731.707	514.793
1604.71	276.614	431.803	532.258	449.492	524.162	432.004	487.487	539.602	576.371	540.4	435.155	566.443	380.741	554.198	380.408	562.032	562.032	478.941	436.13	623.909	481.878
1603.62	300.538	443.764	511.37	391.864	529.442	449.814	429.992	494.582	547.555	517.059	399.973	560.035	326.92	514.087	356.688	456.658	456.658	399.799	449.529	633.75	471.503
1602.54	260.47	426.069	484.325	370.079	527.686	400.993	396.844	460.042	524.233	494.858	374.023	505.748	312.228	468.748	313.364	459.566	459.566	381.962	448.831	631.424	446.549
1601.46	237.707	397.917	411.077	365.631	446.565	395.904	341.988	420.044	474.774	469.305	371.787	447.61	279.767	415.632	297.495	427.841	427.841	353.628	355.38	581.804	424.032
1600.38	258.167	375.006	431.803	354.254	370.495	360.637	329.017	373.438	447.754	445.464	378.744	432.759	236.656	359.117	284.07	417.768	417.768	405.811	332.394	572.731	389.791
1599.3	247.51	355.589	387.848	330.178	431.031	296.25	311.234	332.81	416.275	442.768	353.746	400.499	243.308	318.578	264.924	348.196	348.196	368.734	343.453	529.893	362.739
1598.21	236.856	285.635	333.13	300.338	342.942	281.818	279.126	309.146	430.538	418.488	359.638	371.04	201.994	304.294	248.992	358.692	358.692	319.423	309.916	481.667	362.423
1597.13	157.099	309.806	349.24	257.808	303.071	272.591	282.284	293.495	436.857	385.476	344.454	341.08	224.635	314.717	229.392	320.518	320.518	296.368	258.793	475.316	354.875
1596.05	196.559	269.504	303.781	296.094	373.622	286.244	287.689	283.43	408.784	339.418	327.65	307.832	190.442	312.945	241.324	327.772	327.772	266.325	295.665	522.968	336.686
1594.96	189.374	246.636	262.957	213.187	298.636	264.543	254.451	263.983	400.048	300.628	295.738	293.741	161.587	309.656	252.513	279.887	279.887	238.042	258.635	445.073	305.742
1593.88	164.924	267.317	266.761	250.314	368.158	207.505	194.062	285.195	379.631	263.712	248.237	267.402	143.394	320.342	249.98	278.497	278.497	228.999	246.243	449.527	265.683
1592.8	190.55	256.647	253.644	182.443	284.171	239.87	157.72	279.309	368.294	231.322	235.698	257.849	153.604	320.392	240.766	251.172	251.172	223.456	218.615	471.521	285.072
1591.71	147.121	245.981	283.593	129.593	229.299	171.426	156.823	266.336	328.451	204.61	214.938	226.66	146.065	313.406	214.179	230.338	230.338	200.438	144.107	368.043	291.863
1590.63	115.787	165.688	245.874	177.094	192.498	199.628	148.157	252.407	271.467	188.12	212.772	213.055	111.916	267.54	220.345	210.593	210.593	172.186	195.03	341.485	264.023
1589.55	93.0931	205.514	211.243	183.068	183.783	168.611	129.647	237.814	276.823	180.451	159.003	199.257	123.9	229.817	193.525	216.777	216.777	65.328	156.878	271.781	257.535
1588.46	115.262	198.342	193.531	121.025	222.186	133.448	140.198	206.204	279.836	189.728	125.964	191.673	134.105	176.479	175.609	184.082	184.082	98.2447	148.028	277.608	242.206
1587.38	92.5763	173.775	200.415	159.281	212.466	156.449	139.869	186.579	292.547	194.081	136.118	180.986	123.028	162.101	160.134	129.803	129.803	117.179	112.241	264.559	231.424
1586.29	111.288	199.662	178.103	138.75	145.63	84.9651	174.07	176.414	263.055	178.873	108.15	163.585	95.9985	146.624	138.429	142.475	142.475	125.629	90.5195	313.517	217.045
1585.21	78.265	155.972	143.506	74.4439	170.994	113.155	152.751	156.983	266.562	154.185	121.771	139.52	99.1125	115.249	135.309	119.525	119.525	90.432	75.831	262.732	182.698
1584.12	95.2485	124.47	119.675	79.2797	122.22	98.7844	149.356	132.364	234.079	142.052	105.478	131.728	57.918	95.3672	125.913	137.59	137.59	133.793	86.9042	271.251	114.16
1583.04	84.6474	101.672	121.958	97.9367	64.4495	58.4764	141.929	116.165	218.197	125.751	68.8648	115.781	22.0537	119.576	98.53	107.095	107.095	121.294	81.5854	157.176	112.925
1581.95	77.4966	124.076	91.9963	100.465	131.871	79.3928	141.387	74.7962	227.413	120.432	68.8781	113.788	55.2972	116.934	79.6085	111.132	111.132	148.93	59.8838	200.728	95.0427
1580.87	49.6716	101.286	105.03	12.032	109.161	48.4385	107.321	81.5807	183.306	109.634	50.5831	107.373	24.7602	122.427	64.169	131.346	131.346	68.3965	6.59777	203.865	74.1499
1579.78	80.4297	120.207	78.1512	82.4936	31.4022	91.1274	89.4289	89.4749	162.827	115.559	30.0755	106.54	63.304	114.694	78.5318	67.4384	67.4384	36.7293	72.6586	147.759	79.564
1578.7	73.2831	87.0014	71.2314	33.23	75.7732	70.5494	54.2685	80.0726	180.853	99.5964	-2.67424	82.242	43.4002	122.195	71.5668	94.1215	94.1215	57.3899	39.2728	106.48	77.994
1577.61	55.8062	104.181	59.7097	20.8098	86.1056	15.766	31.9055	61.4123	153.562	100.497	-12.4639	55.1116	46.5182	124.218	71.8808	108.937	108.937	15.2742	49.1686	139.239	66.3934
1576.52	50.3882	93.567	89.6126	1.4892	72.4227	22.1583	17.0142	73.3043	123.834	103.482	-1.44587	48.1154	33.7046	125.74	71.8846	86.024	86.024	98.6882	-25.1254	146.42	56.7535
1575.44	32.9218	86.4298	73.4909	-16.6739	48.7415	22.3297	-4.06374	80.3836	104.371	74.5562	0.54483	50.5982	56.2906	109.336	69.6443	70.6626	70.6626	70.5237	53.7521	134.762	49.5629
1574.35	41.2408	58.4624	45.1055	20.3776	31.0691	49.4399	-26.5859	75.1829	84.3017	56.2734	6.76682	45.6463	32.8625	79.5856	70.4167	97.3252	97.3252	58.0528	3.03644	76.0251	79.7555
1573.26	15.0367	89.5201	58.1285	29.8158	111.397	54.7857	-4.77282	62.1356	67.6984	55.7435	11.7172	56.071	20.0578	49.1703	66.9316	85.1987	85.1987	52.5557	19.4247	128.94	70.1303
1572.17	64.5467	82.3872	78.8102	-21.6828	11.7388	32.1619	0.16892	56.1535	86.5432	46.202	-3.9932	58.8701	9.02599	52.4627	58.8566	83.8465	83.8465	45.3184	-20.2761	145.528	102.795
1571.09	33.1868	64.8461	45.8402	47.5359	58.0545	-38.0913	-7.16572	42.6742	85.1989	39.779	15.4079	59.3525	-9.07598	23.2228	54.7575	86.8019	86.8019	27.6333	73.2126	112.365	106.378
1570	24.1969	59.4547	52.7243	29.3828	46.3884	7.64628	-21.1042	31.354	60.8878	39.4467	20.5725	46.5546	-28.9397	6.93137	53.0574	53.1506	53.1506	23.8856	59.2124	26.7891	93.063
1568.91	80.5565	41.924	-5.50497	25.0236	-7.24038	20.2409	-4.36312	21.8764	61.6817	44.4868	27.0409	42.083	41.9264	-12.3267	51.1058	62.5691	62.5691	11.4339	-16.6761	81.0178	103.621
1567.82	71.561	50.4119	37.4016	3.43585	-8.90118	-2.36247	10.6118	3.83757	89.1927	26.772	43.0831	35.7355	10.2607	3.68644	61.0531	97.8136	97.8136	4.20866	-28.3195	88.6551	77.5644
1566.73	69.4446	24.2196	45.0661	-26.1863	-14.5566	-18.3168	33.726	-7.37889	55.1179	24.867	19.6651	8.65673	-10.7911	11.5463	41.0826	52.3416	52.3416	5.68813	14.9068	106.936	61.975
1565.65	22.6425	74.3128	92.5418	-22.492	39.7104	-8.82253	85.7514	-2.10983	50.6142	18.4103	35.3919	17.5149	12.3371	20.1406	25.1712	44.5409	44.5409	104.613	52.2817	41.9294	34.1306
1564.56	44.5929	42.9257	35.8905	3.01818	33.0491	-6.57309	90.8711	-1.83795	64.3368	22.7971	26.9541	28.1959	3.65868	17.7709	14.7121	75.4668	75.4668	-12.2324	-3.71224	-2.90851	14.0368
1563.47	95.7426	34.0779	25.1824	11.2998	-19.5326	-25.0093	98.0656	2.8508	73.4981	25.8971	25.3506	39.6805	-1.48345	38.5172	19.4169	42.9286	42.9286	3.16471	-8.34913	11.3537	36.7873
1562.38	59.2673	91.0724	49.6788	19.5771	14.7423	-6.21195	103.181	35.3203	128.676	46.6703	37.8321	67.42	14.5669	61.9417	18.8825	48.0368	48.0368	39.5465	30.1762	96.7626	23.0985
1561.29	81.1988	82.2189	35.9117	27.8528	18.0677	3.27428	90.3182	69.0053	152.529	54.8401	6.05697	76.8461	-1.16889	89.7805	26.3458	59.5493	59.5493	62.8033	13.8718	57.311	23.9861
1560.2	73.9306	80.2964	51.218	8.58706	31.3694	43.7691	56.697	55.5473	119.537	69.3866	-17.7543	69.0148	-9.83772	81.1302	40.4951	49.4438	49.4438	59.9737	39.5527	76.9238	66.5341
1559.11	101.001	33.3511	68.0485	8.83107	-11.2532	-13.9373	45.1092	35.3157	105.727	79.0366	-7.31369	73.7762	-6.14852	86.7327	51.5767	43.6405	43.6405	24.1189	13.9253	75.0609	64.0738
1558.02	73.1334	55.677	89.461	-11.5712	22.8985	5.87892	18.5249	48.6703	130.111	72.6261	-11.0274	99.8085	-0.69607	99.0295	52.1925	23.8707	23.8707	87.3387	92.0525	117.47	76.7001
1556.93	103.626	107.423	60.4057	7.02587	72.9933	-30.1032	13.1291	63.4689	146.32	66.7549	-16.9588	105.503	55.9204	125.3	64.5303	54.6001	54.6001	77.5564	19.8061	17.6857	96.1557
1555.84	111.802	70.882	58.8796	82.9469	23.3642	-19.5879	0.8131	82.9385	124.688	53.0443	-36.706	104.762	4.91117	129.118	52.6469	76.7254	76.7254	48.6676	120.044	58.7496	95.8605
1554.75	78.7993	93.1889	81.8107	16.6863	51.509	-42.1259	25.1831	85.344	131.848	52.2879	-24.8705	101.286	-12.5692	126.245	52.8645	64.4773	64.4773	108.375	-5.77349	121.252	97.5242
1553.66	100.698	86.0757	90.9791	82.2625	0.90468	6.59448	30.8719	88.8801	176.511	54.9114	-30.2891	95.1082	49.309	122.676	52.133	91.9611	91.9611	74.2821	29.2018	83.1887	98.4786
1552.57	91.719	113.561	92.5046	16.0275	43.99	32.5848	45.7909	83.6816	209.855	29.8402	-9.41553	90.1969	79.4303	124.096	65.3183	77.5667	77.5667	78.4025	92.1162	130.923	128.159
1551.48	94.7457	85.6927	75.6966	35.749	58.1663	9.01751	71.7627	87.2113	245.075	33.1295	8.96448	82.8337	0.25004	118.098	95.3395	79.2779	79.2779	101.617	1.30445	115.654	117.59
1550.39	78.9133	116.626	55.8401	19.9517	49.425	32.9341	104.656	93.4691	241.856	38.0074	-0.45461	79.2371	7.45795	119.471	107.196	74.5489	74.5489	44.9807	59.5443	151.307	80.6334
1549.3	83.6545	125.073	80.2785	59.1383	27.7391	50.6508	139.635	65.5772	222.787	53.6175	-14.6816	94.7076	76.337	102.905	121.641	104.156	104.156	43.8986	60.7273	203.023	79.6576
1548.21	107.246	92.0322	126.084	102.891	61.8252	61.1395	153.99	62.1334	195.341	56.4564	-8.10063	110.378	43.0075	106.547	122.66	75.8232	75.8232	58.433	43.2894	122.123	73.0563
1547.11	86.2783	114.306	72.6441	103.12	17.2451	69.5614	132.535	54.5049	206.159	71.8229	-3.12725	132.398	74.8645	123.428	107.026	82.8951	82.8951	90.3101	74.7279	175.165	64.5573
1546.02	72.1714	105.47	118.435	58.7038	46.343	18.1648	113.976	53.5485	188.266	78.5501	-1.85843	122.583	36.2641	119.135	93.4958	65.2999	65.2999	75.3454	56.1304	157.228	68.3969
1544.93	104.315	108.73	97.0624	72.6751	34.6247	58.5561	42.8393	34.9064	150.681	81.6704	12.5319	121.348	168.478	115.333	88.0231	65.9378	65.9378	41.3107	52.6606	257.097	81.0008
1543.84	73.084	92.9883	72.6462	56.889	69.6788	75.2216	38.0603	23.3662	147.567	95.3046	21.234	120.67	66.4964	105.223	79.8515	101.95	101.95	97.4481	100.361	192.308	95.7215
1542.74	67.5471	97.9759	98.5808	89.1634	62.9338	45.4985	28.2646	17.8676	175.056	97.5007	-13.8377	106.648	70.1639	92.9006	57.9693	98.2935	98.2935	59.9566	23.6336	151.631	122.17
1541.65	109.945	121.955	68.0722	28.7672	72.1069	77.6187	40.6063	20.156	146.114	75.6521	-11.9158	96.2862	70.3096	92.4062	53.9823	111.784	111.784	69.274	89.9227	145.753	144.081
1540.56	104.403	101.04	80.2736	63.3223	59.3965	46.8757	63.0857	12.8801	130.741	72.2127	-18.9369	82.0425	51.1009	105.466	77.3176	85.6267	85.6267	75.1241	52.743	105.1	100.805
1539.47	86.8837	87.0374	86.3717	101.294	59.617	-11.672	102.697	28.2053	130.692	68.4613	-33.0846	105.467	93.4718	108.515	69.8552	99.1139	99.1139	91.3662	100.409	119.295	67.3358
1538.37	113.856	119.634	98.5653	91.2354	21.0644	86.362	122.565	43.2525	112.923	80.998	-68.5016	117.964	61.9536	100.86	83.8789	105.099	105.099	76.4233	73.6981	177.614	87.3801
1537.28	108.315	88.3782	63.5069	-2.2651	76.9542	67.992	141.594	70.3992	94.2311	73.6599	-92.5284	113.046	93.7563	90.7741	90.6168	130.355	130.355	89.1975	34.2181	136.978	76.644
1536.19	114.749	83.0102	92.4624	66.5574	82.1394	85.6655	144.84	68.1435	129.857	80.5167	-86.1517	126.067	18.2926	89.149	84.3344	98.8603	98.8603	96.7723	77.2166	181.906	47.9224
1535.09	165.641	125.938	151.879	94.219	34.6599	57.0081	143.165	79.2378	124.232	67.9553	-71.8054	134.42	97.5567	71.5897	83.3003	106.982	106.982	158.016	98.1356	212.117	45.5485
1534	125.9	120.565	151.865	80.7417	58.7259	78.7943	128.522	55.6429	132.53	80.4543	-42.1448	137.15	53.7573	88.7457	80.4765	124.733	124.733	77.2941	79.5716	208.913	67.9763
1532.9	169.933	103.125	89.4087	112.961	26.1659	53.2366	159.577	76.8132	184.809	94.9505	-18.1351	152.155	9.97443	79.2191	81.1111	88.9746	88.9746	91.7919	23.8681	161.624	80.3752
1531.81	106.278	130.511	98.5431	84.6388	54.1963	94.5644	141.501	83.7614	228.947	102.141	-4.29806	171.973	85.6832	73.2067	90.3743	91.7441	91.7441	95.9008	113.262	206.516	120.762
1530.71	104.161	125.14	112.242	111.137	51.4356	76.2141	124.919	79.7905	232.783	101.244	42.8903	168.834	68.2608	118.277	94.1593	92.3725	92.3725	132.881	34.3647	199.311	147.268
1529.62	131.09	131.834	86.3584	112.508	-2.94564	61.9836	102.382	61.5288	242.95	118.111	85.5444	169.241	57.8697	136.04	103.86	118.668	118.668	81.6297	77.3164	169.407	135.155
1528.52	147.759	183.32	119.839	86.4855	70.7307	109.458	79.5888	74.7324	268.838	118.598	107.518	176.503	47.4829	154.505	112.923	126.776	126.776	103.035	72.6934	203.596	182.672
1527.43	152.466	143.49	174.61	127.805	78.8838	84.9467	67.8347	85.5969	263.436	138.318	112.884	159.66	107.329	161.474	120.856	133.811	133.811	139.995	162.014	193.726	208.533
1526.33	134.975	188.066	103.09	162.263	76.1195	76.8911	95.067	92.6534	258.093	146.659	87.5211	158.999	116.247	140.346	131.101	131.225	131.225	85.3143	54.176	250.586	180.168
1525.24	127.732	124.142	104.606	103.163	109.068	58.5611	102.901	80.3444	273.392	149.059	60.9876	180.834	21.6111	155.691	137.237	117.952	117.952	115.35	95.9342	200.684	166.343
1524.14	173.407	122.221	197.371	146.738	89.4377	198.483	110.239	79.1635	252.68	142.666	43.7422	201.045	142.847	159.624	129.454	99.3411	99.3411	160.929	70.4466	245.516	169.924
1523.04	184.932	149.563	148.692	136.699	148.154	125.687	138.832	89.5968	243.608	147.293	39.5002	183.153	53.5039	177.914	131.561	137.356	137.356	159.84	56.5577	290.333	199.24
1521.95	164.034	166.569	157.801	183.673	131.498	121.739	171.533	109.977	287.833	161.022	44.6664	189.24	88.7371	146.688	147.957	118.749	118.749	157.023	85.5465	277.79	201.205
1520.85	149.967	171.524	179.067	147.413	115.838	129.09	156.648	110.82	300.275	172.571	73.4133	215.512	125.712	135.493	169.252	140.727	140.727	142.118	178.244	385.253	241.098
1519.76	178.546	154.111	185.128	156.756	118.024	208.316	162.191	123.678	303.553	192.02	94.8647	209.591	117.082	151.305	158.45	171.24	171.24	185.934	163.185	376.698	256.708
1518.66	178.124	147.026	204.861	120.514	101.381	145.837	124.594	115.812	330.729	207.782	132.086	214.486	57.6138	157.198	142.828	176.12	176.12	219.375	186.349	485.437	281.223
1517.56	191.342	193.256	194.204	82.0054	143.197	189.106	107.313	120.103	320.672	203.261	153.277	179.804	113.855	172.813	136.083	211.951	211.951	195.835	180.557	447.55	289.408
1516.46	197.737	205.08	210.891	147.175	180.046	194.387	142.071	134.178	323.688	219.808	183.814	164.739	133.274	165.761	138.589	164.533	164.533	198.195	184.028	446.985	277.864
1515.37	243.33	184.235	197.2	208.904	97.0435	213.006	152.992	111.568	328.927	235.836	176.167	163.175	126.401	174.125	142.621	233.428	233.428	238.519	194.444	522.351	275.043
1514.27	200.293	170.273	233.618	165.847	188.347	157.754	158.301	119.239	323.791	236.732	186.818	184.208	117.78	202.59	157.282	247.893	247.893	159.779	157.408	461.839	259.693
1513.17	262.907	199.28	254.843	162.655	171.705	154.832	178.052	140.845	333.799	235.797	193.637	193.004	177.474	205.228	156.719	232.49	232.49	219.071	180.552	541.17	235.551
1512.07	247.137	199.066	248.741	131.006	158.037	196.011	212.35	144.932	328.706	257.82	214.31	187.88	105.801	231.892	171.978	261.879	261.879	224.877	237.236	527.278	230.661
1510.97	294.391	212.595	279.06	181.313	148.334	198.21	215.194	144.254	366.683	286.727	196.844	207.363	118.2	226.715	200.827	268.868	268.868	318.625	270.767	571.959	222.811
1509.88	363.764	219.25	291.162	197.464	107.959	189.133	208.391	154.201	356.887	311.464	174.991	237.487	183.113	243.968	211.203	320.624	320.624	267.514	255.716	611.3	260.359
1508.78	428.004	265.399	268.369	238.64	179.39	241.557	217.624	202.857	369.633	334.43	185.585	269.472	216.498	293.462	224.359	332.928	332.928	331.917	311.199	630.67	283.905
1507.68	378.17	222.248	336.585	232.026	206.284	243.748	179.333	242.895	390.201	365.429	202.879	283.151	213.12	339.394	250.445	358.014	358.014	356.658	284.587	632.738	314.596
1506.58	418.557	285.546	371.415	257.258	231.19	241.84	183.949	282.06	352.704	418.776	233.046	288.313	220.241	365.029	290.776	373.502	373.502	340.032	326.175	652.095	329.882
1505.48	399.372	269.869	350.137	304.086	217.525	245.055	208.656	332.784	367.079	464.965	296.992	330.479	260.598	404.834	348.478	375.137	375.137	419.893	296.103	675.437	383.882
1504.38	393.803	317.691	406.174	294.054	224.625	307.673	223.731	347.42	384.705	539.068	344.536	352.051	342.918	447.51	395.56	466.23	466.23	448.05	391.977	720.046	477.124
1503.28	372.928	387.8	390.96	262.428	280.154	350.812	284.929	385.699	417.268	600.278	405.026	384.38	306.294	482.345	456.526	493.402	493.402	526.141	404.644	796.546	510.443
1502.18	425.191	452.737	421.209	424.012	365.309	392.911	333.497	399.128	488.927	644.188	453.21	410.56	402.562	509.19	496.533	531.21	531.21	569.765	485.448	849.092	539.496
1501.08	397.515	402.739	493.867	457.143	432.647	361.293	378.061	382.36	507.372	685.064	485.958	424.984	439.362	545.364	515.212	577.519	577.519	627.148	526.963	845.806	597.448
1499.98	400.451	443.642	514.998	430.05	401.175	377.789	389.671	398.968	525.728	686.333	480.345	419.987	455.173	547.769	529.691	609.976	609.976	586.396	603.097	798.672	606.449
1498.88	398.287	424.524	510.376	398.423	366.75	498.652	435.551	396.516	522.872	678.149	459.401	416.672	399.335	573.895	504.575	593.477	593.477	612.777	574.162	839.233	602.223
1497.78	404.62	419.126	489.1	404.285	394.55	435.317	414.245	412.072	522.41	641.318	449.591	419.525	418.643	574.575	502.198	572.728	572.728	590.971	526.773	951.507	572.957
1496.68	422.844	398.305	576.832	413.552	407.53	444.631	411.247	424.443	519.003	610.291	423.904	406.938	411.743	542.418	483.518	595.595	595.595	546.81	442.476	763.616	537.794
1495.58	432.568	451.174	464.734	381.946	352.393	410.986	388.476	419.955	488.068	592.744	405.401	412.883	390.872	506.514	458.707	505.73	505.73	530.183	503.573	865.239	505.537
1494.48	460.972	423.502	508.551	441.153	435.449	457.112	362.097	423.053	494.302	554.297	403.107	422.127	387.471	490.816	427.727	475.438	475.438	517.004	339.722	721.24	499.573
1493.38	448.608	426.672	523.604	477.643	358.617	432.68	357.937	414.424	504.064	550.08	392.672	430.423	427.718	474.121	406.108	502.562	502.562	457.406	463.091	814.873	513.365
1492.27	533.029	424.704	518.986	375.7	354.82	506.383	397.29	414.38	528.874	542.037	368.814	466.806	373.692	470.949	384.33	483.973	483.973	502.694	369.643	697.477	508.73
1491.17	530.841	431.297	540.082	462.101	386.536	475.819	373.386	406.516	556.638	530.084	360.235	484.67	408.691	469.938	358.8	460.077	460.077	460.309	497.573	792.407	545.566
1490.07	588.059	449.871	529.413	404.432	452.758	433.006	396.018	431.922	536.22	523.077	377.556	498.713	434.954	499.068	352.979	493.562	493.562	421.377	391.475	797.101	583.545
1488.97	607.922	459.881	509.676	448.84	498.249	494.41	426.487	465.204	562.748	523.374	406.214	489.779	421.081	512.106	351.725	459.051	459.051	490.702	411.028	735.477	593.837
1487.86	666.801	488.711	550.414	460.355	407.67	487.358	464.725	466.495	576.064	533.269	424.215	496.321	461.286	546.882	357.951	499.958	499.958	465.522	393.704	795.874	576.591
1486.76	705.303	476.466	580.557	534.209	418.652	528.305	469.34	486.556	606.437	545.028	432.538	509.457	422.998	530.063	399.152	492.004	492.004	541.684	408.641	750.183	587.71
1485.66	798.063	561.737	598.6	513.97	451.311	610.08	522.105	490.363	648.421	577.819	442.142	526.249	447.496	543.897	432.455	529.705	529.705	655.597	465.037	811.882	579.398
1484.55	790.741	559.745	660.452	614.985	485.928	593.824	541.19	539.627	665.898	604.485	453.189	569.236	475.471	563.269	465.528	514.318	514.318	556.576	524.867	803.316	570.13
1483.45	849.543	617.607	669.41	611.732	564.865	624.524	592.574	565.816	735.755	605.935	492.34	607.738	540.038	589.373	491.799	535.02	535.02	545.136	513.292	863.657	554.711
1482.35	974.432	637.833	746.329	574.5	571.869	671.54	630.378	605.149	782.774	627.406	496.16	664.443	601.097	610.219	510.335	563.142	563.142	586.905	543.162	886.882	571.964
1481.24	963.691	697.369	747.718	650.532	627.125	659.362	692.585	661.603	840.491	660.334	514.469	725.28	594.182	628.617	549.378	552	552	608.067	558.058	830.623	620.556
1480.14	908.898	736.374	767.224	749.184	606.545	757.36	750.726	685.6	886.329	675.893	527.078	775.749	622.11	618.917	600.965	603.444	603.444	634.369	604.019	860.467	697.814
1479.04	964.245	830.047	768.609	715.343	715.918	806.367	842.564	730.738	938.219	696.62	573.652	834	738.854	661.71	659.694	649.567	649.567	658.946	591.287	859.847	773.323
1477.93	921.328	822.882	884.693	843.378	765.211	854.336	896.018	790.312	1062.55	730.072	628.768	878.622	771.97	680.481	699.771	758.231	758.231	717.815	588.913	908.212	824.497
1476.83	913.991	882.34	972.064	932.887	811.534	863.545	945.07	818.21	1127.87	762.996	662.156	929.882	791.145	711.588	750.893	723.737	723.737	745.798	679.697	918.172	829.514
1475.72	899.883	1008.38	1011.13	948.818	801.756	1000.17	989.348	874.252	1189.51	817.506	673.259	988.672	886.907	731.601	816.091	726.354	726.354	849.204	827.942	975.772	887.588
1474.62	933.183	997.776	1020.01	937.592	917.898	975.717	1031.19	898.393	1208.95	883.555	666.971	1027.75	872.986	788.209	860.042	762.881	762.881	861.728	831.274	1005.57	895.133
1473.51	871.683	942.781	1030.39	1041.74	844.174	1037.89	1020.7	942.969	1198.78	938.436	672.742	1075.61	977.398	835.999	895.226	804.693	804.693	867.391	842.651	1035.35	903.333
1472.41	876.206	998.76	1037.76	971.695	881.596	1018.53	1035.82	955.657	1165.32	978.93	685.922	1080.19	996.522	901.581	906.315	867.676	867.676	960.438	851.725	1079.67	902.385
1471.3	862.115	955.732	1043.62	992.13	898.358	994.085	992.079	979.884	1139.52	1021.76	676.621	1068.11	958.236	955.523	913.994	921.104	921.104	984.927	889.522	1088.27	911.248
1470.2	875.095	948.552	1028.37	1030.65	906.265	1008.35	984.957	972.938	1123.46	1048.62	720.149	1036.03	937.356	987.873	946.202	961.803	961.803	1000.84	973.259	1073.07	935.952
1469.09	888.072	934.551	1049.29	934.648	969.208	1017.52	1001.53	925.812	1068.05	1063.4	739.707	1014.68	977.343	994.308	959.139	977.077	977.077	1056.14	957.035	1160.99	970.378
1467.98	877.367	968.315	960.222	966.38	882.766	944.225	959.671	892.738	1063.54	1079.48	771.771	1000.52	984.284	1010.71	954.829	1024.1	1024.1	1044.64	1006.28	1098.2	987.031
1466.88	875.121	906.564	1035.38	955.167	863.162	977.833	925.675	880.198	1066.18	1085.38	809.527	983.017	984.27	1002.16	932.29	1041.48	1041.48	1036.58	980.867	1160.97	969.519
1465.77	812.018	911.334	1017.14	886.347	925.095	943.243	876.675	859.128	1060.92	1087.06	835.564	955.918	932.118	977.294	902.652	1018.63	1018.63	1006.26	916.434	1155.02	945.566
1464.66	831.755	897.35	1022.99	953.083	874.062	908.667	856.048	847.039	1069.43	1102.05	840.888	949.062	867.824	946.081	897.494	982.041	982.041	999.915	905.972	1186.06	973.815
1463.56	827.828	910.642	992.707	850.413	871.162	884.276	833.126	821.043	1090.97	1110.25	829.623	937.267	879.991	922.029	868.338	1009.99	1009.99	1005.55	903.546	1156.33	960.064
1462.45	803.627	923.929	1043.72	976.967	908.515	921.938	799.932	817.143	1072.81	1127.9	805.32	955.729	935.577	893.739	865.699	1033.7	1033.7	958.148	909.152	1184.71	976.077
1461.34	811.53	913.357	950.234	811.118	866.347	936.197	813.381	831.644	1064.31	1139.82	779.897	942.344	902.577	896.368	850.95	1029.9	1029.9	975.759	863.135	1174.8	956.728
1460.24	750.185	911.307	993.715	971.492	845.785	918.932	818.11	843.446	1111.13	1119.89	750.992	980.301	871.324	905.264	849.906	984.879	984.879	974.554	825.163	1197.89	929.062
1459.13	774.98	847.941	969.477	954.653	860.552	872.194	850.941	827.506	1151.19	1116.7	743.777	978.197	928.618	927.389	865.155	1015.98	1015.98	990.448	898.439	1140.48	968.831
1458.02	771.065	868.041	990.375	900.589	872.371	898.651	857.703	819.205	1181.42	1122.08	724.647	998.489	852.246	970.941	888.768	972.027	972.027	1040.52	900.602	1287.6	981.162
1456.91	736.768	864.298	979.682	933.399	836.124	881.403	841.719	821.729	1185.89	1119.54	729.843	1003.64	852.256	985.045	908.427	981.982	981.982	1020.51	934.862	1288.23	1008.18
1455.8	744.675	840.127	968.993	932.365	844.02	976.938	826.941	811.63	1166.41	1124.37	758.149	1007.37	845.327	993.69	908.733	1052.15	1052.15	1038.09	994.324	1245.34	1018.68
1454.7	666.523	848.304	971.839	870.442	870.542	922.096	801.024	798.953	1159.46	1142.61	798.203	981.672	883.501	990.674	910.866	1014.56	1014.56	1014.67	964.384	1297.41	1035.5
1453.59	725.051	786.709	931.093	917.896	813.727	958.682	806.482	777.957	1124.92	1159.49	801.198	958.203	756.897	990.888	905.667	1049.84	1049.84	1027.13	921.853	1290.13	1067.35
1452.48	738.015	811.905	962.498	842.474	790.258	917.066	768.849	762.083	1104.39	1161.35	828.005	931.406	786.404	974.054	889.402	1031.27	1031.27	1010.55	928.593	1372.5	1058.89
1451.37	766.152	808.174	933.789	907.947	830.493	908.968	773.25	749.029	1056.43	1167.47	831.137	917.475	791.628	966.674	885.219	1005.31	1005.31	1023	955.945	1387.62	1059.58
1450.26	770.674	773.832	924.621	740.163	806.048	895.798	764.218	728.088	1048.06	1149.02	830.007	874.48	803.784	960.041	866.624	973.025	973.025	1054.23	907.714	1355.29	1027.37
1449.15	792.051	782.012	950.002	842.806	753.204	883.648	769.792	708.395	1033.78	1132.26	816.702	885.398	783.007	953.359	840.518	1079	1079	1083.74	951.087	1396.76	1017.12
1448.04	840.388	703.484	904.792	854.18	756.206	904.987	780.124	699.153	1039.64	1135.82	782.351	862.154	769.168	964.172	840.356	1018.22	1018.22	963.06	921.189	1363.13	1041.24
1446.93	824.669	762.668	885.124	903.839	723.953	871.536	753.515	709.736	1037.86	1132.47	767.901	861.052	783.055	991.971	854.851	978.572	978.572	1001.11	862.691	1436.19	1027.99
1445.82	857.818	775.944	930.014	793.601	897.312	875.626	735.954	728.894	1014.61	1150.61	765.7	838.344	746.703	985.603	849.332	1010.65	1010.65	1030.61	930.077	1411.78	1066.98
1444.71	852.21	804.507	890.836	822.99	812.186	817.853	723.974	745.474	1010.4	1192.27	766.327	856.489	800.421	986.821	846.693	1011.09	1011.09	1017.47	880.752	1533.52	1091.06
1443.6	841.55	809.276	937.209	894.011	820.067	937.542	764.523	750.088	1024.06	1236.34	779.439	884.157	824.683	1014.15	850.66	1014.69	1014.69	1033.32	926.378	1452.5	1104.89
1442.49	739.96	831.029	1000.07	953.754	843.6	876.738	806.327	761.578	1019.79	1270.97	797.957	903.571	790.076	1028.87	830.706	1040.42	1040.42	1078.14	979.993	1557.08	1106.51
1441.38	729.325	879.944	971.402	983.098	918.975	998.401	838.074	770.977	1061.28	1277.14	851.024	939.875	850.68	1029.7	829.003	1095.65	1095.65	1131.48	977.563	1599.78	1105.7
1440.26	706.909	864.322	962.241	1025.93	886.726	964.969	915.479	772.163	1094.13	1279.18	880.609	958.692	909.531	1072.4	812.664	1037.06	1037.06	1147.3	1024.29	1559.57	1095.94
1439.15	652.525	897.935	974.078	921.415	875.027	978.158	929.154	762.902	1105.82	1244.2	916.664	971.829	829.941	1061.91	803.203	1078.58	1078.58	1079.62	963.563	1565.42	1060.5
1438.04	657.055	892.498	985.91	838.304	766.53	908.274	931.592	738.772	1091.64	1204.81	926.058	984.428	829.957	1041.37	768.524	1001.05	1001.05	1037.52	979.421	1479.21	1041.94
1436.93	609.428	881.972	925.786	849.66	862.393	911.34	903.144	707.271	1114.33	1159.86	899.583	964.318	767.707	1005.7	759.89	1003.59	1003.59	1022.68	943.86	1523.21	1006.65
1435.82	541.634	779.829	943.618	832.912	782.282	879.975	833.142	678.176	1074.13	1109.17	902.222	935.127	750.442	966.617	727.109	950.32	950.32	994.234	885.466	1446.24	976.567
1434.71	551.226	769.328	917.988	843.142	795.04	906.332	788.71	635.746	1042.88	1072.67	848.296	894.674	729.725	914.089	676.588	909.705	909.705	976.011	812.245	1452.11	975.565
1433.59	594.445	746.958	841.43	809.547	759.916	864.857	701.437	607.41	1001.03	1027.83	821.887	871.507	660.614	846.888	640.581	841.737	841.737	916.937	815.559	1406.72	930.948
1432.48	513.24	692.377	859.267	682.72	649.585	809.228	681.785	560.721	991.64	972.191	793.431	832.61	570.787	799.326	574.028	828.518	828.518	885.118	751.512	1319.31	878.473
1431.37	512.747	697.155	770.767	669.386	690.684	793.084	661.59	516.178	959.305	924.799	780.318	787.089	565.668	741.766	508.532	792.155	792.155	844.802	650.962	1386.94	839.53
1430.25	512.254	649.384	718.235	643.703	693.682	806.286	631.861	496.585	940.035	871.129	760.146	755.982	489.714	696.109	459.96	765.273	765.273	797.696	671.423	1396.76	804.477
1429.14	515.121	581.292	716.624	582.1	676.175	763.849	634.132	486.227	908.944	841.111	718.321	707.867	380.968	672.41	407.873	723.676	723.676	738.699	592.604	1302.83	746.185
1428.03	462.549	591.172	774.884	670.948	563.987	731.541	599.502	470.406	900.791	788.09	676.783	680.797	444.969	636.763	374.939	682.094	682.094	713.742	550.322	1197.12	668.84
1426.91	482.221	634.931	716.395	555.488	560.174	739.691	558.092	455.381	887.825	730.206	636.219	657.243	401.888	588.986	344.671	569.031	569.031	692.196	521.742	1168.9	664.158
1425.8	443.108	553.328	728.251	655.532	534.894	661.907	535.649	430.077	931.094	698.427	597.999	624.727	409.069	539.334	328	635.767	635.767	662.157	513.702	1076.38	630.802
1424.69	444.306	553.046	717.662	579.387	518.404	727.682	519.364	414.872	927.367	647.519	588.76	619.639	399.13	514.253	301.58	567.948	567.948	564.13	438.391	1019.32	608.762
1423.57	457.254	552.764	632.294	593.013	564.349	718.649	526.94	390.074	917.615	614.249	558.718	600.784	394.373	499.377	284.567	546.39	546.39	554.523	466.849	1046.26	583.098
1422.46	423.203	555.867	666.589	595.417	474.714	719.723	473.574	385.31	916.684	581.051	579.082	584.248	429.304	464.185	283.919	485.966	485.966	519.428	424.629	927.576	543.226
1421.34	417.691	503.113	666.484	535.026	474.819	617.754	508.824	378.462	913.167	560.005	588.136	552.593	396.941	454.845	253.41	442.371	442.371	552.309	336.841	928.288	530.952
1420.23	435.669	523.148	648.441	578.924	457.376	676.42	527.088	357.867	878.552	560.346	582.993	552.237	405.987	473.976	239.992	473.36	473.36	452.678	393.786	859.954	519.34
1419.11	410.027	483.955	634.888	534.252	515.968	622.97	519.531	349.609	827.146	569.689	575.231	535.899	401.233	488.333	251.316	442.384	442.384	480.464	372.108	895.616	483.962
1418	491.732	485.377	578.005	475.027	468.312	594.781	511.815	313.594	801.363	580.764	549.011	529.821	405.103	502.201	263.817	483.86	483.86	470.882	343.605	813.293	446.708
1416.88	506.333	498.637	583.892	507.707	416.776	560.546	494.85	296.762	773.429	577.123	521.865	510.658	410.695	515.345	272.077	425.601	425.601	435.837	372.049	841.089	422.022
1415.77	544.399	464.544	588.284	521.329	423.71	575.78	508.332	326.378	740.983	564.574	512.83	509.351	436.968	499.197	280.596	433.481	433.481	416.082	399.344	846.599	426.864
1414.65	594.799	459.205	526.961	427.417	379.993	557.708	548.677	337.562	717.716	549.855	491.607	499.438	421.875	480.588	284.165	432.963	432.963	433.674	417.523	766.956	406.719
1413.53	710.84	477.534	529.868	457.848	456.073	569.91	574.116	346.678	724.049	520.15	464.339	490.91	446.414	467.035	291.711	433.352	433.352	461.44	350.336	737.114	387.889
1412.42	746.408	451.914	549.197	496.108	372.449	553.863	595.913	356.893	690.551	508.208	439.899	469.258	464.054	464.025	303.577	440.457	440.457	536.699	367.38	740.026	418.92
1411.3	776.939	534.45	610.313	514.201	384.642	544.881	591.502	375.767	696.148	500.425	430.593	472.796	500.633	455.382	330.583	458.045	458.045	498.283	330.945	702.345	445.408
1410.18	944.807	549.376	598.279	458.832	491.24	507.754	616.72	420.813	694.38	520.025	395.529	485.192	487.262	460.851	367.023	430.543	430.543	483.626	367.323	768.102	481.871
1409.07	1028.88	587.945	635.49	590.054	455.723	615.981	640.241	444.591	677.3	576.622	367.459	536.61	523.824	495.144	414.379	479.579	479.579	533.406	438.944	753.994	526.815
1407.95	1263.61	638.322	696.556	652.977	499.028	618.329	676.259	482.659	717.618	646.898	386.406	571.407	582.751	551.528	482.918	459.42	459.42	537.397	473.015	852.434	566.975
1406.83	1384.43	754.535	760.584	677.842	538.425	709.364	709.449	534.129	771.624	706.058	398.049	640.101	682.961	591.35	540.789	532.535	532.535	560.03	474.104	788.597	622.72
1405.71	1567.13	789.668	796.253	766.451	686.737	758.045	779.28	640.275	821.993	782.236	449.062	725.165	779.693	662.518	633.389	628.675	628.675	709.754	570.672	867.374	677.376
1404.6	1662.74	819.724	864.711	862.859	791.236	862.118	936.545	788.648	963.662	866.514	511.525	835.612	864.348	741.72	739.42	678.688	678.688	803.512	645.613	892.501	741.869
1403.48	1637.85	988.155	1015.13	950.284	806.251	1007.45	1108.33	917.831	1139.37	951.338	582.177	994.631	1048.74	836.063	858.666	791.524	791.524	839.637	755.748	899.309	783.287
1402.36	1602.93	1072.16	1117.81	1074.57	967.068	1179.92	1302.07	1052.33	1340.35	1029.48	658.541	1175.66	1122.99	953.839	978.127	878.14	878.14	848.65	921.509	945.341	883.916
1401.24	1504.47	1307.96	1332.21	1261.4	1204.6	1335.21	1465.71	1193.53	1537.42	1128.5	732.536	1348.17	1233.33	1091.87	1126.84	1004.51	1004.51	1004.99	946.367	1046.26	1005.14
1400.12	1402.7	1428.98	1413.93	1448.16	1270.06	1473.33	1639.75	1335.4	1708.21	1225.48	800.199	1514.5	1424.42	1205.47	1267.4	1103.62	1103.62	1203.59	1047.3	1139.29	1103.18
1399	1215.7	1612.35	1491.15	1517.54	1373.38	1570.13	1756.11	1446.54	1840.56	1331.44	851.134	1647.51	1558.73	1307.19	1407.65	1199.55	1199.55	1366.58	1187.94	1217.93	1224.03
1397.88	1159.16	1707.98	1651.74	1637.16	1541.75	1723.25	1802.19	1513.09	1888.44	1446.9	910.827	1719.7	1553.78	1368.66	1486.84	1275.56	1275.56	1400.88	1276.31	1263.87	1337.86
1396.77	1057.51	1682.2	1652.94	1695.32	1511.93	1789.79	1835.33	1540.24	1891.21	1531.76	981.75	1712.39	1641.62	1427.11	1522.6	1358.87	1358.87	1463.93	1398.69	1358.12	1418.92
1395.65	935.85	1646.31	1649.68	1690.92	1526.8	1701.38	1761.05	1520.81	1815.75	1583.85	989.316	1657.85	1514.7	1422.95	1515.17	1446.34	1446.34	1508.35	1406.41	1366.15	1469.8
1394.53	864.354	1546.4	1612.18	1541.4	1477.58	1622.06	1656.14	1444.36	1705.5	1592.39	1007.36	1560.11	1501.18	1433.5	1472.21	1442.78	1442.78	1491.85	1372.16	1392.46	1476.58
1393.41	774.511	1443.16	1498.79	1353.98	1311.91	1521.65	1520.85	1358.42	1600.65	1575.2	969.718	1409.55	1303.92	1384.84	1377.14	1400.54	1400.54	1502.43	1351.53	1373.06	1409.3
1392.29	637.94	1254.05	1425.62	1325.1	1159.89	1387.09	1361.72	1236.57	1473.56	1509.69	936.204	1290.1	1226.92	1298.15	1231.73	1367.73	1367.73	1306.71	1242.44	1413.72	1291.1
1391.17	594.924	1196.37	1345.04	1212.54	1142.79	1225.44	1208.82	1107.39	1361.28	1416.43	860.072	1164.81	1069.27	1224	1085.78	1287.89	1287.89	1300.41	1179.89	1339.52	1197.66
1390.05	515.199	1093.31	1155.91	1075.49	907.423	1125.16	1072.1	999.189	1259.07	1319.82	757.847	1026.2	1007.78	1118.88	954.768	1154.79	1154.79	1187.62	1106.02	1254.9	1062.21
1388.93	515.62	970.099	1081.35	974.182	825.39	1025.93	972.923	874.401	1150.15	1197.96	680.773	910.223	829.637	1008.71	834.713	1082.33	1082.33	1110.37	978.902	1248.6	939.914
1387.8	409.237	897.43	971.144	821.614	779.267	930.744	845.815	759.827	1067.98	1085.55	594.369	812.83	802.535	905.068	729.367	963.939	963.939	1011.17	815.567	1174.47	893.065
1386.68	403.004	806.276	927.871	791.749	750.612	877.785	753.368	667.799	970.057	987.352	528.002	729.773	627.925	792.888	611.876	860.214	860.214	856.272	781.465	1082.12	813.352
1385.56	368.415	668.041	868.265	759.666	561.055	798.734	712.906	584.719	914.99	907.202	485.843	667.116	554.565	708.575	530.919	771.147	771.147	780.811	682.801	1064.12	745.257
1384.44	310.488	624.068	756.676	705.305	521.79	687.581	638.7	509.305	873.129	829.089	443.009	613.163	505.238	629.568	468.563	735.361	735.361	727.332	635.144	956.174	712.251
1383.32	375.985	543.107	715.353	667.682	462.191	611.608	590.642	450.514	802.125	745.166	416.674	547.772	406.214	601.674	391.117	647.397	647.397	727.903	561.458	925.173	658.343
1382.2	319.746	542.899	636.907	494.146	359.985	598.896	534.453	427.215	714.365	685.681	359.562	504.827	410.069	552.902	332.501	605.386	605.386	613.683	478.741	806.873	568.931
1381.07	300.201	435.08	610.474	469.945	366.305	588.199	486.623	419.976	656.74	613.608	358.377	473.522	393.359	499.748	272.294	493.477	493.477	567.017	401.715	801.969	503.694
1379.95	273.997	428.167	529.107	462.456	298.05	534.359	443.348	379.427	600.636	556.403	313.25	431.066	356.093	476.699	243.771	506.806	506.806	481.556	368.859	752.775	443.949
1378.83	324.457	392.682	513.097	426.022	308.252	421.353	438.608	343.848	524.018	497.474	284.595	380.228	332.547	441.994	212.989	437.726	437.726	456.862	311.12	672.347	379.697
1377.71	281.598	333.685	439.201	395.169	238.098	400.665	390.098	288.098	489.084	443.711	270.566	320.946	285.031	404.9	198.115	393.702	393.702	384.837	309.973	641.43	354.735
1376.58	343.698	399.042	435.087	312.012	152.482	394.023	349.17	243.82	435.287	403.934	242.772	295.512	259.795	358.322	184.974	349.694	349.694	417.405	251.135	665.204	332.397
1375.46	414.102	341.744	380.524	316.806	197.544	350.287	356.06	209.094	421.496	382.262	236.336	263.374	220.871	336.963	161.657	332.809	332.809	342.042	231.904	619.983	299.25
1374.34	461.168	321.418	394.226	348.303	104.226	281.507	328.883	190.427	438.135	361.884	232.814	250.365	241.877	293.023	149.639	339.905	339.905	320.657	221.726	572.176	280.932
1373.21	469.927	294.383	409.407	338.627	124.128	297.944	322.85	180.351	461.691	351.031	211.954	243.03	202.971	258.416	164.345	303.228	303.228	383.56	184.419	615.47	282.939
1372.09	518.631	344.588	359.328	315.611	148.858	294.334	361.627	191.472	445.239	349.734	206.827	232.992	242.797	273.225	159.558	266.566	266.566	296.45	213.817	623.627	252.873
1370.97	563.989	300.772	362.648	279.256	184.217	314.77	412.286	230.163	454.633	348.548	201.824	260.78	229.57	284.863	181.695	263.253	263.253	329.005	174.264	506.911	235.727
1369.84	597.683	362.705	407.478	244.03	182.822	386.287	461.005	299.721	494.136	342.655	227.924	296.121	230.033	319.914	207.691	276.609	276.609	272.262	153.936	621.723	225.488
1368.72	476.651	433.006	513.063	411.143	239.427	402.694	519.036	329.204	516.02	358.993	215.367	365.917	317.72	335.477	241.263	300.374	300.374	370.501	233.033	524.559	223.701
1367.59	453.799	479.793	497.087	389.241	265.084	503.205	590.276	369.978	572.949	379.988	237.386	429.66	395.114	365.16	275.704	306.428	306.428	372.712	211.392	563.925	251.431
1366.47	477.517	487.983	558.166	531.819	281.069	536.604	618.68	421.67	619.763	398.027	248.651	478.601	373.322	399.765	313.962	344.754	344.754	373.24	272.299	517.499	293.023
1365.34	418.095	536.42	549.596	547.683	381.101	598.018	660.947	448.781	658.106	415.97	239.883	538.882	474.609	423.486	352.484	348.719	348.719	427.638	303.827	526.968	315.571
1364.22	463.423	581.485	582.503	494.673	324.61	578.348	669.099	459.621	683.987	447.479	242.57	559.877	504.082	467.029	381.766	391.187	391.187	471.918	322.927	563.722	360.483
1363.09	443.914	614.798	588.741	619.384	324.156	579.697	627.383	469.784	692.214	461.943	246.873	587.429	460.07	479.428	392.805	394.102	394.102	490.939	379.266	562.788	376.651
1361.97	441.03	492.218	571.287	507.524	364.257	560.036	622.626	465.745	711.491	490.709	232.484	586.152	539.076	480.421	408.292	431.343	431.343	491.446	350.947	620.3	418.134
1360.84	443.133	468.557	536.077	550.033	294.285	536.384	646.652	425.084	694.39	508.548	263.969	556.48	503.615	481.139	392.552	441.533	441.533	451.582	341.822	625.854	412.347
1359.71	438.59	491.819	571.921	482.63	277.427	534.74	634.216	410.454	678.359	517.616	277.93	543.671	471.582	468.652	388.226	420.521	420.521	460.505	357.517	563.892	423.406
1358.59	397.511	431.312	538.204	501.823	329.095	513.101	627.466	411.288	682.745	517.552	272.58	521.985	504.444	475.725	364.719	441.106	441.106	452.611	348.395	601.907	414.79
1357.46	394.639	476.346	563.679	457.76	297.764	499.468	606.745	414.222	692.598	513.959	268.898	500.877	535.587	430.507	343.089	455.447	455.447	515.333	296.426	473.789	411.002
1356.34	338.643	456.055	490.036	382.648	312.749	503.829	571.34	406.756	710.285	513.937	294.27	481.482	500.152	430.009	339.391	444.838	444.838	465.408	361.729	558.516	420.452
1355.21	325.825	452.513	545.091	490.587	346.056	489.204	546.985	416.396	706.366	520.707	290.737	470.231	515.926	457.628	350.472	450.861	450.861	467.602	263.56	519.971	425.942
1354.08	298.075	453.995	478.874	402.196	377.422	526.538	529.449	408.555	721.126	519.497	263.272	478.154	548.758	455.744	343.974	438.183	438.183	429.469	345.757	554.08	437.449
1352.95	263.699	448.782	542.78	359.296	279.576	525.899	480.62	404.47	698.545	517.566	234.931	479.172	395.639	470.807	361.665	446.283	446.283	404.789	342.282	522.035	405.634
1351.83	262.515	406.757	525.366	380.711	277.202	470.33	437.174	410.339	679.124	501.795	232.844	472.096	447.241	476.352	360.816	430.495	430.495	400.275	291.491	454.994	400.369
1350.7	249.722	403.227	463.623	409.878	304.707	489.673	421.464	374.363	658.283	481.515	220.333	472.046	405.036	466.619	351.745	382.525	382.525	427.671	326.326	562.988	397.052
1349.57	225.325	346.171	416.68	376.979	274.383	429.141	400.029	322.985	604.727	472.904	231.882	444.281	352.62	449.613	326.202	356.376	356.376	367.747	298.084	507.635	394.169
1348.44	167.777	332.619	480.552	381.765	218.057	440.501	391.789	311.603	523.682	458.992	204.235	432.225	358.179	426.471	312.033	392.511	392.511	403.535	240.576	425.089	397.624
1347.31	211.372	304.023	395.22	327.833	168.495	377.005	387.308	304.963	445.486	436.094	176.885	406.259	310.902	405.763	269.696	344.576	344.576	378.884	288.912	451.405	378.916
1346.19	211.859	268.75	397.049	320.444	183.48	336.484	355.596	303.549	392.149	398.265	144.922	348.787	261.94	359.204	240.263	351.65	351.65	329.071	293.336	418.126	360.36
1345.06	214.001	266.921	347.2	277.622	168.607	312.939	325.706	282.798	305.287	388.209	129.154	324.356	291.365	347.169	221.042	291.295	291.295	334.646	214.481	478.113	344.024
1343.93	214.488	253.394	323.942	269.139	101.752	259.478	303.454	275.138	272.043	392.188	115.077	302.336	240.722	334.878	203.278	285.931	285.931	335.186	223.418	358.084	342.836
1342.8	166.935	228.175	306.596	208.633	76.3123	262.881	321.436	264.65	283.828	378.13	102.62	288.175	242.891	325.44	174.432	291.977	291.977	308.891	154.73	486.679	337.624
1341.67	205.524	169.555	330.577	194.636	14.3107	242.355	297.846	262.119	287.464	352.314	111.047	257.724	263.791	314.615	180.603	244.11	244.11	272.546	137.809	481.903	315.267
1340.54	210.98	212.841	311.761	212.732	40.8558	256.727	297.077	238.554	312.394	333.633	159.048	238.071	255.741	304.769	184.812	271.929	271.929	294.894	153.504	404.65	299.288
1339.41	232.99	212.694	291.478	162.232	76.0492	260.131	289.993	214.312	348.131	303.578	194.751	228.252	297.056	307.698	164.919	246.885	246.885	322.263	186.061	433.535	278.629
1338.28	263.269	214.215	281.527	178.116	41.014	238.619	295.046	212.35	370.427	298.312	219.766	204.815	200.513	304.991	152.43	246.717	246.717	316.103	147.784	396.427	294.816
1337.15	237.267	214.067	271.579	318.969	110.815	268.927	326.39	194.606	396.125	287.561	212.008	191.948	218.003	307.716	153.628	268.308	268.308	361.891	184.826	455.055	276.581
1336.02	217.895	165.518	286.699	196.607	59.4404	229.492	327.694	178.913	399.033	286.671	231.446	195.38	250.797	307.269	147.548	250.53	250.53	271.96	226.35	420.548	287.464
1334.89	287.865	203.759	287.073	171.577	6.16234	256.803	327.195	171.306	399.586	292.751	194.882	178.199	203.641	299.149	141.542	318.715	318.715	312.715	192.584	410.621	321.6
1333.76	218.869	208.618	315.449	237.192	0	256.221	311.204	149.58	374.708	317.843	179.86	202.476	210.918	313.785	136.743	279.191	279.191	273.068	240.832	433.018	338.02
1332.62	219.357	230.156	326.132	249.739	23.8619	242.697	323.374	157.3	392.135	347.646	171.99	212.493	213.093	316.62	140.009	277.985	277.985	265.25	235.155	457.993	351.973
1331.49	257.874	260.025	323.553	239.079	104.402	274.968	334.973	139.129	393.417	354.421	169.849	242.374	228.865	349.372	150.115	314.042	314.042	329.422	244.077	468.743	354.969
1330.36	251.743	233.189	366.635	256.041	61.956	253.484	290.574	120.93	406.439	370.432	220.164	251.665	254.829	347.5	162.883	291.1	291.1	316.575	255.241	469.154	352.437
1329.23	262.142	213.031	390.559	217.775	56.0285	274.797	275.511	149.617	413.926	389.399	236.807	276.295	262.094	349.045	176.859	311.623	311.623	367.328	227.119	514.783	313.348
1328.1	252.707	282.891	329.074	276.699	42.4165	255.311	263.119	189.851	398.305	375.712	227.924	289.221	235.377	345.272	181.104	304.208	304.208	384.597	252.872	494.521	295.044
1326.97	244.928	212.735	354.468	305.795	64.3391	273.632	294.479	214.103	432.13	379.336	212.974	285.282	244.341	325.194	193.148	308.173	308.173	343.311	244.958	429.075	272.781
1325.83	258.628	212.587	334.225	262.024	89.1343	261.117	311.598	218.703	472.479	355.089	216.449	260.772	290.664	330.615	203.463	308.002	308.002	340.509	247.144	437.246	229.072
1324.7	315.264	250.756	328.706	217.166	69.7742	289.373	320.678	209.189	500.565	344.423	227.839	252.367	240.187	326.847	213.731	299.56	299.56	307.608	242.599	417.016	248.652
1323.57	251.335	243.938	301.119	319.088	194.354	270.896	322.442	205.011	511.461	338.823	200.614	253.873	276.308	310.276	209.444	294.222	294.222	346.612	214.507	374.853	238.447
1322.44	255.12	253.776	373.573	337.124	95.3562	329.952	331.286	193.825	519.507	316.303	197.083	273.56	290.351	313.603	207.718	283.719	283.719	258.559	258.183	403.678	249.975
1321.3	310.076	243.631	356.284	254.775	97.1111	338.305	381.649	208.036	509.74	305.535	189.894	281.398	226.326	300.962	192.673	302.153	302.153	279.175	230.1	353.794	264.408
1320.17	282.492	235.154	337.531	300.389	85.4402	322.81	397.789	187.897	521.259	282.986	199.359	309.54	257.341	309.163	172.689	255.494	255.494	299.782	190.819	346.496	267.318
1319.04	329.173	248.317	311.435	311.808	91.9981	304.342	403.813	186.99	558.143	290.521	221.432	316.109	247.632	286.531	158.368	240.876	240.876	298.665	207.585	346.943	289.792
1317.9	288.4	304.741	361.785	282.429	174.283	314.683	415.915	234.45	565.027	284.745	206.787	337.791	232.837	268.174	148.031	215.933	215.933	305.899	248.991	317.73	302.024
1316.77	361.454	239.689	325.407	270.701	135.775	310.125	417.526	250.752	558.627	284.173	186.967	336.867	231.616	232.96	141.943	233.337	233.337	242.989	204.131	338.81	295.051
1315.63	350.374	242.863	365.449	323.995	172.983	298.619	439.401	260.182	561.037	286.774	188.721	345.793	208.353	207.344	121.377	229.053	229.053	250.231	158.166	343.123	253.456
1314.5	410.2	297.593	334.961	356.339	102.875	329.802	426.551	274.508	565.509	268.803	174.69	328.874	217.308	198.261	118.698	226.838	226.838	285.852	159.251	297.18	224.039
1313.37	422.195	269.161	351.487	369.943	140.083	293.487	413.234	256.034	581.849	250.98	179.529	343.679	209.311	190.773	125.532	182.312	182.312	229.658	168.172	394.274	241.49
1312.23	430.891	315.554	398.847	297.632	147.587	310.768	411.919	261.836	591.939	245.414	178.036	384.51	247.069	184.608	137.973	159.471	159.471	300.316	133.437	268.47	236.652
1311.09	563.178	273.831	412.42	332.17	189.569	344.91	419.514	252.514	569.563	224.885	185.612	407.648	217.047	199.787	139.339	192.347	192.347	239.136	134.529	295.986	261.528
1309.96	553.721	346.796	370.202	340.268	203.766	386.973	436.651	256.47	582.354	221.556	185.46	444.444	190.423	208.881	139.178	186.015	186.015	264.725	201.636	369.849	289.07
1308.82	601.924	334.992	376.435	389.093	227.53	372.492	493.87	260.269	635.169	236.418	213.861	496.895	240.019	240.291	157.793	202.373	202.373	226.924	164.677	392.184	308.119
1307.69	651.756	394.628	422.29	418.094	238.851	436.351	531.336	295.57	686.82	261.568	221.635	544.976	286.211	267.29	199.066	202.231	202.231	289.195	190.372	396.494	342.058
1306.55	591.239	406.073	453.454	456.985	267.387	494.236	577.13	344.993	745.741	296.488	252.036	596.852	288.37	310.823	233.634	215.488	215.488	299.755	233.947	416.244	356.033
1305.42	542.272	414.193	450.869	449.657	292.092	489.657	602.851	409.422	783.563	354.17	275.927	629.975	354.848	349.595	279.705	302.948	302.948	370.324	254.03	459.152	354.784
1304.28	499.906	546.837	496.684	545.732	359.833	573.278	646.833	463.339	812.253	402.491	301.98	659.761	428.071	402	321.603	305.879	305.879	362.534	324.41	508.479	345.994
1303.14	427.932	536.667	582.075	608.779	379.732	604.356	644.998	533.812	840.625	449.158	285.996	644.354	457.276	417.864	365.905	434.501	434.501	453.062	364.588	566.791	384.455
1302.01	334.594	584.592	623.451	647.611	439.784	661.178	661.59	579.145	833.226	469.14	291.106	657.119	461.094	442.644	408.371	433.287	433.287	506.904	386.871	563.352	457.606
1300.87	335.066	634.158	626.7	643.554	440.543	673.41	679.625	601.636	809.634	504.974	308.487	678.671	461.529	451.612	412.717	472.239	472.239	479.105	448.25	581.773	507.772
1299.73	337.184	572.544	640.207	618.614	447.994	601.466	671.608	586.184	729.872	503.111	316.1	654.084	460.273	454.211	397.903	431.892	431.892	479.628	415.775	628.472	525.484
1298.59	234.048	522.564	605.355	607.974	380.909	523.61	647.564	560.961	699.615	478.568	304.136	618.255	421.822	441.522	371.327	452.302	452.302	446.851	388.899	594.18	553.678
1297.46	209.876	479.236	544.144	618.212	336.776	522.002	631.236	504.995	636.58	450.841	322.018	563.435	380.004	426.413	338.719	422.267	422.267	454.04	344.165	527.769	565.728
1296.32	169.273	406.077	477.098	451.581	309.861	455.077	594.761	475.502	570.22	405.701	318.084	507.201	328.062	404.663	285.657	387.1	387.1	451.241	338.525	520.493	534.314
1295.18	150.054	311.392	437.902	411.321	267.669	390.154	547.925	439.553	513.512	374.249	332.912	447.068	277.828	383.277	233.847	339.597	339.597	341.934	244.703	491.377	476.861
1294.04	168.639	311.226	362.116	342.528	257.967	341.086	499.359	379.137	467.105	349.732	335.248	377.497	227.614	343.02	186.842	325.033	325.033	297.56	206.72	477.689	403.688
1292.9	162.572	312.717	346.38	305.601	174.755	331.603	444.432	320.838	459.743	310.891	299.789	304.131	172.352	307.542	149.891	279.619	279.619	304.773	184.373	470.427	329.222
1291.77	125.295	208.16	291.13	287.351	118.302	295.421	410.34	299.04	410.639	277.821	246.198	245.106	149.198	260.722	121.399	243.478	243.478	248.781	167.613	433.639	284.752
1290.63	132.378	183.162	284.194	228.499	91.4581	235.522	369.648	272.507	387.019	234.416	221.776	226.862	181.775	241.814	113.651	217.632	217.632	231.057	157.552	381.461	254.167
1289.49	167.375	141.611	293.355	217.953	106.61	235.95	348.314	233.701	368.024	212.926	199.98	218.967	146.811	209.474	93.2477	167.124	167.124	188.4	134.112	344.704	210.439
1288.35	108.776	121.603	220.593	238.134	41.624	170.156	342.973	207.794	329.418	174.38	160.217	199.628	132.117	187.748	95.5658	155.693	155.693	205.605	58.2803	311.815	179.375
1287.21	89.5946	139.685	240.001	259.402	64.4127	188.385	314.015	186.53	345.509	146.766	136.857	174.718	100.551	173.193	93.6175	113.437	113.437	133.053	63.8532	251.993	179.002
1286.07	99.9627	132.929	193.598	198.411	-14.8445	176.967	320.726	174.285	315.098	124.073	121.036	171.419	128.053	180.081	99.5443	135.925	135.925	141.953	120.697	208.873	177.758
1284.93	70.9453	94.7272	150.136	217.487	-57.8435	105.292	320.701	173.268	287.94	129.051	113.812	177.177	135.3	188.532	89.6207	83.4169	83.4169	150.85	70.5391	224.76	158.772
1283.79	109.205	101.22	169.547	204.767	70.7793	165.007	310.899	166.59	295.324	147.254	110.179	168.281	127.366	200.469	91.6354	129.523	129.523	138.15	73.882	186.792	147.935
1282.65	99.8805	135.838	172.875	199.725	-1.75956	169.401	319.055	143.174	296.155	163.221	83.5643	170.731	143.044	197.185	90.1995	116.058	116.058	150.367	87.2496	193.708	118.053
1281.51	88.9211	76.1523	206.888	125.642	22.933	144.173	317.763	130.46	324.507	174.686	52.4157	172.393	146.915	200.333	99.3627	108.757	108.757	160.919	67.2005	217.286	124.735
1280.37	79.6055	56.1826	147.387	108.564	55.2398	57.7527	344.116	139.043	311.526	180.794	52.5613	179.072	160.898	192.357	110.59	124.042	124.042	159.846	157.399	210.099	146.31
1279.23	53.8998	65.9852	134.65	167.084	-22.9683	48.3469	337.401	127.535	316.59	179.221	66.0457	173.244	112.516	174.683	123.333	152.661	152.661	168.734	172.972	187.54	152.863
1278.09	65.9027	36.1049	143.824	111.671	-3.0445	74.4681	338.379	105.76	296.947	169.148	61.582	153.006	123.131	147.106	130.672	121.76	121.76	156.044	88.3584	139.368	145.106
1276.94	63.1524	74.0083	155.916	114.323	-24.0688	79.8631	336.377	67.9406	276.376	151.689	71.099	141.045	130.374	113.021	129.833	146.269	146.269	106.856	72.7799	223.144	153.853
1275.8	22.7185	63.9699	118.367	79.7447	-38.4254	63.5542	275.616	50.7672	266.194	138.84	84.6005	130.282	129.19	100.43	108.612	114.355	114.355	143.951	16.0351	164.741	149.72
1274.66	15.0631	52.2828	108.566	97.7287	-54.6737	53.1701	253.148	50.6814	257.255	132.162	88.0734	125.646	104.431	106.389	89.4268	61.9464	61.9464	152.837	80.5766	149.895	127.598
1273.52	63.0993	42.252	92.931	35.8087	-57.5906	78.2872	199.339	46.0629	226.974	129.077	103.348	105.922	93.1512	99.8853	48.6986	78.2514	78.2514	95.3865	67.2341	132.496	94.2438
1272.38	30.8763	15.7074	113.779	83.3413	-75.7301	64.9471	180.004	36.6384	215.664	131.558	100.042	76.4725	150.901	115.635	17.1347	51.4966	51.4966	72.7762	82.8113	127.902	88.687
1271.23	18.3137	27.156	102.525	75.0587	-66.2718	9.22875	172.304	49.9678	220.126	121.399	76.7891	64.5084	92.4871	101.483	5.81597	32.9514	32.9514	71.7247	0.53781	156.581	52.3346
1270.09	20.4875	23.74	107.32	76.6244	-28.2799	43.2101	174.784	35.0301	236.563	100.387	57.6429	62.6343	69.4365	106.52	-7.12653	48.2291	48.2291	54.0999	5.00584	128.957	65.6829
1268.95	-0.2513	-17.644	78.5737	32.2559	-108.228	10.1786	197.584	68.5719	226.049	69.7927	62.4551	71.9162	71.6335	79.4958	-15.7936	49.1581	49.1581	120.994	48.3737	87.2729	50.843
1267.8	28.108	-26.002	105.241	38.2043	-84.5034	-1.16778	227.448	87.2461	186.607	45.3875	56.276	85.2659	19.9971	70.9542	-9.88083	6.04075	6.04075	32.125	22.8281	137.688	50.5242
1266.66	4.10392	21.7507	48.8107	62.7404	-97.8566	-3.64405	280.521	89.9284	180.949	25.0596	38.2031	113.504	30.6139	53.5959	-3.92064	20.2936	20.2936	50.9619	47.2921	121.596	60.8132
1265.52	45.5382	-11.3603	52.1552	76.3337	-91.2491	34.2542	283.255	73.1744	175.177	26.0629	12.0546	124.396	89.9935	52.2603	-14.2124	20.2045	20.2045	18.4496	16.2028	100.394	67.3954
1264.37	29.7184	-24.6638	74.4425	69.1616	-67.5315	-28.2858	250.952	68.1902	175.264	27.4306	5.7199	135.71	56.879	67.8053	-14.8678	21.2966	21.2966	35.6267	55.0981	145.671	50.7441
1263.23	-25.3393	-23.1185	42.8161	40.1363	-32.4256	-34.6939	219.705	69.7529	190.559	33.2627	3.56257	132.338	35.5431	55.6825	0.43155	17.8561	17.8561	99.1517	10.6947	109.138	35.1295
1262.09	-14.9825	-44.6598	49.0744	-3.07636	-37.2247	-4.68264	182.046	67.7893	189.971	33.2641	12.0995	110.666	20.9394	41.3133	-5.34137	46.1412	46.1412	-6.18008	17.381	114.788	26.4164
1260.94	13.3493	-16.7325	58.2433	7.24857	-55.3178	-45.5314	176.228	54.3755	214.761	52.0404	13.6028	94.4043	60.114	45.9029	1.78227	1.76906	1.76906	40.7815	20.7352	79.5571	38.0316
1259.8	17.1586	-41.5637	14.9905	43.7796	-63.9071	-9.62605	136.46	41.1107	244.726	47.5544	26.7034	69.9993	28.7107	33.3206	5.50564	4.47129	4.47129	48.0149	40.7357	120.975	51.0804
1258.65	19.333	-0.46278	25.6185	15.8782	-74.3909	-22.9161	105.623	18.6131	282.446	27.1878	29.6936	56.7859	93.0662	35.0938	-5.92839	-14.3066	-14.3066	55.2459	29.6604	106.19	87.1228
1257.51	21.5066	-17.049	-0.14456	-72.049	-81.0671	-4.72884	89.5177	25.0977	294.718	10.5681	36.7681	58.1052	14.6453	15.181	-14.294	0.66848	0.66848	37.6655	-15.7993	56.9412	60.2263
1256.36	-5.71964	-73.1682	26.4905	-21.333	-52.6294	-27.8473	108.037	21.5389	278.832	1.41993	56.3953	50.535	-6.65652	16.0995	-20.2842	7.45879	7.45879	28.3592	-2.45691	79.1945	53.0327
1255.21	24.2192	-63.3804	24.017	85.0216	-79.2319	14.912	106.451	19.2668	279.527	-11.224	61.6812	56.8428	20.7372	-7.16226	-33.419	-17.4434	-17.4434	-15.6635	23.0822	61.8782	62.3685
1254.07	36.1875	-35.4808	40.455	10.2215	-91.5982	-44.569	93.9531	8.53723	262.403	-17.0055	74.0813	51.0092	61.5479	8.65725	-57.1311	-25.9832	-25.9832	16.6275	-24.2942	63.7067	55.7353
1252.92	15.5039	-32.2898	4.54873	18.3569	-118.181	-6.73576	96.3086	-1.3151	236.575	-14.6972	87.5627	48.693	23.4692	15.7217	-54.5447	-14.0832	-14.0832	1.08459	-31.6261	54.0561	31.7649
1251.78	9.51803	-30.7462	19.7946	47.2117	-79.3156	-3.3056	94.5852	10.8362	216.935	-8.76732	90.7986	60.8485	8.89526	10.3849	-29.8832	-7.29614	-7.29614	46.6893	-17.896	36.7564	16.195
1250.63	11.5219	-29.2032	32.1274	-0.27357	-122.957	18.7885	139.122	16.2299	212.016	-11.1487	83.6432	79.4836	61.4303	19.7445	-14.8642	-13.7909	-13.7909	16.2779	34.6154	38.5941	-12.5225
1249.48	11.8411	-57.2821	38.6412	20.9438	-98.3228	-1.35942	176.6	30.77	193.28	2.70776	74.7889	111.587	53.5644	47.7047	0.1333	6.2701	6.2701	55.2561	-25.9035	69.7596	-2.66311
1248.34	54.5708	-27.7644	43.6996	36.7039	-115.402	19.7446	162.299	17.2586	168.138	9.56011	68.0518	110.667	55.7633	65.8976	-8.16829	-19.6259	-19.6259	-8.17579	-42.0893	51.1939	30.2841
1247.19	17.3723	-16.3529	67.6466	29.0396	-73.7184	-44.5775	184.187	27.4919	175.872	17.3779	50.4832	104.226	44.5484	55.5658	-10.2093	-34.2824	-34.2824	19.2345	32.5497	60.678	41.0957
1246.04	22.5824	-37.8397	59.6228	-16.7104	-120.166	-23.473	208.132	33.0734	176.836	20.9516	38.0543	109.513	40.0433	47.9427	-18.2453	-21.3742	-21.3742	33.4277	20.7896	47.2199	18.0739
1244.9	45.7235	-44.5189	54.5088	70.4639	-83.2259	7.43983	235.225	31.3058	180.838	31.4427	47.3377	100.94	52.3014	33.629	-22.0927	-9.49183	-9.49183	31.1115	-27.4977	1.91702	17.5142
1243.75	59.0763	-42.9752	36.325	37.7932	-73.771	9.8831	180.098	41.2905	173.755	14.5898	50.5444	100.429	42.7699	27.564	-29.0042	-19.0407	-19.0407	27.1444	44.8849	44.5293	33.0308
1242.6	38.2025	-43.0759	18.1497	-2.48976	-20.7525	-13.1813	162.26	29.3751	165.643	15.644	65.9106	89.5494	41.6202	33.9223	-37.251	-9.20379	-9.20379	-18.0693	-18.8818	47.6454	40.1628
1241.45	-8.73375	-0.44617	49.3406	-44.9356	-17.9324	1.03748	149.975	35.4816	163.468	29.6073	61.3452	56.3781	32.0958	26.2776	-18.4411	-46.2887	-46.2887	60.4621	-6.27488	41.847	23.7981
1240.3	20.9134	-38.3478	71.8113	-32.9359	-89.8946	-13.1898	152.21	39.3724	184.601	34.0801	72.9143	62.9945	52.7211	7.48671	-8.11099	-11.9762	-11.9762	74.6382	9.64676	29.6854	17.5677
1239.16	47.2914	-33.5207	33.3236	-106.924	-28.3817	12.7907	172.126	43.1242	189.564	33.3983	65.1139	64.2525	24.7796	2.39872	-1.52497	-32.7338	-32.7338	24.4948	3.44118	26.4399	19.4507
1238.01	36.2064	-10.6274	44.182	-3.50994	-108.829	-66.1365	163.626	39.4935	200.733	31.8949	47.2767	65.5522	82.2303	2.18901	-15.0633	-23.9215	-23.9215	41.9706	-27.0911	38.4693	42.0425
1236.86	-4.18067	2.40392	41.9808	46.5542	-44.4952	-39.1754	129.821	30.0774	209.294	34.5837	57.486	69.0729	12.4482	-6.1561	-23.8043	-18.1702	-18.1702	-21.3349	-63.1398	58.13	47.605
1235.71	59.6284	-19.0506	67.3395	22.6284	-57.7426	-27.9025	150.693	35.2616	223.016	32.2688	44.9204	68.6774	54.8196	-22.7132	-27.6388	-28.7258	-28.7258	48.887	-5.20566	42.1641	49.2133
1234.56	46.9202	-66.7634	69.4856	-20.8643	-80.4469	20.5978	192.552	25.9829	239.747	20.0208	26.963	70.8712	25.2263	-18.7289	-36.0791	-5.65609	-5.65609	-1.21263	60.4413	83.4427	52.7237
1233.41	56.998	-37.3156	57.1342	12.8621	3.71148	-14.1868	202.031	15.7022	252.71	30.4194	9.13092	69.5298	-11.0463	-6.49773	-41.842	-16.2103	-16.2103	40.9717	-8.75076	86.5563	75.129
1232.26	80.0882	-11.1609	65.0803	-33.8747	-31.2835	11.7661	181.007	30.0232	244.832	20.228	7.31569	68.4284	17.9246	14.0022	-47.9751	-33.8893	-33.8893	25.4851	12.6792	46.433	79.7821
1231.11	101.543	-22.7526	52.7349	-18.6377	-53.9713	10.2915	181.422	23.3784	220.591	11.4105	13.3936	52.9053	25.1465	39.0729	-52.1445	-25.0878	-25.0878	31.4169	39.6281	59.7244	96.6873
1229.96	51.4321	-63.8676	60.6808	-27.3158	-26.5631	2.94326	171.256	44.5136	220.662	15.7252	14.0363	32.266	50.7576	34.8623	-42.2388	-1.01889	-1.01889	11.0008	29.0162	86.9935	64.9656
1228.81	51.746	0	70.0729	9.64508	-19.0058	45.5216	191.053	45.3471	222.582	29.4509	18.7704	59.0236	76.3594	39.1416	-41.546	-13.6023	-13.6023	38.336	21.7217	90.1071	64.2501
1227.66	87.8262	-12.2321	56.2857	25.9507	-10.5056	0	195.255	61.6733	224.413	37.3098	31.9686	75.0196	0	67.4878	-33.4488	-63.8353	-63.8353	21.2189	19.9506	51.2901	40.1293
1226.51	29.6197	-1.50625	67.1238	73.7489	-39.7871	31.2572	217.154	61.2187	241.481	31.4836	51.0279	99.8677	62.3453	65.3485	-28.8284	-26.5456	-26.5456	40.3144	32.5307	11.2178	15.2876
1225.36	81.9417	22.3312	98.231	3.15751	-8.6148	-1.08557	222.541	81.3724	220.802	41.6851	89.2581	143.399	16.0722	64.4155	-13.5346	-35.0489	-35.0489	39.6601	6.4828	56.2641	21.0559
1224.21	17.2592	44.5195	68.5225	31.3977	78.2461	13.5327	249.802	89.7629	201.205	58.5691	75.6976	157.341	66.699	73.4092	-9.357	-39.4802	-39.4802	14.3281	0.30385	75.8926	23.5993
1223.05	53.3193	-5.39614	101.066	-4.42227	28.2057	30.106	309.738	92.8377	227.946	56.6127	54.7091	169.084	52.1745	88.9627	1.12025	15.071	15.071	61.3786	41.5689	56.1587	37.9819
1221.9	76.3734	-4.50786	98.8642	-5.49656	11.2124	57.426	305.737	97.5425	238.984	81.4968	62.3911	157.072	49.3429	84.3257	5.65249	2.49785	2.49785	62.3645	42.005	85.9367	36.6416
1220.75	52.3256	32.4176	99.559	18.3869	51.7927	45.6354	299.029	111.946	229.704	63.5909	60.6431	153.118	46.5138	69.0367	17.3481	9.24318	9.24318	99.5243	21.4911	70.0172	44.4667
1219.6	83.4894	-25.6552	52.5157	58.5352	77.2638	35.8049	264.221	94.4324	231.756	52.9055	79.0125	130.597	100.438	75.1368	33.6168	-16.5374	-16.5374	74.2035	20.8324	94.7109	64.975
1218.45	41.5934	27.6347	95.1631	47.6847	66.8827	5.45642	218.015	102.042	238.234	58.2289	80.4772	104.712	99.2693	48.8506	37.8307	-2.67824	-2.67824	85.0509	89.6251	62.3038	49.9993
1217.29	35.4194	-36.963	91.5208	2.13263	-10.4528	-20.9717	207.7	78.4274	228.109	63.7075	74.7674	107.488	129.804	57.2007	44.1316	0	0	33.4508	101.079	56.5475	55.1491
1216.14	69.8148	-0.05774	100.892	8.6457	-27.412	5.36289	171.059	62.9126	209.491	51.4864	86.1223	111.865	63.57	56.3949	52.5291	3.09109	3.09109	77.1616	91.5919	128.157	65.4661
1214.99	5.23271	23.7443	69.787	-1.10714	-3.82058	36.5756	173.592	60.4654	193.268	38.2478	123.364	99.9521	125.792	57.4943	55.6056	-14.1284	-14.1284	94.5761	52.364	109.716	110.184
1213.84	26.6445	0.08799	70.4881	-0.01619	38.6089	40.4311	160.141	73.1642	136.565	34.909	98.2004	113.359	56.2488	58.1727	43.8371	1.14984	1.14984	61.0701	60.5156	110.295	144.228
1212.68	72.3749	32.061	87.0854	-10.8481	62.1816	6.21204	173.05	77.7948	145.456	44.782	43.9411	105.81	51.7575	68.0281	27.5811	-23.1686	-23.1686	73.5557	31.2216	60.1769	158.242
1211.53	25.6658	-9.5782	69.0021	-37.9286	0	8.12088	196.262	90.7064	178.162	39.7553	22.6032	114.127	97.2764	86.6453	25.8964	-25.1489	-25.1489	49.9172	56.9939	62.0339	153.792
1210.38	45.4411	-15.2248	78.3718	0	30.151	4.17757	181.905	90.022	168.341	51.0616	23.9682	117.238	77.7795	92.9131	27.8457	-10.8888	-10.8888	75.5324	5.69368	77.8321	143.628
1209.22	55.4847	20.004	67.5197	-7.64568	37.6869	2.18805	187.358	104.652	167.066	29.9727	-11.8892	126.916	69.9546	92.5554	36.2087	-24.0291	-24.0291	32.2117	54.581	102.493	131.666
1208.07	57.4211	-44.4915	95.6576	-73.7657	8.49513	33.371	186.295	99.3045	168.323	38.887	2.00652	128.218	-6.17515	110.603	40.5844	-0.6435	-0.6435	54.5398	0	27.085	122.637
1206.91	46.3957	-22.3441	19.8431	-7.76663	-37.6319	44.0588	203.869	101.058	145.155	41.9353	4.74577	126.689	57.6458	96.059	39.8118	-43.1937	-43.1937	52.2525	14.6234	92.2708	98.2982
1205.76	49.9541	24.3054	30.6594	-34.8884	-38.5571	7.93142	217.455	83.2581	134.345	61.8218	3.68436	134.96	76.4765	78.243	43.0404	-20.8265	-20.8265	27.0037	42.443	-16.0248	78.9314
1204.6	64.8488	-22.1813	90.5388	-53.334	-18.772	59.5783	234.882	70.7953	109.555	61.9083	15.0863	132.843	55.3388	44.7116	59.5066	-19.757	-19.757	41.124	26.2565	76.9992	81.0843
1203.45	84.5961	-1.68286	94.1244	1.80668	4.76639	20.5383	217.496	86.8992	109.669	56.55	64.7106	122.648	34.208	29.8779	72.5928	-22.7443	-22.7443	19.1666	27.6706	54.812	92.1095
1202.29	93.0029	9.01147	97.7102	-50.1761	33.9456	-6.78621	239.502	103.947	114.986	50.6871	40.9031	154.293	86.3244	7.70686	78.3225	3.66377	3.66377	36.5623	22.4882	69.1441	92.1145
1201.14	145.113	11.5365	63.794	47.1333	85.6856	30.2151	249.263	115.131	155.293	53.5595	63.405	152.771	21.9272	-9.131	73.9269	-7.43252	-7.43252	62.145	49.187	13.4981	100.85
1199.98	147.032	1.00283	74.5948	26.528	50.8898	51.6176	267.654	108.274	181.987	57.7901	94.0173	164.532	77.3546	-3.2997	87.3728	-12.4435	-12.4435	63.1404	35.2099	55.2761	106.482
1198.82	169.986	5.16298	117.111	1.60657	31.1519	65.2195	274.785	104.85	217.726	46.5941	95.4144	168.888	109.472	15.2567	81.5245	-21.5039	-21.5039	52.6673	16.8428	31.2746	129.627
1197.67	186.461	20.745	99.0682	38.3191	42.4455	57.3896	286.986	137.552	240.009	34.6187	78.4584	188.51	28.4755	36.5794	76.0803	-4.2289	-4.2289	47.1127	7.27207	83.1503	132.814
1196.51	223.958	41.2163	102.651	-11.4536	40.5766	88.5153	313.169	134.628	258.695	34.8729	76.0456	198.35	93.8489	64.3765	61.9395	17.0903	17.0903	82.5042	98.7661	52.8324	141.577
1195.36	238.8	50.2615	158.107	86.8505	44.3478	58.2924	319.729	139.356	258.612	29.7964	58.8593	215.011	115.97	56.1555	68.0143	9.04302	9.04302	31.0985	92.4789	122.382	138.078
1194.2	256.87	103.339	153.034	75.9881	106.372	55.3376	352.386	172.732	276.473	63.3113	58.5204	222.631	149.719	52.4725	69.924	8.08449	8.08449	35.375	44.4672	93.3325	127.604
1193.04	318.582	105.849	175.333	105.108	150.529	129.275	371.766	199.29	294.359	68.3862	47.3482	228.141	136.92	52.4308	75.8061	26.3566	26.3566	74.0257	49.1725	97.1489	92.1849
1191.88	318.852	129.552	191.861	123.412	193.727	127.283	375.638	249.249	312.305	90.0591	66.288	247.607	105.847	57.2228	94.6357	51.7031	51.7031	114.297	110.954	122.437	115.198
1190.73	312.657	146.727	227.103	87.7205	162.729	166.157	418.594	278.914	330.301	112.207	85.5914	269.893	179.454	62.4765	114.148	66.9262	66.9262	128.376	95.8909	123.722	127.329
1189.57	278.998	185.083	230.661	168.652	169.298	180.699	413.985	307.829	331.334	140.236	149.187	281.184	201.54	93.6608	148.042	85.1784	85.1784	130.999	136.794	159.102	144.666
1188.41	322.891	200.612	268.762	202.056	265.041	169.952	445.289	319.528	383.104	172.769	161.461	301.426	246.869	132.364	181.1	106.458	106.458	184.324	135.994	146.492	150.11
1187.25	316.7	219.395	289.581	264.59	204.956	274.917	447.958	323.054	423.546	199.015	167.621	331.796	227.423	193.778	218.808	143.907	143.907	242.537	175.777	213.414	170.159
1186.09	313.741	282.149	296.003	247.249	217.146	275.824	414.691	346.044	455.63	229.748	177.46	381.828	290.993	214.281	253.565	156.07	156.07	184.643	233.092	194.489	202.889
1184.94	301.096	282.996	312.494	238.547	331.592	291.31	412.937	323.267	471.601	261.27	197.405	414.031	231.711	232.736	272.886	194.507	194.507	208.506	157.717	266.426	233.169
1183.78	249.715	277.33	380.756	254.659	316.553	287.355	391.497	342.463	459.775	278.291	210.297	450.09	316.83	254.239	300.674	207.668	207.668	271.585	224.881	221.005	289.155
1182.62	262.909	243.994	341.144	290.185	292.147	351.419	390.201	355.301	458.808	310.531	237.875	459.941	345.505	277.219	319.248	201.631	201.631	269.28	208.722	273.993	301.564
1181.46	292.236	288.794	361.931	326.772	278.06	317.342	385.025	344.028	459.612	324.504	220.645	471.37	339.331	288.679	315.224	223.877	223.877	355.198	223.252	294.168	331.202
1180.3	300.578	283.134	332.401	262.011	311.795	315.333	401.5	350.374	430.946	345.326	224.207	461.568	364.675	301.924	320.511	261.266	261.266	285.907	318.853	316.861	371.261
1179.14	241.171	280.729	328.751	294.286	279.907	329.834	407.832	344.171	428.419	352.623	239.611	445.125	338.602	293.861	313.878	261.282	261.282	324.431	309.259	273.991	381.672
1177.98	199.527	268.564	366.772	282.359	286.449	289.956	422.102	350.083	452.733	349.201	269.753	449.57	319.17	306.383	314.887	278.458	278.458	297.625	306.238	328.189	369.888
1176.82	244.968	217.372	338.695	277.987	272.381	291.839	450.822	340.255	479.742	345.013	265.769	441.844	306.377	303.104	301.603	267.369	267.369	303.482	265.99	305.496	336.088
1175.66	213.011	231.243	360.902	290.854	231.153	366.51	476.019	315.089	506.575	336.206	253.701	447.919	331.709	306.453	302.716	255.275	255.275	317.498	261.886	371.012	332.978
1174.5	264.88	261.369	276.83	263.871	324.814	269.408	464.915	316.191	522.218	320.274	243.005	446.668	262.581	269.052	300.975	271.439	271.439	318.456	266.541	296.674	326.541
1173.34	223.263	270.351	299.04	243.355	301.384	293.609	467.109	298.863	504.918	315.428	249.644	458.375	349.211	255.444	295.681	280.533	280.533	312.885	221.945	350.832	290.377
1172.18	233.22	211.073	296.838	268.068	242.388	305.192	466.91	315.314	470.264	296.563	240.237	458.89	280.104	247.385	305.659	250.29	250.29	304.055	185.026	310.525	307.058
1171.02	243.173	169.692	280.286	237.879	265.791	239.191	449.331	293.211	436.326	283.381	221.965	437.315	268.989	257.147	304.071	234.178	234.178	308.278	257.52	342.001	265.545
1169.85	259.566	216.054	262.304	287.347	246.136	299.266	461.887	305.686	405.267	292.509	213.504	425.805	229.73	271.555	294.613	249.327	249.327	284.778	188.89	318.078	245.979
1168.69	293.665	184.432	281.632	252.858	288.242	232.32	440.086	324.593	388.639	297.523	201.528	393.73	279.881	276.989	290.414	224.148	224.148	251.502	172.776	324.368	227.659
1167.53	301.992	237.271	312.431	225.92	319.111	281.713	430.325	332.16	395.432	304.195	217.235	380.824	263.807	264.212	283.484	222.161	222.161	276.925	211.337	338.209	239.153
1166.37	297.438	195.917	270.073	246.323	204.051	281.666	400.093	344.197	417.687	294.664	245.765	372.159	257.669	268.697	277.682	186.922	186.922	269.743	173.363	334.431	225.701
1165.21	345.997	206.527	310.9	250.588	213.416	246.74	373.755	336.297	418.213	287.199	240.7	366.054	225.06	284.115	277.445	239.347	239.347	238.122	222.84	321.851	259.684
1164.04	365.574	217.134	323.039	264.529	304.125	296.105	381.838	330.004	454.616	276.551	260.818	361.668	232.166	294.621	269.782	245.417	245.417	287.972	262.463	396.052	343.612
1162.88	402.84	234.229	363.843	246.221	306.929	262.163	377.44	354.174	477.97	290.277	292.688	362.184	272.349	290.262	289.309	234.368	234.368	244.959	270.389	388.497	372.216
1161.72	406.314	269.163	327.241	289.182	234.956	316.35	388.785	349.612	494.857	307.542	323.755	393.37	302.595	280.792	295.524	251.514	251.514	302.934	253.188	402.315	408.826
1160.55	464.466	278.132	349.402	288.074	303.188	301.781	420.702	356.808	483.29	322.667	336.34	441.156	299.764	272.84	314.368	270.669	270.669	326.695	225.072	393.507	468.248
1159.39	347.338	274.122	372.987	365.396	304.12	368.526	469.085	355.938	492.12	362.457	336.521	471.315	346.523	304.497	317.919	308.939	308.939	313.002	243.919	462.614	484.832
1158.23	378.15	323.626	408.023	329.9	331.213	381.053	528.844	388.925	522.803	402.887	365.519	518.323	370.129	323.299	330.777	317.008	317.008	323.731	269.311	441.234	480.653
1157.06	363.947	343.929	447.342	441.564	419.004	412.929	548.277	412.346	536.446	440.487	360.406	538.518	395.379	328.431	337.571	338.154	338.154	368.632	309.975	446.243	508.282
1155.9	293.505	382.056	445.124	350.228	448.868	407.063	597.393	436.872	542.542	469.237	371.615	569.029	443.748	337.124	354.935	372.37	372.37	389.11	289.51	466.323	509.699
1154.74	250.404	386.135	514.485	412.462	430.174	497.926	590.734	457.35	549.175	489.88	360.518	569.872	473.93	365.472	361.142	405.567	405.567	417.715	371.617	461.28	455.241
1153.57	215.351	445.304	506.531	434.955	432.956	495.916	587.783	452.657	549.289	500.413	338.586	571.235	406.664	416.93	361.931	411.602	411.602	446.309	355.512	353.289	473.751
1152.41	194.766	327.872	508.599	490.718	430.143	452.335	583.135	444.82	569.134	494.24	353.023	550.462	374.099	425.51	358.853	377.421	377.421	439.12	397.221	382.166	486.328
1151.24	185.43	359.495	462.02	432.711	366.676	431.969	550.739	443.771	546.48	502.838	376.517	513.748	402.627	420.248	354.915	418.642	418.642	404.293	347.312	360.828	447.998
1150.08	171.28	345.765	481.261	395.117	393.731	400.016	491.839	394.24	508.126	472.033	380.986	485.196	399.785	413.436	333.058	362.363	362.363	423.123	386.827	419.808	454.118
1148.91	161.951	275.371	430.414	384.35	351.749	381.601	440.842	357.883	454.771	447.278	364.306	452.096	324.333	376.521	314.794	374.432	374.432	383.437	377.272	348.29	449.698
1147.75	142.998	232.524	401.037	295.304	328.439	419.235	377.979	315.375	426.153	415.856	331.942	412.434	227.461	337.685	281.671	308.137	308.137	407.14	337.205	323.212	434.92
1146.58	141.701	197.786	334.5	319.952	283.694	282.012	358.954	286.974	403.377	358.1	310.529	379.938	267.544	308.174	254.34	261.957	261.957	282.994	287.345	258.012	433.817
1145.41	190.138	177.626	323.734	230.954	280.916	293.575	327.354	270.924	381.381	309.563	270.689	350.642	202.057	242.257	209.402	219.811	219.811	314.829	186.299	274.338	405.944
1144.25	174.398	168.798	245.804	208.446	265.092	283.892	328.281	268.003	384.847	281.472	240.732	320.219	167.925	188.393	187.424	191.738	191.738	252.46	201.844	266.84	355.673
1143.08	145.835	155.122	246.491	257.748	199.884	226.905	308.286	268.077	367.455	256.161	227.876	282.52	229.431	149.541	155.005	183.754	183.754	225.837	183.621	281.907	294.37
1141.92	186.227	146.302	215.748	195.602	175.697	202.76	289.017	259.861	381.104	223.253	209.467	296.489	157.394	142.723	131.959	154.695	154.695	173.249	149.073	209.247	270.953
1140.75	144.848	127.787	235.011	215.973	216.73	202.755	261.888	250.216	406.038	203.38	182.426	308.672	172.734	110.99	123.003	121.636	121.636	159.638	133.046	189.24	234.829
1139.58	135.54	127.06	219.991	218.124	214.902	209.502	216.446	238.393	400.702	187.953	183.756	328.298	127.1	95.8329	109.726	123.704	123.704	165.503	87.6354	225.61	201.033
1138.41	105.404	176.443	212.118	177.447	197.25	203.709	189.578	208.121	392.858	166.498	181.696	343.944	102.901	96.6844	102.128	119.755	119.755	160.012	61.8319	173.045	216.956
1137.25	110.527	161.165	215.668	175.33	169.364	273.154	196.276	192.591	376.134	161.382	186.475	367.078	63.8878	79.9688	111.712	81.7074	81.7074	83.1464	108.938	218.173	212.684
1136.08	104.435	132.967	213.508	205.329	175.93	247.102	199.338	177.228	373.455	143.039	176.27	367.584	67.7067	78.1039	101.618	115.873	115.873	136.061	94.0187	200.685	208.439
1134.91	98.3462	174.245	168.54	182.875	221.581	220.095	226.841	163.532	342.067	130.636	174.907	351.271	147.265	78.2966	91.8645	81.8518	81.8518	122.471	84.5436	164.429	208.405
1133.74	90.6583	133.135	199.205	109.07	185.335	238.408	223.698	157.34	346.842	130.501	173.739	343.423	103.327	42.1543	66.9885	93.9532	93.9532	131.585	54.4108	185.756	178.18
1132.57	60.5601	124.337	195.623	114.461	191.896	221.053	251.17	154.648	321.777	150.999	169.051	320.85	113.72	12.8285	65.1532	68.9693	68.9693	140.696	62.3427	208.327	172.545
1131.41	35.2752	94.5543	172.077	105.946	164.041	244.179	238.078	142.855	289.708	146.637	180.866	299.398	82.9703	-6.98982	33.9326	59.0252	59.0252	70.3909	-2.55941	103.283	153.032
1130.24	62.8117	100.298	158.523	134.873	128.762	187.333	245.71	133.638	279.071	136.697	156.957	294.685	27.5538	-3.02833	22.7203	48.0855	48.0855	113.54	35.8128	142.126	145.528
1129.07	11.9353	94.7406	122.162	127.429	121.386	167.11	199.801	142.691	270.258	135.104	129	264.79	85.6611	-9.323	26.1687	59.1841	59.1841	93.4891	44.8308	132.179	110.348
1127.9	18.6693	89.1873	112.899	199.105	84.2701	144.972	162.447	146.118	266.729	118.548	127.914	257.383	58.2248	-19.4151	21.6225	51.2536	51.2536	49.1517	44.0688	133.491	93.8212
1126.73	-4.98803	82.0232	106.49	85.8459	83.4167	138.251	160.098	132.36	243.577	100.544	117.234	240.431	32.4434	-8.44752	21.4624	40.3227	40.3227	123.051	4.20338	171.058	115.465
1125.56	-22.2404	52.2795	124.306	114.76	116.947	123.831	184.842	134.45	215.04	91.5399	115.663	231.201	46.1292	11.2812	25.6765	21.3878	21.3878	85.2024	38.202	106.121	102.152
1124.39	-17.1015	27.3855	83.7076	110.542	68.706	93.0538	176.03	132.815	216.55	87.3582	99.6974	196.477	58.1664	24.5524	13.2716	16.4727	16.4727	53.8434	24.4123	86.1954	100.301
1123.22	-8.76725	55.7116	104.37	90.3038	61.3559	105.596	158.235	111.904	192.665	78.987	95.8928	182.723	47.1911	15.6178	19.5097	30.573	30.573	103.424	61.6516	102.511	72.379
1122.05	7.55527	5.03292	62.3676	92.5031	44.7221	112.361	145.28	94.8016	196.907	79.3555	72.8956	173.064	28.0046	-2.86202	30.8149	26.6594	26.6594	60.7462	30.4965	73.8509	71.56
1120.88	-32.0566	12.3995	77.3321	82.9569	37.381	114.313	124.798	80.3008	184.333	90.4163	58.7381	176.503	17.0395	-20.532	32.7203	15.7455	15.7455	50.4438	1.52375	91.4124	79.2932
1119.71	-4.552	-10.8537	43.8932	111.856	38.4025	74.9113	113.485	59.9703	199.504	72.9063	59.2772	164.043	4.43738	-8.41131	19.9008	6.83832	6.83832	129.117	13.7928	88.9915	72.0977
1118.54	3.77413	-27.6545	51.7398	44.6709	-1.4204	120.146	92.0408	63.9029	217.989	70.0081	50.0215	147.712	1.69235	-0.55069	26.6628	8.93223	8.93223	42.7924	10.8694	70.3394	73.1932
1117.37	-48.59	-21.8941	70.9691	10.6025	53.4354	103.835	53.7376	69.6854	234.226	64.4978	71.9049	131.235	23.5783	13.2391	28.2163	21.0253	21.0253	59.9917	-32.1816	87.896	55.1019
1116.19	-38.6616	-12.9143	11.9422	85.3857	32.1873	112.524	49.8788	80.6993	240.802	41.6827	92.4758	128.836	32.3234	15.897	24.6385	21.1195	21.1195	7.66597	-23.1659	46.7908	76.0185
1115.02	0	4.11414	49.6641	97.1989	46.1996	-7.57884	48.8003	61.7646	222.999	27.7715	94.2533	143.959	1.67469	35.0998	7.55001	-10.766	-10.766	36.1811	-46.6788	68.0896	89.7341
1113.85	-61.5016	-35.214	46.1289	49.2775	3.6295	37.6446	58.5781	70.1896	207.448	20.0161	90.8649	144.259	7.13924	39.3968	-12.7953	-4.66988	-4.66988	53.3732	-7.31193	75.658	79.1298
1112.68	-39.994	-6.9191	14.1571	33.368	14.8616	32.8929	49.3883	59.0541	217.752	18.5541	88.0973	133.216	-2.16418	26.266	-20.18	-1.57267	-1.57267	4.31102	-22.1485	35.8272	89.1854
1111.51	-7.32536	2.05257	2.10063	44.1219	21.4546	40.6311	81.2725	38.7217	196.867	22.6648	84.0982	136.232	22.9837	8.78641	-13.408	-14.4572	-14.4572	52.198	-23.9765	68.341	81.6541
1110.33	-44.8598	-50.1231	0	18.6342	22.4877	43.5688	75.6983	45.6703	160.646	26.1008	52.2689	120.62	-27.3187	-32.7517	-3.49908	-18.3468	-18.3468	75.8413	-45.3032	44.7388	75.7357
1109.16	-20.1767	-39.5371	-9.6998	-18.5731	-42.2862	33.0596	70.6472	72.9088	146.914	36.114	32.7278	99.4303	-30.0508	-28.5227	-15.3158	-25.2319	-25.2319	17.1143	-13.5479	63.5274	89.6842
1107.99	-48.1247	0	9.02159	-0.34621	7.87178	13.9185	81.0805	71.8791	134.026	17.1472	24.1589	71.5308	-39.3381	-17.9328	-8.00145	-1.16623	-1.16623	47.2145	29.0264	103.5	90.0811
1106.81	-76.0633	-62.5701	0.74455	27.458	-59.6529	28.3765	36.7489	77.2435	104.067	23.1875	12.951	57.5414	28.4161	-13.5224	7.69209	-9.04914	-9.04914	64.3875	-44.2712	-2.34029	80.2543
1105.64	-59.3577	-41.5055	-3.26778	-29.9594	-38.2239	4.44675	39.9661	64.9526	68.2909	12.8623	8.06397	70.5173	-13.6547	-6.68203	16.4804	-2.95642	-2.95642	10.5409	-35.266	27.6637	120.572
1104.47	-69.7504	-9.19565	-12.9587	-15.9967	13.7597	3.55441	26.0396	67.2104	24.4664	-3.46548	3.69967	80.1036	0	-28.2752	22.6783	-13.8263	-13.8263	11.5802	-11.1112	26.5156	149.472
1103.29	-64.2044	-47.6187	8.58922	-18.0105	30.5388	50.6287	3.17271	51.3787	-1.71018	-6.40131	-4.44417	118.264	12.0829	-25.5562	14.1489	-21.6992	-21.6992	31.9802	-42.1549	51.5223	148.709
1102.12	-72.9985	-23.3547	-46.5243	14.0457	-32.3036	40.1382	-4.30086	58.2688	-0.97032	-9.72206	-13.4518	130.458	1.2309	-37.882	9.16643	-3.63848	-3.63848	31.4028	-43.9742	36.6743	141.137
1100.94	-59.4905	-52.1199	-0.85033	-31.606	2.06964	-17.3321	-3.60342	46.0418	22.1803	4.72094	-8.61709	131.134	-14.5281	-39.8859	21.1293	-23.473	-23.473	3.41082	-62.0177	5.6506	133.92
1099.77	-26.8752	-80.8748	-14.7909	33.4346	19.769	0	32.2689	33.0156	40.1527	28.603	-1.01601	135.305	13.9242	-41.1065	14.5698	-16.3842	-16.3842	15.7396	-34.6309	4.50966	113.289
1098.6	-34.0769	-64.6483	-23.0513	26.098	-22.678	20.2708	30.8725	33.1884	52.9742	38.4802	-15.2827	121.557	58.7357	-55.1771	18.8426	-11.2912	-11.2912	44.1858	-13.7423	0.88076	72.1226
1097.42	-49.2367	-75.7258	-21.3788	40.0481	-53.0787	-14.0926	54.4105	28.7249	59.7692	51.6521	-9.80122	95.5801	0.42224	-22.8676	15.0135	-15.1668	-15.1668	4.92539	-0.42816	75.3077	60.2063
1096.24	-42.1073	-70.7443	-31.0523	14.6401	-26.1235	-16.821	40.5664	11.9327	64.2701	43.4859	3.10386	56.1756	-5.50571	-5.16817	17.8942	6.86524	6.86524	72.0432	-3.33279	35.1234	49.5574
1095.07	-27.0222	-80.2112	17.4122	33.9069	-0.1026	36.9766	34.2683	4.48091	58.5137	38.7976	-8.1288	28.7567	-29.4277	8.57322	19.3541	0	0	45.6831	-49.4651	80.7751	28.2914
1093.89	10.3309	-67.2065	-24.871	0	18.5093	-0.24503	31.8967	-16.8515	67.0258	30.564	-25.7336	32.435	-5.9053	-3.16402	19.953	-15.8494	-15.8494	0	-32.9108	12.0024	72.8732
1092.72	20.6288	-34.9515	6.56581	37.6407	-51.6213	6.60355	21.8329	-7.96115	65.694	13.2503	-24.2857	10.1972	4.52643	-28.524	2.05389	1.17135	1.17135	11.7364	-40.1284	-19.4432	76.854
1091.54	-4.0669	-42.8148	-3.10464	54.0143	-17.286	30.6874	16.694	27.093	65.8139	-1.21052	-10.5721	11.6259	-1.3956	-8.8593	-11.9336	-4.71131	-4.71131	36.3523	-54.9032	27.4392	76.3194
1090.37	-30.3432	-58.6954	-31.1908	16.1851	-69.8253	-5.55123	15.8006	30.3601	57.5256	-1.44357	-4.73922	12.1329	12.3014	-10.1959	-11.6694	4.33826	4.33826	27.1471	-24.3169	53.1741	86.6676
1089.19	21.2938	-52.1186	-11.1029	9.18103	-41.045	20.4387	3.64671	37.0546	40.6008	9.00604	2.75752	15.1603	-5.06208	-9.62175	-5.69444	-24.4347	-24.4347	61.4087	-22.8941	35.4082	103.25
1088.01	90.3967	-37.5269	6.14564	51.0461	0.66044	30.1532	33.4426	31.2677	25.924	18.2807	-2.27835	22.4901	-17.515	-9.25225	-2.48561	-0.45605	-0.45605	44.1565	-2.03969	49.9532	111.1
1086.84	148.351	-0.49822	12.0588	29.171	-1.981	5.41784	46.6676	25.0635	36.4764	36.6067	6.08876	53.2453	37.0254	-27.8158	16.4948	-18.2728	-18.2728	49.4379	-68.617	47.1011	106.762
1085.66	174.502	9.27004	17.9705	38.101	0	43.8303	66.9611	31.4077	16.2906	53.7063	24.5114	88.1216	31.1041	-22.5475	21.225	10.6699	10.6699	43.4566	-27.2588	45.4942	92.3453
1084.48	254.66	-16.2194	53.6056	44.905	65.1561	53.5361	77.0115	32.892	50.343	75.28	28.9837	87.8656	-9.11353	-9.6663	21.5516	19.7121	19.7121	55.1716	5.45305	43.8882	104.507
1083.3	342.728	-43.3014	94.8884	121.761	70.2943	79.4949	103.8	45.8209	96.9662	92.3089	19.2765	114.136	-28.0871	8.41943	28.5685	23.7798	23.7798	54.0165	-65.4016	23.6616	117.714
1082.12	465.703	8.11794	59.7472	113.691	50.5151	128.39	134.601	61.1486	169.366	114.363	38.038	166.763	-4.60422	9.4588	42.3056	37.7876	37.7876	65.7254	8.28778	86.6038	151.094
1080.95	510.83	77.135	105.258	140.638	55.6555	129.473	185.536	122.947	262.52	112.945	74.4695	216.425	59.6791	17.9254	34.8999	44.833	44.833	87.0759	0	72.5823	171.341
1079.77	487.681	134.918	135.193	173.944	146.586	185.033	236.924	176.911	364.919	121.681	106.996	284.371	57.0257	67.9148	40.5256	39.953	39.953	100.383	-27.321	101.994	182.063
1078.59	477.237	160.66	201.885	300.57	170.153	247.259	279.526	216.329	426.004	130.77	127.446	365.483	83.7437	77.0345	57.6195	90.713	90.713	115.291	3.57097	177.292	220.603
1077.41	419.192	240.814	264.31	339.137	253.652	351.499	384.654	306.467	486.892	136.754	155.689	478.376	141.45	92.9526	79.1074	86.8204	86.8204	147.869	71.0963	144.66	255.645
1076.23	375.448	328.94	370.535	466.745	344.493	458.564	481.765	379.2	543.431	154.231	186.442	583.157	137.151	115.571	114.847	89.8801	89.8801	159.55	91.1847	161.641	266.623
1075.05	296.824	452.234	461.173	477.706	415.946	535.031	558.441	451.806	604.857	185.459	219.111	686.545	220.92	142.365	152.983	124.717	124.717	161.591	77.8743	163.739	276.135
1073.87	237.26	497.094	500.905	508.801	488.294	604.787	582.774	496.774	628.141	217.428	224.306	743.799	224.762	176.523	168.732	166.491	166.491	152.391	101.19	216.66	287.829
1072.69	207.849	473.161	539.209	547.301	533.895	696.473	586.109	519.19	629.165	264.662	241.471	750.709	305.222	209.696	197.83	171.523	171.523	202.598	102.96	218.748	316.642
1071.51	138.814	462.03	488.507	535.994	468.008	594.373	559.676	516.302	623.303	307.876	257.265	734.755	369.353	240.869	256.829	195.409	195.409	186.973	167.177	244.379	334.99
1070.33	136.379	402.938	457.596	508.804	501.622	524.756	529.335	489.609	610.226	346.008	274.963	683.519	404.128	243.228	290.761	231.194	231.194	275.673	185.082	183.279	357.975
1069.15	105.419	358.256	440.817	498.569	398.01	482.835	455.69	460.411	571.423	349.836	281.081	607.453	368.831	251.755	316.643	270.934	270.934	290.528	220.201	215.101	409.681
1067.97	112.498	278.429	380.281	395.164	386.514	394.191	383.152	401.793	523.793	350.501	268.229	521.645	369.386	261.528	329.492	265.034	265.034	311.796	231.638	250.627	418.447
1066.79	83.139	217.808	339.527	268.506	367.655	300.81	314.475	350.95	427.431	332.959	259.91	448.909	334.109	236.429	320.062	258.144	258.144	289.747	223.703	220.516	417.632
1065.61	102.891	187.565	247.985	302.781	246.644	288.518	311.963	317.554	343.718	305.213	257.288	387.699	263.023	217.684	300.966	245.31	245.31	278.933	231.909	234.985	388.211
1064.43	68.7966	117.4	170.588	251.327	220.462	277.184	264.457	269.016	262.813	267.249	254.427	325.305	258.714	197.325	267.008	249.333	249.333	232.85	168.059	227.169	326.412
1063.25	56.8793	114.337	189.148	231.634	198.889	201.039	262.591	236.373	228.758	230.065	218.035	270.853	189.297	178.839	215.173	205.781	205.781	210.83	140.791	167.383	258.248
1062.07	33.8874	82.5338	118.843	109.339	177.325	167.808	235.708	198.914	201.613	190.488	180.213	240.312	134.554	146.307	147.182	182.065	182.065	134.324	108.159	205.362	226.643
1060.88	31.4793	89.0571	143.047	139.39	120.822	121.25	184.699	190.216	170.356	169.547	160.138	221.649	125.391	109.854	101.336	138.543	138.543	144.381	93.8126	170.344	192.411
1059.7	22.7428	58.8671	137.633	130.305	61.5825	188.075	174.941	161.117	183.089	143.688	131.23	207.859	132.5	81.9701	79.5746	117.821	117.821	119.186	81.6213	162.547	161.528
1058.52	50.3978	78.1592	119.535	110.652	121.879	138.675	164.229	137.71	195.582	134.25	109.376	193.237	107.077	54.2253	42.7943	103.049	103.049	135.65	55.4677	154.755	175.31
1057.34	22.6803	43.1967	49.2971	148.09	109.543	159.765	154.3	140.74	180.228	120.369	108.139	189.033	102.805	45.5675	41.111	94.2264	94.2264	97.655	42.2187	132.131	205.089
1056.16	1.29951	30.5801	107.315	147.465	129.374	94.2035	146.148	125.586	181.774	125.937	104.701	188.606	20.4906	23.7022	40.7678	72.5356	72.5356	133.332	60.1186	144.125	192.397
1054.97	27.364	6.80427	89.2335	81.333	49.0502	96.2562	137.352	121.07	155.927	129.423	99.1005	190.03	56.8772	32.876	47.2377	62.7332	62.7332	20.1073	24.325	116.57	191.681
1053.79	47.0939	3.7676	69.7505	57.4837	42.2485	92.5982	134.52	121.899	125.833	128.767	118.233	164.46	23.3628	30.0621	51.6533	74.7069	74.7069	94.2028	78.7293	134.742	165.494
1052.61	60.4958	-5.64515	85.4829	94.9059	-2.20704	82.2809	95.3332	94.8386	129.042	112.307	122.98	163.008	92.2352	24.275	57.1975	68.8664	68.8664	78.6504	21.4788	162.791	110.035
1051.42	67.5717	21.6082	78.6806	75.2886	63.5499	74.8222	101.131	82.959	137.795	112.046	97.3537	168.512	34.3572	21.7473	51.6859	65.0071	65.0071	80.7046	23.2771	132.779	105.014
1050.24	112.564	-6.92891	67.6576	94.7452	75.1133	72.1228	70.2595	66.5278	123.463	102.783	84.0126	177.288	52.8466	22.2519	54.5793	74.9967	74.9967	52.3629	29.3674	125.006	110.036
1049.05	198.612	-29.0814	84.7893	115.251	60.9707	121.731	32.482	62.5653	136.475	95.2074	90.6014	188.805	37.224	23.6668	57.5954	78.0607	78.0607	52.8222	31.165	149.338	104.588
1047.87	215.135	-3.4316	86.4353	99.8672	66.1101	114.273	25.1725	63.5421	147.353	85.8274	85.2799	192.189	49.2126	10.6813	55.0968	58.3858	58.3858	58.08	29.7481	126.755	110.771
1046.69	291.659	15.8369	81.0454	102.426	59.3163	116.322	32.2194	64.1092	171.22	92.8065	107.588	192.335	62.8192	9.17264	48.8855	70.3493	70.3493	68.1316	50.8496	146.141	119.774
1045.5	309.737	28.7285	86.9119	150.355	69.0424	129.779	104.274	86.1925	202.523	93.1272	111.942	213.449	95.8997	13.752	48.6002	90.2172	90.2172	114.947	19.4094	165.523	133.434
1044.31	321.495	35.2464	125.125	166.62	142.056	137.53	145.282	112.13	242.996	110.159	131.182	245.593	55.9406	14.7519	53.0519	113.043	113.043	91.4222	73.7412	191.065	167.161
1043.13	323.781	79.9674	145.042	192.369	204.034	162.378	188.582	155.072	293.149	123.259	155.486	282.305	111.724	52.6749	65.9643	94.3635	94.3635	69.5034	79.8193	212.897	209.605
1041.95	288.197	166.054	215.566	252.908	281.58	219.517	243.26	209.492	323.367	162.932	212.857	312.552	120.444	70.8822	70.237	133.972	133.972	124.281	84.8277	258.154	250.224
1040.76	183.211	182.09	266.384	315.534	311.427	294.681	299.235	261.5	376.392	214.378	245.06	388.574	198.904	108.008	104.624	137.026	137.026	175.843	96.263	273.801	281.835
1039.57	188.678	258.579	336.859	313.843	328.435	364.122	380.084	297.108	410.057	283.372	272.913	429.88	205.984	167.033	140.843	183.526	183.526	177.879	110.912	235.202	368.502
1038.39	172.064	276.183	327.215	396.457	356.43	356.632	432.522	321.333	454.075	350.479	305.765	472.522	274.67	215.73	199.227	265.547	265.547	216.638	223.011	323.57	425.423
1037.2	142.844	287.418	347.076	428.466	385.332	410.846	440.737	332.124	502.849	389.112	341.59	481.652	314.152	267.266	235.458	329.77	329.77	349.572	291.167	395.885	467.243
1036.01	94.7195	289.109	327.602	408.848	383.081	416.64	393.753	319.075	492.94	426.592	338.623	435.44	347.139	281.466	264.764	352.525	352.525	383.496	302.561	481.727	482.327
1034.83	79.7103	252.644	316.561	310.244	283.75	386.375	369.296	282.226	496.117	425.271	327.947	409.393	261.825	292.926	265.515	367.378	367.378	379.109	251.87	424.641	465.299
1033.64	55.2523	146.255	246.554	281.176	284.264	319.121	355.838	242.113	479.523	390.934	287.451	388.146	259.166	264.195	230.66	347.698	347.698	314.092	231.159	432.852	444.428
1032.45	49.7112	151.15	259.398	242.647	249.991	297.424	272.073	209.053	439.029	355.179	272.854	364.558	146.366	224.309	194.461	303.371	303.371	285.791	221.161	377.029	410.567
1031.27	41.0222	133.799	176.796	196.765	184.611	264.356	209.943	166.097	404.143	303.847	255.121	327.286	124.299	175.535	130.896	245.256	245.256	227.197	148.051	420.952	352.606
1030.08	-21.2116	103.745	139.131	141.429	144.881	226.559	174.776	152.662	325.684	260.315	260.513	292.3	150.814	125.361	74.0668	216.74	216.74	205.302	164.812	372.538	300.501
1028.89	18.9296	54.6441	153.391	134.521	103.339	170.768	144.191	141.437	267.918	222.133	262.524	290.486	99.6165	98.6903	39.2376	190.209	190.209	173.851	112.063	283.532	264.142
1027.7	-8.63947	38.9093	111.537	105.52	112.127	169.969	126.729	106.792	231.993	195.016	256.38	263.311	64.6228	89.7158	14.6172	132.149	132.149	142.411	152.347	248.699	239.726
1026.51	3.15248	13.6542	83.7227	148.056	81.5808	117.051	96.7563	104.068	223.607	171.737	236.58	250.585	49.0613	67.9011	10.3936	144.072	144.072	90.2641	120.998	245.865	233.32
1025.32	22.8103	7.458	58.7243	111.706	95.8598	75.5254	68.5405	89.0998	173.136	141.816	218.253	208.224	54.5402	79.8402	-0.72401	108.704	108.704	105.062	61.8762	148.324	210.696
1024.13	-36.2114	-1.91	64.5779	87.9884	49.7897	95.5872	55.3002	81.3292	116.974	130.04	188.59	157.478	26.0473	60.4857	8.08647	87.14	87.14	110.295	78.6448	152.892	192.534
1022.95	-7.11423	-65.2258	57.8139	60.0718	30.2445	80.5981	37.2428	82.8719	94.7247	104.294	156.352	141.34	34.7623	40.6036	5.71237	79.3695	79.3695	58.185	46.2604	100.898	160.313
1021.76	-14.2042	-25.3951	18.8208	47.9351	11.6244	59.9359	33.0334	91.9195	71.8148	84.2303	114.627	126.538	-9.88554	11.0818	-3.74969	50.9279	50.9279	58.6484	8.55176	79.6578	121.232
1020.57	-18.1446	-53.7856	33.0859	17.9394	38.7012	24.1346	3.44158	91.3703	80.9094	68.0566	93.6285	104.611	2.06827	-7.782	4.23276	59.9049	59.9049	46.374	46.6818	69.4879	79.6423
1019.38	-18.9389	-42.5181	48.7465	77.261	34.7053	71.6422	21.5853	92.7558	82.9452	56.4202	52.9234	69.279	-16.6937	-18.5541	-3.56425	46.2418	46.2418	53.2074	45.2918	69.153	74.0943
1018.19	-11.8729	-23.3264	-19.6346	-30.4581	-3.0825	28.2844	36.0725	81.9391	88.5806	39.874	41.2785	55.547	-25.7506	-28.2665	-4.0599	26.6822	26.6822	40.9401	-14.8081	9.84737	90.7823
1017	-22.0971	-83.4068	3.03196	49.8567	-20.7666	106.998	32.6637	56.4464	101.44	33.78	32.84	59.7911	-23.4945	-33.0922	-1.19908	39.5953	39.5953	46.1809	39.3169	57.4309	115.07
1015.81	-11.89	-54.7045	13.0899	17.7887	7.21426	26.7571	10.0782	33.9386	108.905	34.7169	25.6718	41.4129	27.2263	-30.0807	0.04007	47.5876	47.5876	33.92	5.92061	33.7667	117.622
1014.62	-14.2546	-62.4614	-18.8507	70.7688	5.05558	37.3431	-22.5872	25.2408	129.47	34.1813	32.322	30.8687	11.7051	-24.0147	-10.6072	26.0711	26.0711	31.2071	-1.85935	-5.8528	134.391
1013.43	-10.3337	-67.0459	-18.589	-1.17692	-17.179	11.9937	-8.58537	21.3716	105.402	44.2537	38.4059	39.105	-21.5721	-16.0406	-24.5863	7.51509	7.51509	30.0867	-7.49886	-31.9507	125.42
1012.23	-3.27459	-68.4606	-32.3201	-22.7205	-6.55186	20.6908	-2.95596	23.4247	93.7113	47.9402	25.065	28.9038	30.7348	-39.934	-35.7449	19.4426	19.4426	17.8364	-0.33723	-22.4426	124.482
1011.04	-13.4878	-61.9556	-30.6567	41.784	-19.6507	38.8377	-9.76447	25.8374	62.2059	45.3906	24.4492	33.7791	0.69559	-46.4463	-48.8368	4.82733	4.82733	23.0785	21.7508	3.0159	86.6072
1009.85	-12.7081	-72.8715	-66.76	1.35831	-30.9194	14.4488	-20.888	25.1118	49.2356	38.3803	12.3012	27.9768	1.33291	-47.827	-53.2264	-17.6437	-17.6437	-17.7762	47.0295	-15.7059	69.5251
1008.66	-11.9298	-63.2017	-16.1437	-33.8069	-10.2614	17.4722	-11.103	6.61996	49.9427	21.2285	9.96399	25.788	-17.3934	-38.6524	-52.2539	12.9513	12.9513	14.4871	45.6515	-1.29832	46.8612
1007.47	-23.704	-66.1986	-42.4483	-18.6223	-11.4959	26.1633	8.91862	8.35927	29.0111	7.52848	-2.04165	15.7234	-7.07244	-33.0905	-47.5617	-2.6355	-2.6355	2.24977	1.6461	-29.8236	59.3559
1006.28	11.5962	-62.8635	-33.7936	12.2871	-57.3997	10.2953	41.7102	20.4417	27.7236	7.93784	6.27202	20.7105	-19.3361	-48.0075	-48.3355	13.2154	13.2154	-2.03888	-15.7006	-53.4306	75.7579
1005.08	-17.4324	-56.3655	-41.9148	7.54111	14.2991	28.4292	59.5299	20.4429	42.1898	16.6147	2.33924	25.7116	-20.3073	-53.3594	-43.7634	2.54523	2.54523	-3.15014	26.6138	-52.5095	62.2045
1003.89	-38.608	-67.2712	-12.3019	4.89717	-30.6798	25.7865	44.8013	24.5146	64.8324	17.3149	-3.03518	9.20699	-8.37715	-43.057	-48.4255	28.2078	28.2078	-12.1997	50.8093	-77.3284	76.7137
1002.7	-34.685	-67.1011	-55.3522	-10.3199	1.80995	90.1708	24.4977	23.927	89.7759	21.9293	5.94008	23.3546	24.5059	-32.412	-60.2723	16.5601	16.5601	-13.3073	16.4267	-54.3402	61.6506
1001.51	-11.9517	-66.9313	-31.3359	-47.5345	31.5518	18.6155	38.5317	34.2126	95.2003	31.1448	9.45794	41.6123	21.9159	-36.5551	-58.1144	-1.95465	-1.95465	3.04589	31.0308	-61.9957	39.945
1000.31	-26.8442	-79.4097	-60.3998	-6.17136	-8.84865	-12.3326	36.9742	23.5344	103.43	43.1532	-27.7421	42.3327	25.7745	-34.5584	-52.9611	-1.8166	-1.8166	-1.23791	-6.52708	-68.421	28.9787
999.117	-15.0891	-44.4595	-39.1831	2.71474	-15.5356	-31.0008	47.6094	11.4037	98.5576	49.1177	-18.5425	53.5801	18.3549	-37.37	-46.9322	15.0016	15.0016	-15.0396	-6.81618	-19.7223	16.5584
997.924	9.19666	-74.3226	-26.3514	-20.8644	-66.8364	-13.8181	46.8116	3.72658	99.1072	43.8705	-10.4255	53.6017	14.1588	-34.1813	-33.046	1.40521	1.40521	7.65198	16.3022	-34.7249	34.7681
996.73	-26.0556	-96.2734	-30.2745	-30.8246	-58.0362	26.9366	71.5035	3.61651	86.0315	35.3512	-13.304	50.6774	-9.36229	-24.3221	-25.3112	14.2926	14.2926	9.71497	-16.9738	-54.6192	39.9508
995.535	-4.90886	-92.9373	-35.5909	-17.7505	-9.18914	-25.6732	79.2037	3.08477	68.5859	24.1709	2.9267	33.3071	-23.2113	-22.5922	-9.14923	1.6848	1.6848	-0.90863	-7.6855	-69.6069	50.0065
994.342	13.0981	-70.6478	-52.0682	-5.73039	-13.1416	30.0231	92.6409	16.475	86.0593	18.4215	10.1289	32.2593	27.3421	-32.7568	-7.98582	13.5878	13.5878	26.5245	-11.1652	-56.4398	82.7646
993.146	21.706	-86.2691	-9.94722	-26.1456	19.303	-18.2095	83.8123	10.4672	106.274	6.0238	-1.05145	26.7843	-4.21429	-13.2331	-10.1393	14.7074	14.7074	14.3169	13.0058	-38.3806	103.721
991.951	5.26376	-75.0417	-40.3699	-6.80158	-28.3112	28.7598	64.9505	24.4616	138.063	-10.2221	-13.9848	33.2427	-18.0556	-25.2258	-15.864	10.9273	10.9273	-8.9806	12.1214	-76.6079	112.1
990.756	9.17532	-51.1891	-26.157	3.12285	-27.7057	0.33328	44.7958	18.0491	165.785	-21.5939	-11.1189	35.4267	-43.1547	-13.8736	-27.7934	10.7642	10.7642	-29.0997	5.52412	-12.0677	100.717
989.561	-7.25768	-87.3237	-56.5648	4.67862	-14.3699	21.8464	45.5042	17.6855	184.199	-20.9172	-9.18841	23.3605	12.1925	-9.37125	-24.4921	0.85568	0.85568	15.7475	-5.3214	-89.4211	80.427
988.365	4.47767	-66.6339	-21.4445	-6.31126	11.689	21.6886	18.857	-0.87267	200.146	-9.4393	-20.4814	14.7819	3.18196	6.31378	-28.7711	20.332	20.332	20.9766	6.14911	-78.7047	63.5468
987.17	-5.68951	-49.1074	-44.8729	9.88074	-28.6139	14.9395	40.3912	-5.86761	198.564	-7.39296	14.0434	33.6276	18.2968	1.23743	-27.5321	30.009	30.009	-30.8113	3.80571	-52.0989	62.0335
985.973	-1.77764	-41.0519	-55.7509	-33.4989	1.98572	-16.2845	32.2766	-10.8713	202.072	-2.56299	36.2439	45.1641	-1.96433	12.4164	-23.3503	-9.26758	-9.26758	12.4288	4.64916	-62.1704	52.1595
984.777	22.4608	-58.2347	-22.0437	21.3537	-7.40669	16.5126	49.2299	-9.59363	186.499	-0.77026	37.4468	44.3786	42.0814	33.5919	-25.9915	-10.3556	-10.3556	-23.5058	-17.8687	-79.572	48.4323
983.58	10.7337	-54.9111	-30.1357	-4.25089	-4.98239	11.6532	79.1934	-29.9769	160.741	-13.9537	56.6374	45.6463	13.7879	54.4763	-28.0208	19.8726	19.8726	-7.19165	7.39674	-59.0875	35.8135
982.385	17.767	-72.0845	-11.7651	-18.3591	6.52088	38.7873	102.563	-5.79649	151.079	-19.2748	54.2783	42.2277	-20.9234	66.2595	-34.0453	15.844	15.844	-3.54481	-33.1581	-49.6069	71.4464
981.188	10.666	-60.878	-44.9186	-1.12957	-20.1156	24.5181	117.067	-5.0747	130.54	-12.4958	41.0886	18.9781	15.0698	81.8941	-34.6472	20.6212	20.6212	14.3419	-34.4311	-47.4559	67.6587
979.99	53.3256	-71.7394	-36.2961	-58.036	-58.5439	39.4136	120.568	16.5503	150.285	-9.06281	10.7547	31.3654	28.5617	50.69	-35.8729	11.7035	11.7035	-16.8181	17.3494	-52.6323	59.9766
978.793	36.6091	-68.4154	-27.6768	-12.6196	-23.4315	33.6143	107.06	25.0046	184.286	-18.1915	-7.20699	27.8961	17.959	41.684	-32.8838	36.0371	36.0371	10.5546	-13.6368	-63.9109	73.5966
977.594	-12.8972	-44.6124	-24.6263	-38.1871	-41.8741	9.01395	107.24	35.0258	192.847	-16.2938	-28.1451	22.0549	36.264	34.8285	-34.4469	-0.25554	-0.25554	-3.19683	-8.54895	-59.3142	65.183
976.396	4.75925	-57.0455	-20.1863	29.1226	1.38939	8.86372	106.858	35.738	190.192	-11.0624	-27.2927	34.6553	-1.62669	40.1052	-44.1364	6.47584	6.47584	-9.06688	-17.2491	-57.1617	39.0552
975.199	31.7763	-50.5765	-32.4404	25.4638	-28.8466	28.4516	130.032	28.6193	176.94	-8.29176	-18.1293	44.9392	19.8844	16.5836	-42.2868	-5.36441	-5.36441	26.1424	4.80138	-45.2478	37.263
974	57.2232	-58.2797	5.37907	-37.6457	-4.64549	17.963	102.707	14.1968	200.789	1.33627	-5.11882	51.1682	-50.0819	14.7349	-49.9979	0.38811	0.38811	34.4719	9.88243	-76.0357	7.58992
972.801	31.1602	-15.6066	-1.31236	42.145	-50.2811	59.1533	105.536	15.4913	180.596	5.66035	10.6274	51.4273	43.6318	34.5584	-43.0926	32.5159	32.5159	19.0964	59.475	-22.6487	1.35186
971.604	22.2715	-32.7571	-24.6848	-31.3725	-30.6205	-23.6688	97.2128	-1.8577	170.754	2.0614	38.0715	48.1908	63.5185	35.4851	-38.592	6.02594	6.02594	10.0453	-2.21382	-13.1862	-6.74082
970.404	53.9452	-82.9454	24.2317	47.4944	-20.0289	23.1495	97.3931	12.9715	184.261	12.6701	28.4127	16.1484	0	44.283	-23.8578	10.7963	10.7963	26.2712	4.98436	-18.3566	13.8816
969.205	71.5707	-65.4641	-6.08442	-41.4588	-10.3469	15.488	92.9871	8.92843	203.78	18.5144	22.215	-10.9927	28.887	37.8676	-12.2501	33.1397	33.1397	9.32734	-25.9528	-49.1247	12.426
968.006	64.2393	-38.5515	8.07367	-57.4309	-7.01135	17.2182	72.758	26.5515	226.94	22.3667	-0.87819	3.15606	48.1437	11.2285	-4.33072	34.9744	34.9744	61.8628	14.0771	-29.9092	26.6641
966.805	134.866	-13.2214	0	57.8857	20.7883	29.2746	68.44	39.617	247.897	18.2858	14.2023	24.7431	22.5119	-5.11661	0.35974	51.4484	51.4484	-10.332	30.7973	-20.4474	57.178
965.605	116.614	-39.7894	21.1253	24.1932	-15.7382	57.279	73.0966	49.7987	270.94	26.8756	30.1337	45.502	49.7756	24.0348	-10.2089	20.1007	20.1007	43.7658	32.6902	-18.3009	79.2403
964.404	157.592	-49.054	14.47	12.3891	-12.3987	25.2244	106.501	58.3609	263.226	36.5881	43.6433	71.7555	43.3809	39.2643	-17.951	20.961	20.961	14.2089	16.589	-25.8979	81.6128
963.205	144.018	-17.4496	18.9239	45.3624	1.80283	36.3336	139.832	59.9683	240.178	42.8246	56.3492	77.5443	65.8242	41.7651	-15.7325	46.2072	46.2072	19.3724	48.1141	-34.7114	113.178
962.004	213.019	0	66.4089	58.5464	16.9078	77.454	128.79	81.6775	246.696	58.2642	86.8256	97.4361	51.4204	58.0039	-23.9182	44.1363	44.1363	45.0414	11.9135	-42.3018	103.284
960.803	266.416	-7.4281	56.9734	48.8264	66.4023	51.0414	141.016	97.0809	219.371	67.2488	90.7053	122.784	67.4484	69.9153	-10.4781	48.8917	48.8917	34.4271	36.0225	-21.8881	97.761
959.602	310.451	63.69	83.6191	107.797	100.494	84.6434	161.65	96.1854	204.575	68.9657	102.758	147.006	53.0498	73.9171	7.46136	53.6452	53.6452	50.6229	32.6241	-2.6991	95.7823
958.4	315.543	45.2589	57.5362	112.639	96.5732	136.043	199.115	104.282	234.495	69.6032	95.1086	168.213	125.098	98.2243	35.1202	63.2703	63.2703	74.6951	48.2604	22.5677	102.855
957.199	367.335	86.5051	121.623	133.085	93.5586	148.998	214.749	123.868	252.647	75.945	93.3632	174.797	91.4886	117.409	48.1958	85.5605	85.5605	89.3011	35.3458	-42.2124	102.806
955.998	335.061	72.7869	151.015	136.882	114.061	172.256	239.675	143.402	277.473	95.2162	92.6907	212.082	139.5	127.677	66.1062	108.816	108.816	80.263	61.5456	62.125	111.562
954.795	312.136	142.267	183.169	200.996	170.73	220.801	269.066	156.166	338.271	124.721	113.063	254.307	153.896	148.913	90.9328	123.296	123.296	109.044	105.701	32.6361	169.341
953.594	256.548	196.026	234.719	245.328	240.032	248.72	296.679	182.427	402.093	161.221	125.727	299.428	182.682	189.054	114.256	149.458	149.458	142.539	104.405	37.2058	236.386
952.391	200.983	240.352	293.179	310.438	226.15	315.026	337.458	235.717	457.169	206.79	153.96	337.228	238.645	205.312	148.059	163.924	163.924	180.748	161.212	118.371	277.69
951.188	118.999	245.441	298.959	324.597	281.863	317.638	387.48	258.195	502.177	234.221	173.092	363.725	256.212	240.071	188.584	199.803	199.803	207.919	179.974	132.649	319.119
949.984	150.557	297.583	315.821	337.712	366.469	388.587	404.551	296.88	527.753	263.618	195.202	369.393	286.561	237.235	200.515	236.642	236.642	224.058	221.96	183.383	306.709
948.781	115.255	265.024	306.358	324.851	373.351	350.002	448.379	305.78	507.176	268.693	200.52	382.154	342.471	234.768	216.826	221.887	221.887	271.674	198.471	139.32	318.222
947.578	78.4103	241.884	296.898	342.117	298.038	319.855	434.156	302.028	466.953	267.33	207.623	354.751	296.088	236.202	210.073	249.95	249.95	279.927	176.047	151.157	308.566
946.375	80.4321	185.836	222.362	270.066	211.015	240.133	408.667	264.952	440.629	247.353	207.244	322.932	235.342	244.355	187.802	211.85	211.85	212.649	212.733	135.054	275.457
945.17	63.8084	129.809	197.694	132.633	214.316	179.152	362.463	218.865	370.796	223.335	177.686	250.652	214.556	247.69	138.593	202.943	202.943	161.13	174.486	137.175	245.39
943.967	64.28	47.1652	145.352	130.204	101.165	173.371	309.395	157.132	315.455	186.315	155.822	196.915	125.102	207.4	104.583	187.233	187.233	141.088	95.1089	111.369	222.655
942.762	36.7943	78.92	83.344	58.2402	103.585	131.128	265.842	105.612	279.367	163.458	134.107	139.767	123.506	190.486	68.5679	164.722	164.722	166.659	72.7208	103.783	207.603
941.557	1.55513	43.3094	73.937	73.4725	46.4483	119.752	212.949	77.4136	236.859	145.83	110.779	118.853	105.945	146.817	38.2367	141.249	141.249	104.173	93.5793	85.2771	186.285
940.354	40.8523	6.14565	57.6165	88.6961	66.9194	49.4929	178.269	60.0626	236.664	130.194	104.699	97.2458	88.3915	119.322	14.3664	136.25	136.25	93.5852	36.4052	59.4961	150.663
939.148	18.0451	8.14115	30.2382	18.8583	67.5421	55.8934	164.288	32.9637	233.453	103.365	74.0251	92.0224	62.8653	113.477	12.4553	107.932	107.932	84.5745	11.9327	22.8082	123.806
937.943	44.9089	-8.64946	47.1208	50.6852	89.809	51.0796	166.501	29.8248	198.796	88.4804	65.21	85.3244	13.4155	68.5316	1.54262	78.6527	78.6527	58.2821	23.3047	41.9326	74.6693
936.736	22.1091	-8.21588	16.9908	58.6548	4.77302	13.5741	131.38	47.784	169.92	72.7116	64.6308	96.8735	80.4386	61.1312	13.3238	49.3849	49.3849	46.1407	18.8656	22.2434	75.7138
935.531	42.7577	-35.9505	38.0165	48.9945	0	51.7339	69.8821	66.7478	163.257	65.1066	59.137	93.2704	23.0296	35.1831	9.4668	30.8112	30.8112	27.7201	24.9638	18.3232	67.2573
934.326	6.00897	-71.4971	39.6859	46.5942	38.9761	59.0639	41.318	68.0403	151.556	54.8442	71.8612	81.865	10.2927	46.0849	9.88873	52.0545	52.0545	15.5886	13.1524	15.6171	49.3968
933.119	31.3044	-31.9449	9.57505	-23.1617	59.9174	30.9156	35.7507	51.1696	133.137	41.2904	64.5036	68.1431	32.6363	63.5674	9.04857	43.1951	43.1951	12.8839	7.27982	52.9125	70.3919
931.912	10.0768	-54.9659	15.3947	20.0467	51.1187	68.1193	31.7888	32.2661	139.125	31.3525	50.8425	44.3548	29.467	42.8003	22.8782	41.1333	41.1333	32.1587	-14.2947	10.2128	63.3181
930.705	44.6639	-27.9409	23.9745	1.08402	19.804	44.6469	60.2238	28.2706	133.604	22.2399	66.5264	34.903	7.1741	59.932	24.2431	55.5693	55.5693	52.9958	-8.48883	-15.5077	63.6817
929.5	14.1441	-50.9543	-13.0211	12.1618	7.41234	15.5837	91.9957	25.197	122.616	21.0971	69.3838	33.8734	50.2196	47.3663	25.0312	29.2501	29.2501	34.5923	-14.2644	41.1602	55.2284
928.291	45.6175	-30.1915	14.8915	29.4559	-3.16834	4.26047	152.153	11.8046	138.778	5.469	69.8885	20.4761	32.711	47.3608	11.3	22.3417	22.3417	31.8876	14.6927	72.7597	62.9073
927.084	46.0947	-67.2591	-0.000383882	1.18647	18.6633	45.1727	179.922	-0.22868	129.321	11.7764	64.543	15.8216	-10.2761	56.1944	12.547	35.803	35.803	15.0651	-1.60494	20.7928	79.3618
925.877	65.1594	-41.8143	-6.60551	42.2818	29.6856	54.363	206.851	-7.65661	127.302	25.2736	65.3288	18.4007	21.6008	61.1994	15.0105	37.623	37.623	42.1637	9.45464	10.0091	66.5976
924.67	88.8629	-63.2437	24.0493	9.88242	55.1028	68.2119	169.189	17.2572	133.8	29.3298	65.1344	17.3822	23.2138	63.2412	18.1324	25.8695	25.8695	25.3461	-19.4565	53.6997	81.5361
923.461	87.7846	-28.4372	-6.01082	43.7219	52.6206	69.0068	150.482	38.3173	148.587	35.8009	66.8356	27.2992	-51.584	62.4686	19.8331	31.5677	31.5677	6.96818	29.4596	71.9622	82.3016
922.252	78.9657	-59.2289	31.5297	46.5134	44.7422	25.9976	133.27	46.1874	135.146	38.6131	76.269	16.702	69.411	92.0094	5.29098	22.7271	22.7271	35.6214	8.96826	63.5988	92.5901
921.045	108.844	-27.5596	29.0614	85.5024	41.3622	59.4131	100.686	54.8721	145.448	43.4093	64.4232	37.8419	18.5019	105.114	-0.82778	65.2428	65.2428	39.1884	41.0409	60.0756	98.1014
919.836	106.216	-27.1204	7.29106	62.4329	45.1799	69.5267	101.082	74.6755	162.347	54.5514	77.11	49.3957	8.97782	106.48	-6.88457	51.5553	51.5553	70.9584	8.99529	109.775	99.2168
918.627	120.608	-7.95347	44.8077	84.8656	129.913	86.1569	87.251	79.5231	150.202	57.6117	117.923	74.2543	23.3172	115.934	-12.7183	57.244	57.244	63.5525	46.311	144.944	118.86
917.418	134.994	15.8873	43.7175	120.729	60.0035	79.4988	96.8929	105.217	130.337	78.9514	147.177	91.5871	23.338	111.596	-8.23549	59.057	59.057	60.8484	73.1071	136.575	116.136
916.207	123.082	14.7592	63.299	98.705	106.958	124.056	134.117	103.452	143.53	83.0514	150.049	121.168	16.9989	89.9309	3.27781	74.4237	74.4237	61.2782	40.0252	140.301	130.266
914.998	171.481	5.83209	63.5836	108.72	109.863	116.463	131.63	96.678	151.842	108.978	157.079	127.631	64.713	94.3972	23.8578	82.0406	82.0406	88.3232	83.6147	179.071	149.619
913.789	255.419	35.8947	76.2658	105.301	98.394	97.7041	127.662	84.5079	173.576	126.455	175.397	145.768	96.5143	94.4687	43.6592	109.011	109.011	41.7865	69.4414	187.619	153.227
912.578	200.213	33.2047	91.6983	102.92	134.537	124.552	125.588	86.1263	192.77	133.108	194.088	167.076	102.878	90.674	51.8652	124.359	124.359	68.8261	62.6233	269.86	173.339
911.367	192.936	47.6632	98.8631	158.374	126.662	152.321	163.894	87.4586	214.525	132.159	199.84	191.509	37.7418	128.441	69.1182	138.733	138.733	75.5137	45.3125	245.778	173.964
910.156	205.748	62.1163	119.792	183.864	112.506	193.102	169.183	109.607	240.97	132.149	206.006	205.53	75.8844	157.377	66.3801	139.561	139.561	188.581	96.2146	288.125	191.113
908.947	252.541	50.073	146.219	160.821	116.308	206.895	147.071	146.87	266.122	148.032	212.415	225.652	74.3068	164.68	73.5991	165.532	165.532	129.548	100.935	283.366	198.777
907.734	235.992	98.7958	136.856	230.687	131.78	208.598	182.411	173.925	297.382	151.458	239.739	223.597	107.664	198.353	83.9729	150.884	150.884	129.966	71.0415	279.82	216.752
906.523	239.523	183.325	181.156	183.915	212.75	238.189	178.518	180.004	311.765	171.573	236.587	230.865	137.833	225.378	96.7262	162.342	162.342	163.218	112.471	281.102	223.614
905.312	260.037	127.661	195.176	234.144	247.037	243.603	206.735	190.088	317.625	204.074	241.827	243.59	115.61	231.257	105.757	175.728	175.728	138.617	107.751	306.518	226.707
904.102	289.805	120.287	224.319	224.526	208.655	241.58	228.267	199.984	347.041	214.157	237.815	266.033	148.94	215.409	115.08	172.682	172.682	184.358	93.5977	368.119	226.064
902.889	233.137	133.154	228.7	216.978	256.385	283.229	225.097	191.486	370.623	236.692	254.455	261.34	79.1231	229.329	116.984	206.35	206.35	192.578	103.558	312.694	248.587
901.676	261.356	180.258	275.699	258.928	284.37	302.567	238.888	186.969	361.089	253.027	293.617	276.46	91.8246	224.542	107.012	212.959	212.959	160.176	136.568	375.479	251.585
900.463	183.119	163.543	275.944	254.47	290.83	324.685	247.494	182.944	362.657	272.262	322.053	293.354	167.964	221.991	106.093	241.777	241.777	196.515	177.948	391.216	261.008
899.252	211.336	167.059	278.938	273.719	283.841	266.005	265.996	185.344	357.725	270.779	347.414	318.695	152.099	252.234	105.516	262.86	262.86	196.92	115.607	412.972	288.853
898.039	247.254	187.686	314.908	300.178	259.831	274.195	264.361	210.634	372.216	279.25	364.28	324.758	167.95	245.592	99.6201	274.28	274.28	203.571	184.205	419.053	314.323
896.824	158.274	217.637	300.035	229.778	276.151	298.164	266.826	235.418	365.991	284.994	373.355	322.994	193.306	249.065	100.925	268.322	268.322	243.004	212.988	490.21	344.638
895.611	225.018	160.5	276.926	198.548	209.156	298.921	276.338	230.586	370.496	280.049	387.1	307.188	139.41	265.124	109.202	292.282	292.282	240.279	148.585	491.455	350.184
894.398	242.419	188.889	251.079	240.457	234.434	273.698	294.196	208.827	356.565	290.837	379.757	293.868	163.176	270.523	112.289	270.887	270.887	212.587	205.623	451.744	333.207
893.184	279.845	110.02	241.72	267.938	303.581	251.269	278.796	189.386	343.259	292.813	380.756	293.972	134.655	270.348	111.599	285.19	285.19	239.515	170.55	463.84	328.623
891.971	297.229	138.409	236.481	260.401	257.211	258.528	232.501	192.759	332.379	287.847	377.962	297.647	115.648	250.318	121.385	302.382	302.382	238.353	152.23	445.825	321.336
890.756	296.123	174.556	233.99	236.401	263.672	263.932	212.632	176.981	332.824	290.108	375.293	278.474	148.907	249.722	125.089	293.531	293.531	232.513	169.485	442.267	341.725
889.541	258.058	84.8619	275.41	267.985	272.815	263.77	209.792	195.167	310.539	290.054	383.878	289.982	167.904	235.352	128.137	295.289	295.289	236.032	163.725	386.953	318.132
888.326	300.072	152.068	249.59	273.833	315.955	322.936	195.333	200.868	288.174	287.121	379.377	295.534	163.148	231.91	133.444	253.672	253.672	255.139	132.87	368.968	317.261
887.111	283.572	169.559	274.532	271.45	331.348	302.375	204.283	215.394	288.336	278.945	364.489	314.697	152.064	246.641	132.122	278.565	278.565	221.243	156.393	420.776	349.601
885.896	293.245	207.225	295.349	261.869	237.619	353.171	233.228	231.46	313.232	275.925	343.347	328.137	172.631	232.682	137.096	279.361	279.361	268.398	175.725	385.95	353.712
884.68	307.53	224.699	284.624	282.118	285.216	340.952	245.245	276.815	328.962	272.598	329.322	340.606	191.609	237.354	132.562	275.34	275.34	261.002	150.113	383.615	356.422
883.465	291.04	223.542	342.445	284.877	221.931	336.146	261.099	279.133	322.992	269.845	312.367	346.754	201.089	240	136.998	251.094	251.094	253.608	184.068	298.305	358.637
882.248	337.623	185.148	307.043	341.093	284.709	323.935	292.18	288.687	330.744	271.18	279.962	341.035	163.121	246.842	141.381	262.487	262.487	236.872	221.144	336.866	344.741
881.031	348.816	227.438	294.952	240.042	292.947	322.84	268.754	305.441	320.515	273.034	245.351	354.849	145.723	263.984	147.837	257.509	257.509	207.686	170.472	299.684	345.918
879.816	330.791	210.771	296.565	320.904	328.879	340.259	275.73	296.903	324.135	283.372	227.285	357.828	177.337	259.261	156.346	261.196	261.196	222.104	154.279	337.026	341.893
878.6	326.609	220.475	306.397	322.632	218.291	333.609	293.971	283.716	342.996	295.407	233.081	362.638	208.94	264.659	147.035	241.783	241.783	200.715	157.931	236.176	343.521
877.383	303.984	234.826	295.682	281.22	356.049	324.185	312.068	278.926	341.929	300.575	263.181	390.017	177.321	272.28	150.277	261.829	261.829	215.129	198.116	314.365	314.387
876.164	252.171	218.17	319.203	317.877	327.658	360.101	330.242	283.893	344.766	309.121	277.66	388.872	188.373	284.83	147.149	247.234	247.234	235.763	171.494	283.226	305.638
874.947	297.172	265.062	309.859	340.142	319.811	345.127	352.483	269.628	341.984	316.516	295.96	406.136	202.579	289.801	141.29	280.736	280.736	248.61	193.923	292.927	309.615
873.73	256.135	276.298	327.894	360.346	301.256	354.204	356.407	268.139	340.462	313.391	316.268	429.564	167.821	270.987	131.329	261.335	261.335	216.345	143.316	300.223	310.044
872.512	299.582	258.095	344.554	298.438	339.829	354.033	309.205	287.023	329.744	301.626	323.543	419.995	153.604	262.296	111.031	274.63	274.63	216.751	161.571	279.91	298.594
871.293	353.761	253.839	305.11	262.208	286.481	315.035	288.377	270.339	286.329	283.824	323.792	382.677	182.017	265.014	102.324	242.741	242.741	231.15	150.619	270.407	311.212
870.074	470.864	231.002	301.249	277.291	304.524	303.78	265.512	272.405	274.083	255.601	291.638	342.677	139.392	238.481	102.136	240.658	240.658	158.493	168.866	270.508	320.13
868.857	699.97	178.755	252.256	267.748	265.472	317.48	234.383	264.875	233.164	239.04	243.636	302.821	112.564	231.01	101.438	241.458	241.458	177.56	145.408	247.812	318.312
867.639	942.798	224.054	260.713	271.544	261.218	274.817	251.849	255.063	251.573	226.868	215.307	277.159	186.723	228.592	118.771	197.104	197.104	198.174	168.86	283.903	306.856
866.418	944.644	182.665	237.724	334.813	228.438	274.664	283.353	270.334	315.512	226.462	193.102	273.479	172.517	222.98	136.201	213.28	213.28	206.352	127.699	234.836	290.155
865.199	880.527	226.398	266.684	288.363	275.897	317.918	378.136	314.361	425.604	250.611	190.975	329.662	185.127	251.044	196.137	226.569	226.569	178.802	150.104	231.348	298.225
863.98	716.744	280.945	348.93	390.551	355.424	373.159	513.543	425.63	558.017	307.53	198.21	455.153	271.844	298.988	285.8	263.857	263.857	270.84	163.126	231.459	333.158
862.76	539.225	398.889	470.769	539.841	496.407	530.856	657.034	544.493	681.323	381.69	236.219	645.424	421.59	367.125	389.262	304.009	304.009	265.026	238.63	268.727	376.722
861.539	412.368	629.682	603.489	676.779	625.755	708.798	797.407	661.484	802.88	450.861	290.371	838.48	522.414	427.253	486.936	418.048	418.048	394.27	330.763	292.8	454.404
860.32	290.159	874.301	774.4	904.829	796.914	893.129	854.279	752.805	870.207	521.062	340.343	957.399	657.868	497.158	555.426	473.508	473.508	489.317	406.204	330.04	497.145
859.1	263.014	876.119	778.648	950.494	862.923	988.815	889.35	777.653	844.035	549.6	367.523	1002.58	711.338	521.92	589.957	529.906	529.906	536.223	468.085	394.82	544.565
857.879	189.913	811.476	767.877	849.716	783.771	839.083	836.741	760.497	785.323	539.942	368.405	962.464	708.075	484.499	582.506	541.199	541.199	531.914	496.644	351.789	557.726
856.658	179.65	646.415	605.595	658.887	648.567	710.623	732.489	694.513	658.475	505.063	339.02	849.421	605.588	443.382	524.655	452.749	452.749	479.522	376.414	353.079	506.546
855.436	181.645	467.514	473.4	527.504	515.199	533.343	602.17	597.678	523.096	433.478	284.547	675.446	499.992	382.804	432.838	390.221	390.221	337.201	334.247	290.923	420.417
854.215	157.606	339.657	367.182	400.262	384.55	404.993	464.543	475.375	397.187	345.421	216.882	484.24	361.375	303.438	324.806	289.373	289.373	258.508	273.376	180.913	326.648
852.992	135.108	216.484	293.747	310.931	270.859	286.835	336.449	359.097	288.276	261.125	150.235	338.418	262.164	241.819	246.034	230.736	230.736	232.555	187.575	185.829	255.452
851.771	72.8207	189.092	210.792	244.137	233.71	262.723	228.847	297.732	212.061	190.571	94.4817	236.635	194.467	191.602	185.176	157.748	157.748	189.561	140.271	164.42	188.554
850.549	68.7133	115.398	160.599	194.76	206.361	182.416	168.883	242.455	178.069	142.301	59.9927	180.344	139.384	159.223	143.281	140.356	140.356	151.235	70.1208	59.2874	149.333
849.326	96.7411	105.015	119.97	107.568	142.567	145.439	142.692	189.84	162.737	106.582	60.0536	163.143	74.8841	133.836	116.748	87.5301	87.5301	111.374	54.0355	86.9496	133.371
848.104	95.6915	106.982	92.9874	129.804	166.81	138.871	99.6096	149.984	113.676	90.8425	61.5142	146.73	89.0522	128.714	96.2805	82.6097	82.6097	85.47	122.114	53.6189	125.069
846.881	83.935	82.72	91.9104	113.189	127.048	145.198	76.967	116.23	80.01	52.9616	70.9129	140.008	71.7637	100.017	71.1705	36.5177	36.5177	79.7097	26.0394	28.6702	124.522
845.658	63.0088	60.0099	58.1314	105.779	33.0934	127.584	55.445	94.6255	66.2294	24.793	79.7812	119.858	59.1987	79.2111	46.6462	24.9078	24.9078	58.4678	7.89565	40.7851	104.184
844.434	43.62	-2.78935	93.8457	73.8539	46.6852	86.0472	53.1916	78.3172	63.2076	18.8872	74.702	112.26	-13.0945	75.7897	25.468	26.7024	26.7024	40.3314	22.9882	44.5331	42.8911
843.211	79.2702	-6.96986	65.528	77.693	52.2748	72.1344	60.0646	63.413	32.6904	-9.78297	63.1911	92.4466	16.7958	68.6339	-2.5702	20.8406	20.8406	14.4624	22.5013	30.3556	-4.81197
841.986	67.5277	21.2273	48.1166	45.7872	17.899	72.9512	59.852	50.7736	10.7776	-19.6524	44.7152	84.008	-24.0345	64.8231	-7.25288	8.28355	8.28355	-11.3955	6.44654	-23.2341	-26.0707
840.762	80.2392	20.1276	38.8814	64.9524	10.1759	78.3679	35.0844	57.5052	-1.96193	-30.5118	24.4424	55.6517	-11.4346	54.743	-4.04288	-10.9647	-10.9647	24.6451	-32.4324	19.9387	-36.2936
839.539	74.6125	8.24026	14.6753	55.5205	13.1073	74.5832	22.8956	65.5798	-0.15369	-34.5508	3.03142	31.7824	24.7207	44.5964	-14.8017	2.31213	2.31213	3.43548	6.51964	32.0461	-1.59462
838.314	64.4067	-12.886	36.7536	29.7645	12.49	16.5456	26.1227	63.5775	16.4847	-23.1741	-0.61572	20.1809	-3.5241	31.8949	-20.8711	-10.2341	-10.2341	-10.0318	-26.1196	45.3456	17.446
837.09	96.9645	-32.4633	23.4441	38.7179	39.3838	51.3924	23.3371	61.8404	21.8157	-13.4131	4.7843	33.5778	10.6345	26.2057	-18.0637	-29.4675	-29.4675	27.5342	-3.77692	19.2505	38.2989
835.863	158.519	3.41368	42.7919	46.6516	13.034	23.7192	25.5241	49.0037	-6.60494	-9.73176	25.9957	44.2705	-5.03787	31.8087	-16.6769	-12.3718	-12.3718	21.7987	-16.6977	14.6498	49.8197
834.639	145.251	-8.45959	21.3255	-2.54911	7.98276	41.0894	52.0415	46.0411	19.8246	-15.2645	34.305	42.0212	1.26808	32.6084	-23.7148	-31.5974	-31.5974	28.4302	-26.5043	2.89001	54.7121
833.412	183.879	4.30566	39.3064	29.8699	15.3532	31.8074	82.3912	47.0739	38.3788	-16.1161	26.6624	54.8643	-45.7796	46.4765	-20.966	5.55654	5.55654	14.9702	-15.5747	7.83878	49.8706
832.188	140.092	-1.40577	32.8056	39.8388	35.1331	75.812	82.8678	46.2008	81.1501	-4.10716	40.0346	58.7635	-45.7435	58.1844	-7.02903	-11.7546	-11.7546	29.3262	15.0398	-11.0702	19.2264
830.961	110.054	-11.7308	54.8557	28.3972	79.7321	67.4458	84.7291	67.8059	81.4796	-2.73401	54.1945	77.6606	21.7403	69.5904	-3.30194	1.50364	1.50364	17.4164	-21.7048	15.3446	4.85628
829.734	105.958	21.0305	78.2563	136.225	64.039	90.3067	60.7618	90.9758	99.3921	11.5473	44.547	91.4802	32.7411	85.7496	6.68692	14.7566	14.7566	25.5896	55.5172	52.4797	9.2028
828.508	43.9141	83.0076	113.878	70.7555	78.484	163.657	49.7903	121.385	134.852	15.0055	37.7253	100.144	7.67518	97.3072	18.7303	11.7743	11.7743	18.318	16.7081	49.073	19.9743
827.281	76.4271	69.5965	133.182	152.041	83.1773	177.311	20.9551	140.335	141.128	17.1267	30.7997	105.963	18.6743	91.9766	27.2923	25.9745	25.9745	74.3481	40.0456	82.6126	55.0515
826.055	67.7682	108.474	111.729	167.077	87.8691	100.098	11.8668	151.307	145.176	32.4453	37.6707	102.587	34.3711	82.1065	24.5132	29.6714	29.6714	93.3107	54.0563	56.5634	50.9469
824.828	49.9682	64.3147	125.593	131.18	102.302	144.041	8.63529	148.001	134.475	40.1703	23.8195	103.839	17.1546	71.5009	26.589	55.3121	55.3121	73.6845	28.7273	56.7333	58.3883
823.6	61.1279	34.008	83.7838	50.4933	70.6851	111.821	5.31553	126.42	107.943	37.4489	33.3612	85.1309	34.4124	75.3888	25.5941	20.8432	20.8432	-4.56525	23.073	74.7719	44.7951
822.373	55.5255	29.8387	58.2805	70.6327	67.4097	50.261	30.6128	112.738	101.527	25.5379	10.8382	56.8826	-25.0897	57.4611	17.2525	39.7991	39.7991	28.2861	25.6976	68.985	46.6341
821.145	54.4944	-32.7161	36.8597	-31.3856	48.2052	56.5901	39.2168	98.5657	94.4306	4.14643	8.44121	33.9004	0	51.4209	10.1456	16.7896	16.7896	47.2444	15.9084	-5.8506	35.5921
819.916	94.5835	0	16.8045	97.6661	59.9837	41.8287	50.2789	81.9905	76.9881	-11.6634	6.59445	-12.1161	4.13156	42.5315	13.1814	-24.3253	-24.3253	53.859	-10.4253	62.186	26.2493
818.688	52.4347	-7.99842	13.0382	78.1054	-42.3846	26.1566	63.3831	72.0716	59.3011	-15.2213	14.271	-32.4628	-18.351	37.7947	12.161	-28.249	-28.249	14.2189	-6.75984	59.9794	9.94377
817.459	97.0757	-25.2069	-17.4947	36.1714	36.6415	28.8215	49.6253	52.3617	58.3098	-28.2114	26.7717	-38.3765	-11.0864	43.7458	10.4783	-3.58054	-3.58054	19.2963	10.3449	60.1539	18.2185
816.23	48.8563	-13.2371	8.97859	13.5804	-16.1503	40.6493	51.8557	43.3389	84.6607	-42.9845	44.8791	-30.4018	-38.2508	56.1482	7.46869	-2.7427	-2.7427	42.8655	-51.117	69.8461	21.7855
815	55.4379	-18.1547	24.5955	35.7067	46.9252	36.8993	40.3737	45.9359	84.1131	-40.1939	48.2336	-18.8744	-35.6762	47.7319	12.9814	0	0	-5.99256	-13.339	85.4845	30.2223
813.771	80.274	-18.4678	29.3601	-23.5418	19.7927	27.6537	55.2719	39.8008	87.6539	-17.9747	53.8887	12.5437	-1.81952	52.6708	4.43696	-0.92603	-0.92603	39.14	-21.041	29.7641	31.1761
812.541	48.8202	22.6509	23.281	57.5207	28.9159	74.2779	35.7984	54.1137	104.083	-6.72903	46.9593	51.5636	-28.9668	58.5671	5.50125	-10.42	-10.42	75.0145	-20.4741	103.663	26.3357
811.312	53.8777	-19.0901	42.9508	49.11	39.8011	50.3791	1.16656	69.2314	124.206	-12.8249	43.0544	72.3483	-81.1225	80.8811	-3.20708	1.98628	1.98628	0	-19.9084	37.264	26.0638
810.082	36.1265	26.6148	51.7755	31.5613	-4.09867	72.2639	-27.1962	93.9498	133.056	-26.6531	35.7188	88.9524	7.44158	76.3105	-13.2907	2.967	2.967	34.2627	9.57318	105.191	9.45355
808.852	19.9019	-21.2415	64.6607	57.7057	73.9326	86.8183	-51.747	99.8029	129.932	-40.7783	48.6192	75.8244	-22.8163	83.3152	-22.2539	26.7886	26.7886	20.7934	10.1343	114.869	-0.60452
807.621	31.0431	-13.8832	43.683	37.1163	-34.4335	72.0845	-46.9277	106.425	94.2696	-46.9023	44.3107	54.5367	7.88274	77.4671	-19.5396	10.6375	10.6375	39.6487	33.4051	148.303	-15.5314
806.391	60.4154	11.8674	45.7328	13.489	61.2354	82.0593	-30.5617	94.6637	82.7569	-48.3742	51.4591	39.1277	-12.9882	64.0588	-18.083	4.95782	4.95782	40.0322	18.4809	105.707	-38.1822
805.158	54.8322	-19.0957	38.3068	33.5348	62.3983	50.8695	-19.364	83.3574	68.1493	-50.8415	61.4956	49.7434	-43.2211	53.096	-16.3882	16.4029	16.4029	37.3397	-9.85014	170.009	-34.5542
803.928	38.6193	-13.2731	28.1757	27.1762	20.3049	48.956	-1.66991	64.866	63.3015	-47.8913	75.766	25.4227	-54.7025	46.8412	-14.2399	14.5289	14.5289	46.9524	0	127.427	-14.02
802.695	71.0106	-30.43	23.4631	21.8391	11.7681	-12.3881	25.6476	59.1738	40.6202	-36.5107	47.4477	9.05736	-14.6494	37.7811	-6.34365	14.5592	14.5592	-9.56277	-5.07485	95.548	-0.10346
801.465	79.0948	-46.0501	1.16258	45.929	-34.7097	31.4212	26.855	42.078	35.1944	-18.9672	34.1917	5.98819	-19.8865	43.828	-2.87397	-12.028	-12.028	21.5804	7.3818	123.021	14.5495
800.232	68.9596	-34.0966	-3.54225	-1.00448	32.6385	18.5473	3.30383	43.6339	36.791	-20.8307	30.7842	2.75078	-40.7277	45.4412	2.26332	0.36329	0.36329	38.8777	-13.1571	105.396	9.89632
799	92.2203	-3.77447	21.5089	-4.30217	-9.41172	24.869	-35.1052	35.3691	32.0183	-21.2132	38.3817	6.29467	-28.7893	52.6291	-8.82172	-11.9551	-11.9551	31.5781	9.60723	91.3374	5.08524
797.768	79.051	-8.67161	8.68936	24.8545	-32.0438	23.8794	-69.2767	26.7197	26.8737	-17.9891	69.6921	2.33484	-41.8186	63.1332	-15.9855	-4.31804	-4.31804	18.1353	-3.70886	40.515	28.2542
796.533	62.8537	-24.2776	1.28403	1.27888	0	-7.25192	-111.494	8.42307	13.027	-15.9171	82.2013	-0.45025	-47.0411	67.7534	-17.0797	-9.0296	-9.0296	9.30753	-9.80419	72.7279	41.981
795.301	81.5516	9.08636	10.1004	21.3005	46.9107	38.4357	-101.532	24.2019	-0.67678	-9.28858	81.4024	10.0227	-24.1902	83.4344	-15.9158	31.8418	31.8418	34.2738	-11.7779	90.6983	35.3325
794.068	51.7121	17.9597	32.4274	31.1796	3.02602	85.052	-74.8399	29.7768	15.8898	-9.78535	88.8979	32.1382	-13.8224	76.0419	-14.879	11.9329	11.9329	31.5885	-8.60036	106.291	30.7955
792.834	65.8563	8.4774	39.8848	32.952	-13.5209	49.4898	-60.3135	27.3593	27.6581	-10.986	100.393	59.6708	-0.33847	59.564	3.17361	15.7654	15.7654	13.5516	-17.7793	112.4	24.8167
791.6	89.0909	32.6429	6.81424	29.6588	-0.9881	36.7606	-54.0549	37.1527	50.0174	-8.22579	107.458	48.8092	27.1684	57.0356	16.5618	13.9022	13.9022	43.1085	-6.36204	122.061	38.2702
790.367	135.053	20.1025	29.1293	62.8296	-16.6491	37.723	-31.898	58.2617	75.2094	-11.1925	67.0738	49.4008	29.7294	73.4261	20.3375	30.0673	30.0673	34.2845	-30.9801	131.716	32.1231
789.133	126.442	4.51224	20.3801	102.068	12.6128	22.2645	-17.6315	84.2197	79.5198	-10.1357	63.5232	40.4958	18.269	82.6727	29.3151	19.6647	19.6647	33.137	-1.03847	130.71	40.2891
787.898	158.743	24.0805	11.6345	12.6996	12.8087	36.9148	-2.45025	81.085	67.9468	-16.9522	78.2103	36.4629	-18.1101	92.5427	38.0457	26.3396	26.3396	33.5243	-12.268	53.9139	46.1844
786.662	198.605	-5.25364	43.3871	37.7641	17.4103	47.0014	4.34459	89.6633	55.391	-6.71803	89.5183	35.0214	4.70952	96.6756	26.4736	22.5824	22.5824	26.2432	9.43077	74.2396	66.4574
785.428	220.278	9.7266	33.2915	64.8401	54.5712	55.2588	-2.03223	80.2492	44.5486	-8.97361	91.5894	13.7403	-6.73788	114.984	23.2512	30.2029	30.2029	-0.97141	4.37588	63.7773	96.8861
784.193	307.051	33.8659	33.994	62.5603	49.4811	90.8627	-23.991	70.9476	44.4109	-6.7469	82.8397	11.1272	-27.5212	109.372	28.797	41.6126	41.6126	34.6868	-11.9886	114.863	115.512
782.957	337.777	80.9051	42.7916	72.4259	69.9105	79.0585	17.4169	77.1752	49.1932	3.01055	91.4865	25.3932	21.7483	125.061	29.0964	16.0575	16.0575	45.8052	14.8392	93.7509	113.836
781.721	380.6	72.9603	112.277	45.8735	68.3428	82.7512	23.7613	84.6933	79.4472	13.2921	123.585	57.9879	30.5377	124.184	47.7841	44.524	44.524	63.0498	21.0972	122.336	110.744
780.484	440.051	106.235	131.844	126.532	136.25	101.02	23.9974	104.898	120.39	27.8584	150.656	102.991	51.771	109.705	72.2051	73.9268	73.9268	68.0291	29.4088	137.899	126.016
779.248	602.362	147.128	146.01	143.459	109.173	98.3313	39.8546	152.689	162.9	62.9246	171.74	152.512	68.3295	112.679	89.3687	75.8501	75.8501	74.5386	64.434	151.091	131.448
778.012	796.374	169.695	205.999	185.653	162.981	192.182	70.8026	192.223	216.1	108.545	173.132	212.819	131.539	134.116	113.142	115.653	115.653	123.933	98.4183	200.932	134.775
776.775	1023.58	257.854	280.788	250.066	228.194	230.451	137.074	250.373	262.161	146.529	206.769	255.247	160.516	172.597	149.69	159.227	159.227	167.182	147.797	230.657	185.961
775.539	969.452	289.542	328.601	306.37	259.991	285.093	210.486	302.253	350.944	195.782	249.159	302.454	197.254	214.617	206.745	189.532	189.532	156.827	190.994	239.097	250.218
774.301	824.64	333.42	376.395	338.408	319.014	369.75	338.61	397.06	466.864	254.485	280.15	406.446	282.164	267.442	255.122	247.273	247.273	192.399	204.401	240.447	301.997
773.064	580.13	394.05	429.558	461.34	398.213	431.623	466.498	504.582	590.91	319.895	340.216	558.95	292.446	330.601	342.757	322.021	322.021	264.688	198.297	342.214	363.268
771.826	400.698	558.318	571.572	563.019	485.288	530.776	629.533	622.568	752.035	427.061	398.557	733.045	428.576	416.35	463.957	375.93	375.93	300.225	279.436	358.899	474.652
770.588	277.24	754.525	768.727	823.182	658.373	778.161	768.42	751.795	830.877	532.804	459.327	878.198	589.506	526.038	597.418	459.138	459.138	395.413	317.446	426.358	550.935
769.35	167.426	984.178	898.503	958.063	809.444	990.889	854.62	824.456	875.764	621.606	505.873	954.79	806.283	604.584	697.194	538.531	538.531	481.385	459.058	472.538	619.556
768.111	121.087	930.373	885.579	939.477	961.333	932.565	854.922	848.409	851.075	664.01	515.361	964.16	873.908	629.971	750.211	699.204	699.204	631.552	537.021	552.933	649.623
766.873	115.535	785.2	840.37	824.025	810.432	826.993	798.023	781.137	732.007	668.064	515.175	879	890.274	629.473	727.577	681.152	681.152	630.293	557.524	540.059	621.26
765.635	119.044	539.576	573.221	561.32	578.879	564.219	657.629	666.679	572.653	605.957	450.607	735.128	582.235	582.757	646.656	618.689	618.689	569.418	508.298	573.21	544.022
764.395	71.2347	359.523	389.566	358.238	362.335	375.161	507.806	525.132	393.203	487.442	384.637	524.94	396.916	508.404	531.588	461.76	461.76	412.283	334.032	463.599	445.855
763.154	82.2964	235.866	246.324	196.586	246.728	273.4	333.624	374.18	237.577	347.271	305.492	306.945	213.224	373.393	396.221	293.558	293.558	226.18	179.31	313.929	341.414
761.916	52.618	125.954	146.16	96.502	171.496	152.602	199.08	252.594	107.892	206.504	230.697	172.942	153.701	254.983	248.182	222.71	222.71	147.09	111.746	243.329	220.472
760.676	41.0537	79.9986	94.425	112.392	108.571	124.491	111.674	169.626	29.9164	95.2378	176.88	88.5988	123.672	151.792	139.84	167.946	167.946	75.6695	72.8977	159.791	139.194
759.436	35.5269	75.1379	81.683	72.8431	78.9754	59.1623	64.7557	132.781	8.36035	30.0081	126.395	48.1618	31.6307	115.374	85.5825	88.6558	88.6558	76.052	38.1623	125.797	91.484
758.195	70.7136	79.4058	58.1977	24.2412	34.4967	54.6848	34.9791	135.028	-5.82785	-3.62454	97.5685	27.086	69.8511	100.397	77.9008	81.1395	81.1395	61.1665	23.9225	78.8529	66.2761
756.953	38.048	31.9697	32.0368	87.4934	23.3308	29.3355	31.2509	114.631	17.2868	-18.7103	69.7428	-1.06017	36.7594	70.9656	57.375	64.1906	64.1906	40.1818	45.5263	84.9561	42.9221
755.713	41.5689	43.8476	24.688	19.771	8.66289	33.0336	22.7817	98.8967	29.733	-15.1217	56.8319	-1.38587	48.6199	62.2797	56.9724	47.2472	47.2472	40.5716	3.65281	47.465	25.6534
754.473	55.637	14.678	11.9713	21.5649	13.2675	5.88301	39.094	83.4846	30.5126	-2.47081	60.8068	-2.29736	-40.232	75.5636	43.9337	41.6317	41.6317	28.7543	-7.49985	79.4839	29.9913
753.23	24.5013	3.76041	0.60374	15.3071	27.5056	38.614	55.677	80.5953	49.3682	-5.69103	62.2525	-0.05853	-9.76978	85.7133	43.8167	36.9638	36.9638	27.6216	39.6797	46.7229	31.2503
751.988	32.5432	-1.07425	38.9036	-49.3347	-2.02973	15.1035	72.7963	84.9912	50.5755	-0.43748	74.5287	-5.94009	3.64458	81.7486	56.9785	35.1272	35.1272	15.8127	-24.6711	76.3778	20.2199
750.746	-0.07998	35.112	16.8001	12.8657	16.5832	7.01713	59.0598	73.6195	37.9904	-0.9992	84.2549	2.34251	0.02135	66.9316	55.8243	33.2917	33.2917	40.6077	8.17412	77.7693	52.807
749.504	16.9973	2.93382	-3.95263	24.7283	27.3142	-7.41141	25.465	75.4446	29.379	-0.56662	91.6691	9.06454	-15.985	73.1261	49.1007	40.8838	40.8838	-6.2658	15.4407	50.9147	44.7485
748.262	35.5742	7.21524	8.83885	18.4775	33.6673	21.6719	28.2082	62.4875	7.0616	-9.89157	104.289	4.43667	31.4752	69.7333	40.2011	24.9118	24.9118	36.8161	-46.8203	47.6052	21.8947
747.02	4.47581	22.1235	45.7662	29.3295	-10.7118	25.3706	1.75781	64.0665	-11.8039	-15.8625	104.153	-2.62277	13.9223	75.6306	37.7932	33.4456	33.4456	38.7317	17.6995	37.2388	13.2098
745.777	26.0587	-8.51329	30.3846	29.1156	6.14181	26.3502	7.86076	66.5181	-9.97455	-14.3084	100.085	-6.58434	2.56555	74.1883	41.7591	-17.3743	-17.3743	14.7433	2.47668	66.8683	3.41536
744.533	20.5513	0.32442	6.96691	18.8511	-1.48772	19.1792	25.4646	52.1943	-15.5849	-21.3594	102.565	-31.716	6.68421	47.2124	26.3964	7.17891	7.17891	21.2339	-28.0647	69.4414	-31.3419
743.289	37.6091	-31.8099	-12.42	-55.745	-4.74288	12.0116	29.346	53.0238	-24.3221	-26.9509	91.5812	-32.505	-43.3276	27.9951	20.3535	4.41358	4.41358	-4.26337	-24.8803	48.4993	-33.3041
742.047	35.1107	-13.8698	0.36168	-35.8385	-15.8651	5.75063	40.8577	79.3654	-13.0729	-30.2396	92.0046	-42.9958	19.5545	28.2478	10.8899	3.53105	3.53105	-6.90888	-44.1698	32.2657	-24.3762
740.803	2.54207	5.58243	-8.29712	-21.9653	-21.7359	-2.31608	66.9456	81.3709	13.3024	-32.05	87.3064	-47.628	-31.9849	32.4861	9.78575	-9.5861	-9.5861	-20.2099	-35.8767	34.8459	-6.70515
739.559	31.6199	-25.0156	-23.6498	-53.3062	-4.01606	37.5906	64.0898	84.8561	25.9091	-38.987	91.6153	-44.1336	-44.8629	29.7093	22.1288	-1.05172	-1.05172	-3.06156	16.3157	24.5001	-1.01145
738.312	12.5922	-2.53365	-0.15617	-58.5148	-37.8316	10.5203	58.4964	61.1254	14.4659	-42.2482	84.9493	-33.4532	-34.5538	32.7054	16.9596	-1.92809	-1.92809	-8.74752	-20.3182	21.2104	13.021
737.068	13.1069	-7.34745	-26.2157	-76.7791	-13.1282	22.3625	45.9175	64.1826	47.239	-41.1151	97.5368	-47.5664	-19.6154	36.544	10.5928	8.48356	8.48356	22.0861	-45.7126	35.5384	6.38485
735.824	49.6791	10.5742	-6.74786	-27.7647	-7.64183	-10.1223	64.6228	49.3029	36.9301	-40.8453	115.763	-49.7309	3.04069	32.8072	11.7422	-26.2552	-26.2552	20.9608	-12.9354	39.2922	8.52357
734.578	36.6681	8.79315	-22.0861	-28.9579	-16.1197	-0.08685	50.6086	40.5142	49.003	-41.0378	107.99	-52.2539	-20.6411	31.8112	24.3332	-27.1247	-27.1247	-24.2713	-30.1569	12.5215	33.4308
733.332	32.673	-23.285	-9.31606	-2.04826	-22.848	-4.52182	47.7894	30.86	46.5235	-37.4284	105.668	-68.7968	-38.1367	48.0625	32.8623	-4.48918	-4.48918	-23.8652	-25.9519	29.1943	35.3449
732.088	39.1907	6.74731	-16.6208	-57.4336	-26.0862	-14.3805	42.0784	11.4291	53.0484	-42.2649	108.615	-64.6795	6.12297	44.3671	43.3949	-10.0636	-10.0636	-6.73597	-22.7701	12.9975	42.3895
730.842	28.7169	-11.6877	-11.8824	-36.5471	-57.2347	-50.4436	41.017	18.8026	51.2495	-45.2483	94.6318	-54.7043	-26.8045	32.3546	46.5107	-8.11531	-8.11531	-32.174	-16.5284	37.8781	65.3692
729.596	31.4187	-10.4329	2.216	-10.6533	-29.0605	-2.45433	32.9341	36.4696	50.7861	-43.5484	85.3396	-38.5643	-22.6835	47.3592	50.0416	-1.46943	-1.46943	-8.97007	-37.8109	19.9825	67.7404
728.348	25.1126	27.1528	-27.814	-20.8676	-54.9586	36.4832	29.2342	42.4099	50.3585	-40.0698	73.3521	-24.6696	-47.8751	54.7511	59.728	0.47878	0.47878	-14.6437	8.18029	56.1813	48.8354
727.102	2.30331	14.7798	13.019	-38.0986	-14.5889	-2.2768	33.6037	42.2823	35.6598	-46.2707	62.5406	-6.86619	2.52405	45.328	71.5833	6.1818	6.1818	-8.16274	-15.1356	90.0199	50.2806
725.855	18.5031	11.4908	-27.6941	-21.24	22.2783	24.0007	40.5473	49.7413	15.4967	-37.0399	48.3602	-6.12405	-47.3385	46.1987	62.4274	4.37066	4.37066	8.94743	19.6252	68.7412	37.7393
724.607	10.7017	18.7951	25.1506	-28.4373	-22.7848	5.1251	44.3236	67.7483	23.155	-36.3379	45.434	-16.9525	-3.1247	50.0152	54.6525	10.073	10.073	1.75553	-19.9767	59.1928	37.1059
723.359	35.8848	10.9723	-3.52253	-40.641	6.23243	-16.4506	36.2292	61.0802	3.89365	-40.5657	50.5188	-11.8425	-31.3815	46.8382	40.4319	8.13433	8.13433	-9.98794	-17.8118	29.7252	49.9451
722.113	1.09943	16.7605	5.21571	-33.8081	-6.57945	25.1579	17.7153	54.6694	2.95876	-51.396	53.6763	-13.781	-2.60233	60.0512	31.222	30.4503	30.4503	-23.2451	-23.7941	74.0867	78.3125
720.865	6.78966	13.4778	-3.40914	-50.0109	15.4567	-18.971	-8.5308	40.2432	-17.9015	-46.8267	67.9889	-33.9248	-18.5195	75.3351	16.9869	-11.0454	-11.0454	2.96105	-15.5212	39.9419	80.9034
719.615	-24.983	-6.75884	-16.0346	-49.1792	7.88152	-9.85233	-26.606	28.8316	-9.55967	-48.0984	75.0419	-12.4914	30.2777	63.6697	10.3675	-5.6207	-5.6207	13.9848	-20.4788	58.5161	107.715
718.367	0.18386	9.85507	-6.2805	-31.3303	9.01263	-7.95462	1.0336	27.7594	-15.3893	-50.7281	93.6417	-20.8559	-19.5255	52.9966	7.23692	11.0566	11.0566	-23.5394	0.000680595	11.5073	109.203
717.119	11.8597	2.28667	-1.07148	-14.4889	15.3666	5.6659	-1.95769	21.8141	-12.7536	-54.4455	108.301	-22.3212	-29.2685	55.8824	21.6749	-1.34158	-1.34158	-59.5315	-14.1148	4.32301	100.583
715.869	-16.9019	27.9522	-14.5461	-7.65838	-19.1794	7.56228	15.467	26.7544	2.99857	-56.4964	132.279	-32.3451	-11.2911	41.7877	21.8358	-0.60995	-0.60995	16.7014	-6.86384	10.0171	57.375
714.621	2.25425	-6.8038	21.3469	-50.8624	17.6317	-9.47361	40.2934	27.2672	30.5239	-53.8209	125.634	-15.0267	-5.63742	20.1476	15.8051	5.74538	5.74538	6.48866	-13.8534	19.2197	46.9525
713.371	0.44843	-0.77828	-1.46378	-30.0205	-19.5088	-21.9941	47.3838	40.029	53.2219	-51.0354	130.84	-11.3799	12.3286	21.5813	22.4256	8.34932	8.34932	-15.8448	-34.054	0.33759	12.5172
712.121	-17.8223	-32.4984	-29.5996	-33.1906	-20.1054	-10.1806	61.3152	45.2473	65.463	-58.1185	121.219	-9.73811	-26.6455	13.7143	29.0587	-14.3451	-14.3451	-23.0149	2.67467	56.33	-11.2712
710.871	1.32007	-6.84925	-12.3918	-22.3592	18.4284	-3.77674	66.5265	34.5056	73.8965	-56.4977	131.487	2.75094	-11.7586	10.0945	21.619	0.43931	0.43931	-15.0308	-54.1046	18.7349	-21.4739
709.621	-34.8962	5.207	15.473	-80.5155	-15.21	-17.1904	74.0393	25.4654	81.3925	-62.7615	136.407	8.28035	-39.9443	23.1116	17.9539	10.5349	10.5349	-10.0794	-6.20967	1.03332	-8.1238
708.371	-11.2728	-23.4793	3.34381	-42.6893	-8.85137	0.91954	77.4637	25.7091	80.1062	-50.8203	124.458	11.7911	11.847	28.954	13.8443	5.64441	5.64441	-12.7024	-16.2355	52.3148	-14.6906
707.119	6.35887	-3.88575	-14.1105	-37.8534	-31.1683	-7.9854	87.6042	27.2281	90.882	-51.9531	104.417	33.116	-34.7791	22.2947	4.12139	10.1173	10.1173	-47.1212	2.18234	6.56118	14.7741
705.869	-11.8981	-5.41286	-4.91357	-36.0196	-24.8074	10.116	91.722	6.62937	97.6908	-58.3055	96.8626	20.7749	-19.9011	17.9672	-3.8839	0.54885	0.54885	-11.8885	-28.1483	16.9192	47.5517
704.617	-34.6353	-23.5286	0.28372	-62.1532	-2.80908	6.61336	71.1772	-10.1297	93.9809	-54.4939	91.6636	11.7275	-14.2481	19.8632	-6.34197	0.34186	0.34186	11.2224	-23.9474	41.2933	70.2795
703.365	-28.9673	-3.94904	-15.8279	-67.3016	-26.8482	-7.68489	65.0841	-21.7008	81.0151	-57.443	74.7115	3.88508	-31.645	29.1863	-21.9357	-2.67198	-2.67198	2.54551	4.6119	20.1003	73.1464
702.113	-24.7992	-40.1458	-3.97367	-66.4561	-22.2229	-39.9687	71.1624	-38.7906	87.4776	-53.5994	52.7887	-3.17895	-22.9187	32.1019	-17.2296	0.86318	0.86318	-0.07585	0.68694	35.1204	79.1619
700.861	-5.69555	-16.0513	-10.7601	-13.6965	-0.23634	-13.7776	63.835	-46.4967	74.3285	-44.5782	68.0681	-1.44791	-0.37237	52.5913	-6.34261	3.46158	3.46158	-22.3603	-36.7169	47.799	70.3577
699.609	-22.4444	2.00619	-37.5065	-73.7473	-10.372	-22.6664	90.7834	-29.1257	67.1486	-35.1916	91.5997	-11.2652	-10.0823	39.9896	6.86787	0.44866	0.44866	-11.3643	-51.7889	72.1463	54.6199
698.357	-30.228	-16.0958	-25.6554	-48.9487	-15.2961	-9.07532	90.399	-29.3081	63.7764	-27.2968	108.278	-4.93895	-25.929	31.0349	13.4863	14.2638	14.2638	2.6514	-3.97661	59.1341	38.4412
697.104	-9.64443	-38.7113	-13.8093	-70.0515	3.21107	-11.667	84.3149	-4.99272	59.6146	-33.2243	115.978	-12.5513	-15.6726	45.5969	19.0006	8.4456	8.4456	-6.01332	17.456	23.9554	19.9446
695.852	-3.99851	-32.7077	6.01217	-57.2326	-45.0828	-7.06969	95.3883	26.325	72.4616	-19.9455	112.178	-2.66156	-22.303	56.5357	22.4109	-1.10791	-1.10791	0.43884	-3.69907	82.1265	-8.39474
694.598	7.61606	-28.2149	-2.09955	-14.4954	16.7861	27.1779	113.379	40.7959	86.9049	-10.0686	118.458	9.57293	41.651	47.0499	15.7253	39.792	39.792	26.5334	-3.55876	66.787	-13.8624
693.344	-1.66505	-8.67385	-0.90166	-22.6279	2.32934	-15.842	96.4411	43.8777	94.9203	4.1379	127.892	21.878	-40.1528	49.7633	9.39237	22.763	22.763	-18.3892	-0.37804	88.7725	-0.31932
692.09	-12.4348	-25.2558	12.2586	-19.7903	-1.71807	-3.1607	72.2561	59.4984	91.6083	4.97835	135.163	12.2886	26.8468	55.5845	14.4152	-2.66394	-2.66394	25.8244	6.85426	82.7655	-8.95605
690.836	8.12019	-32.8049	8.13716	-8.97969	0.30386	37.3516	72.6779	50.9029	71.8777	0.26446	124.548	2.01024	27.8834	66.0029	14.7189	39.1444	39.1444	-5.48783	-22.3808	89.5839	-5.82124
689.582	-2.6514	-11.7728	17.304	25.7432	4.05866	28.4716	91.8834	46.7663	72.1545	2.3498	125.118	-11.1235	-0.20835	76.7683	20.2969	20.2588	20.2588	-6.59016	18.2731	105.723	-3.46771
688.326	0	-5.79052	-0.10093	-0.31809	22.5442	16.0071	97.931	29.4518	56.4251	5.44033	138.186	-8.87395	26.893	80.7487	16.3343	39.6458	39.6458	4.38521	-1.83697	128.848	14.8283
687.072	25.7685	6.20497	23.673	6.49962	10.7034	-2.73534	134.826	26.3659	48.1345	-1.86784	150.602	2.21493	15.6707	74.4839	14.211	17.9682	17.9682	18.3738	-5.74377	118.177	12.4581
685.816	26.1945	-2.85247	24.8636	-9.58691	4.93381	4.55077	136.608	10.812	40.2274	-4.90375	140.491	27.8246	7.51939	68.179	6.66203	42.012	42.012	0.6704	16.6675	158.76	37.2943
684.561	60.8869	-13.4098	18.0882	6.19569	26.0073	13.6282	147.493	22.4121	31.4681	-7.64012	125.064	34.6176	16.2218	91.8268	5.01363	41.7951	41.7951	17.6723	18.8327	107.329	50.357
683.307	79.1807	7.59359	39.1889	-16.8544	60.9194	42.4306	170.6	24.5895	47.3481	-0.06369	124.003	48.6564	8.00161	104.043	6.05915	25.7254	25.7254	15.0588	17.9603	116.462	80.1082
682.049	128.74	-2.96513	36.3941	12.8616	45.629	33.5662	183.33	45.5749	56.1147	8.9835	131.714	55.5249	38.7685	91.666	2.89132	50.6845	50.6845	50.1476	35.2989	140.723	102.16
680.793	136.59	0	44.2146	-4.20527	68.4139	45.3226	166.847	62.9427	57.9283	28.5867	136.726	72.3022	15.942	96.7309	11.8752	62.5834	62.5834	50.5449	16.224	168.466	109.701
679.537	159.323	25.963	66.623	4.60187	55.7212	58.867	157.264	93.635	105.804	40.9069	134.202	83.1987	8.4304	96.5757	31.1412	86.5927	86.5927	58.4789	30.5216	176.417	98.6674
678.281	225.207	26.3922	71.7814	50.2082	55.1435	52.6922	169.963	123.701	135.45	68.0185	133.182	93.4401	52.9499	102.09	59.089	91.9568	91.9568	102.579	56.9435	172.731	103.945
677.023	283.623	61.3465	94.1745	94.8053	112.508	85.0459	187.157	150.277	174.008	99.9293	155.986	107.909	111.221	114.997	78.4225	103.839	103.839	131.594	103.569	201.613	107.724
675.766	282.51	79.7782	143.072	125.465	132.673	129.927	216.001	150.884	217.786	137.223	168.828	145.916	117.461	126.387	99.8328	128.756	128.756	119.924	97.6353	230.482	113.904
674.508	253.137	129.712	168.091	137.226	166.661	203.446	247.046	174.972	278.876	164.403	198.634	216.607	157.343	147.618	113.102	147.144	147.144	148.924	74.5306	220.974	111.095
673.25	150.913	137.621	203.702	192.712	235.203	204.413	310.06	195.822	350.295	200.172	208.1	277.538	198.738	164.843	134.117	160.869	160.869	156.831	165.565	269.588	141.918
671.992	71.0319	160.526	218.1	163.717	215.588	201.798	368.206	235.644	384.795	221.54	219.275	335.296	212.599	200.34	162.116	182.035	182.035	125.592	167.701	276.345	174.42
670.734	17.9398	226.906	270.904	245.998	261.633	261.834	411.947	246.25	400.805	234.728	242.751	366.745	195.889	227.009	177.279	195.748	195.748	204.245	153.684	292.394	225.525
669.477	-2.43572	285.764	328.983	301.428	362.935	359.426	412.952	268.097	384.605	233.318	262.171	366.373	272.394	221.8	173.268	199.219	199.219	209.126	175	277.071	244.061
668.217	-9.42957	284.642	310.246	304.211	298.41	282.532	402.849	258.291	347.297	230.708	256.613	336.855	249.567	216.867	173.017	240.828	240.828	218.519	187.228	332.601	241.144
666.959	37.0566	255.048	304.753	294.082	312.469	275.433	363.494	245.46	317.829	209.776	236.075	303.205	222.167	212.916	159.557	230.339	230.339	160.218	146.984	321.922	240.374
665.699	-42.7163	152.052	189.415	130.11	209.142	201.271	313.547	209.592	248.622	183.874	205.969	240.561	162.71	196.202	151.617	164.063	164.063	142.547	99.6973	242.751	235.626
664.439	9.69729	71.568	92.65	112.088	148.143	148.598	249.813	164.059	167.06	156.92	180.638	177.889	130.76	167.626	119.2	147.086	147.086	139.92	118.994	203.076	220.583
663.18	-15.1075	18.0752	54.1328	40.4953	103.562	91.4782	187.394	121.2	118.45	126.316	155.857	134.041	75.9263	143.597	80.8336	116.174	116.174	93.6982	58.6258	242.329	176.69
661.92	-13.1851	-2.4541	34.1484	1.66872	91.779	57.6177	119.342	90.7185	94.7171	93.2701	132.35	108.774	36.3766	122.891	48.4195	74.1234	74.1234	71.5438	49.6968	153.942	130.057
660.658	-43.9102	-9.50073	22.1064	-18.1671	101.566	34.4954	100.325	57.1589	85.7484	69.7481	106.618	83.8362	33.463	115.146	25.1548	64.6072	64.6072	55.4102	57.9082	105.03	87.3247
659.398	-40.4978	37.3363	33.867	7.91551	24.2598	40.8601	101.616	47.0944	56.2883	42.3033	95.5801	86.0508	33.6013	110.169	18.065	35.5889	35.5889	48.2969	30.8454	133.84	72.9397
658.137	-25.2209	-43.0387	-5.92814	10.1994	36.644	13.286	85.0167	20.1982	51.6154	31.4818	96.5948	88.2279	6.28679	102.905	2.41032	19.5837	19.5837	33.6772	7.82633	111.621	67.0188
656.877	-36.6446	9.77047	24.3348	1.5767	26.6116	10.7239	87.6828	19.2807	51.9384	17.2749	94.9601	77.4296	20.1543	79.213	-17.78	16.5841	16.5841	62.6136	-33.3157	104.481	40.7647
655.615	-45.097	-15.2215	8.34071	17.736	14.0026	14.1414	96.5892	30.7012	53.9845	10.0724	86.1354	71.1295	32.4919	61.7945	-22.4226	21.0116	21.0116	29.98	35.3315	47.5073	23.5682
654.354	-37.2395	-13.2846	-7.64681	-36.4532	43.6138	5.7714	105.176	38.6694	43.3495	-9.393	63.1748	59.2268	35.6792	59.6506	-16.0468	-17.2413	-17.2413	-14.6488	8.29976	40.3835	12.5382
653.092	-32.3492	-44.2416	1.46584	-20.291	0	-11.5187	97.5977	26.7796	24.6947	-9.88303	38.8051	55.4796	-8.37583	38.4527	-2.47725	-4.34327	-4.34327	3.77511	9.46559	77.2864	12.9291
651.828	-33.3879	-40.8035	0.01103	-34.8307	19.2811	-9.17212	95.4318	45.4609	-7.28537	-17.2138	27.7254	52.0426	-18.8932	21.202	5.51416	-5.36639	-5.36639	-1.81564	-2.53823	44.677	34.4724
650.566	-25.5372	-25.4112	-41.0481	-28.575	6.69621	7.44453	85.1115	62.5156	-5.29931	-18.6039	16.7107	21.6868	5.62847	11.1343	8.40459	1.03102	1.03102	-20.9064	-21.631	16.7613	31.1286
649.305	-23.6143	-36.9211	-24.0151	-26.2809	14.7761	-5.37547	64.6658	52.4296	10.2292	-14.5701	6.54279	13.5235	-14.0255	7.30434	9.91785	-31.5217	-31.5217	-23.4904	-25.6252	6.46479	23.4382
648.041	-43.9039	-45.4374	-17.5462	-42.787	-27.9211	-5.70599	54.1565	48.0941	11.5457	-15.0468	3.39496	-2.72664	4.39487	9.81239	11.2372	-20.4861	-20.4861	35.4094	43.808	33.2147	31.922
646.777	-50.8608	-37.5205	-20.3156	-42.4641	5.11852	-31.888	46.7208	45.4354	18.6047	-12.8599	10.1667	-7.45663	3.01758	9.6034	8.89049	-20.5782	-20.5782	-10.6623	-2.43042	14.8183	56.3687
645.514	-75.5765	-32.5933	-17.8075	-2.56854	8.03559	-31.3213	29.64	30.2306	31.5703	-12.2767	22.3429	-3.07458	-36.4089	7.73811	-11.4458	-28.0844	-28.0844	-4.25211	-34.5737	-12.8271	89.0186
644.25	-30.7257	-33.6399	-7.38795	-52.6958	-3.66934	1.32392	46.5337	24.9856	29.785	-12.4491	31.894	4.05661	1.7864	5.45946	-25.9003	-15.2034	-15.2034	-27.8167	11.7	-5.75596	109.199
642.986	-28.8021	-25.7299	-10.1579	-24.6796	19.0267	-0.78882	43.25	35.8093	30.1078	-11.7134	37.6614	24.9646	30.8376	13.7239	-25.5074	-5.10695	-5.10695	16.0523	-9.37757	20.9742	105.867
641.723	-29.8377	-23.7925	-18.1996	-53.0288	54.6095	-27.84	49.7321	28.9115	36.676	-22.6517	51.2961	26.8134	-40.5117	19.8956	-16.1313	-14.4641	-14.4641	-19.4904	-14.37	26.8789	104.07
640.457	-20.5191	-44.2352	1.43884	-13.1569	0.78848	-5.00991	35.5668	18.8361	29.0026	-25.9607	55.6565	37.2532	6.78532	20.3518	-11.205	-8.07602	-8.07602	-16.0777	-6.29899	9.65958	97.1793
639.193	-17.1197	-51.2447	-47.4502	-45.4479	4.56482	-32.9388	43.5452	19.3136	9.62516	-38.0063	60.3617	30.7497	-20.4374	15.9748	-6.5867	-11.8741	-11.8741	11.2908	-11.2892	13.2525	72.3911
637.928	-27.026	-76.1469	-21.2269	2.31178	-55.2367	5.01538	40.9667	16.3816	21.3572	-32.9706	44.2353	3.21911	0.99416	3.24596	-13.9747	-26.7776	-26.7776	-0.27458	2.80321	-10.8905	39.3581
636.662	-25.1044	-30.9576	-5.55181	-42.8051	-23.9592	-11.3331	56.5128	4.37692	23.8862	-26.1192	19.45	1.96787	-0.37954	1.50842	-5.28902	-4.65973	-4.65973	12.1128	-8.20759	-9.6051	1.34023
635.396	-52.7374	-29.0195	-39.9236	-3.95303	8.16436	5.24671	61.2967	7.25695	32.2134	-30.4699	2.47834	-7.08408	14.9611	-8.26771	-7.0353	-24.1846	-24.1846	-14.4118	26.9566	27.4888	-7.8886
634.131	-22.7389	-30.0629	-3.18607	-72.7462	-6.09135	4.02821	58.5236	16.2408	54.1821	-26.2003	-14.6692	-14.3851	-3.12526	-15.7809	-20.9688	-39.0763	-39.0763	9.94248	-18.1724	-8.1908	-9.16097
632.863	-11.9554	-20.674	-24.3812	0.65433	46.6209	10.816	78.6714	13.8905	45.4005	-33.6782	-28.8656	-12.5257	4.61599	-25.4478	-25.64	-16.0451	-16.0451	-31.5273	-41.2082	17.3412	-2.53712
631.598	15.0685	-17.2489	-17.931	-14.8104	16.0567	-30.4168	102.861	13.8005	26.4926	-26.052	-29.2518	3.38099	-27.1269	-15.5628	-27.5557	-11.5158	-11.5158	13.7573	-11.0734	-35.6373	28.237
630.33	-6.64228	-27.23	0.35796	-4.60673	-12.7757	-11.1781	90.5993	19.3271	28.6896	-26.2802	-24.5568	23.2902	-28.4928	-8.1958	-30.3743	-18.0813	-18.0813	-0.78274	-25.0745	-6.64779	14.8639
629.064	2.65526	-25.2938	-24.7711	-53.6064	-14.1447	-1.72543	89.2277	25.6976	34.7761	-23.0267	2.84961	44.4409	-14.6801	6.86435	-26.929	-23.7199	-23.7199	16.0745	-3.97884	33.8682	37.2325
627.797	-8.71229	-53.1354	-3.85818	15.7863	50.5348	-1.16193	63.606	26.1122	20.229	-20.3668	12.3037	50.2944	-46.3984	21.9073	-32.7112	-38.5964	-38.5964	-10.4158	-23.9894	5.14728	40.5599
626.529	-31.8793	-22.9105	-11.8821	-20.3709	38.0078	26.0551	68.8058	25.3793	9.70608	-7.41956	23.017	39.1301	-17.4152	26.7104	-40.9528	-11.8946	-11.8946	-5.51626	15.1397	28.3427	53.1941
625.262	-6.3534	-12.0457	-13.3297	21.3798	62.3536	-22.2416	61.8772	29.0055	19.768	16.6038	29.1702	34.8788	-9.68062	34.7825	-48.2746	-37.851	-37.851	-8.08818	10.1644	16.9328	79.5563
623.994	14.7371	15.1822	-12.1479	-17.7188	60.9737	3.19256	66.7282	21.2596	16.2321	35.5037	24.833	29.3386	-17.1149	30.5302	-39.1842	-29.6294	-29.6294	2.78344	-30.873	22.8218	100.678
622.725	3.37722	-6.69241	8.74423	-23.2872	-5.53526	7.30802	60.6715	20.4499	6.59282	27.3792	30.4861	27.8391	2.74681	19.1136	-33.372	-19.5649	-19.5649	9.17151	5.23105	62.1371	112.461
621.457	15.6112	2.6753	-9.78637	4.6456	5.09616	14.0838	49.261	29.2421	-1.55612	21.9152	24.2974	33.2334	2.89266	12.1958	-26.5794	-9.50474	-9.50474	11.0774	8.27312	19.611	110.054
620.188	4.25707	-8.77805	17.6639	3.01718	29.4322	11.983	51.6129	26.6484	-15.2937	-1.98685	17.9247	38.3884	12.1326	-9.53748	-12.183	-8.67737	-8.67737	9.99818	-14.714	54.3014	88.5948
618.918	-8.56655	-32.1199	10.9582	56.5466	51.1889	32.0663	76.2881	35.792	-14.1787	-16.3139	20.3984	42.6622	-16.5135	0.38135	-9.9158	-4.15982	-4.15982	19.3658	17.3611	49.8102	86.1154
617.648	9.55689	-6.40135	16.0719	25.3679	33.5478	49.48	76.1659	47.0592	5.9247	-38.7714	22.2431	53.0512	13.9361	2.87622	-0.20785	-12.5587	-12.5587	7.84153	0.38691	31.5003	42.4242
616.379	9.99618	14.8483	34.3103	71.9801	44.1659	43.8256	72.4338	55.1865	19.1673	-41.9064	17.1701	62.4689	35.2849	8.7738	8.57524	-9.88684	-9.88684	33.6145	18.4386	50.0455	32.9658
615.109	23.6901	3.4027	30.2298	0.4565	48.7885	44.3813	69.2755	45.6153	53.8674	-40.7467	17.1489	58.4169	-0.91939	16.3162	-1.02208	21.3679	21.3679	-18.1747	-31.5381	28.2895	14.1725
613.84	10.8747	15.729	40.5845	35.2467	53.4096	52.9159	79.1574	56.5128	97.3151	-31.7186	16.679	56.9862	-29.5384	28.0551	-11.1454	-16.5311	-16.5311	21.0126	-26.4878	65.2434	24.3557
612.568	5.4262	4.2892	46.999	19.8487	76.8536	51.6981	73.1429	43.3704	121.16	-9.76305	17.1621	54.3496	-8.19342	31.2943	-18.4416	-21.2338	-21.2338	42.2954	26.5572	81.4685	29.6914
611.299	26.4718	-8.6312	24.5562	24.1276	66.0708	72.6347	69.2109	30.3067	120.763	1.77006	26.9709	55.373	-23.1785	26.5373	-21.8183	-15.7982	-15.7982	36.7408	-22.3886	55.1177	21.3603
610.027	26.9086	9.62902	27.0373	29.3932	75.8198	52.8073	67.409	25.626	103.294	5.83686	29.1281	53.8538	-6.38297	41.2384	-18.3704	6.21803	6.21803	23.739	43.6268	56.3847	14.5863
608.756	49.4121	10.0716	15.0961	7.12599	40.2496	69.3071	53.5915	22.171	85.9762	7.15261	28.2211	60.523	27.0451	51.579	-14.2878	7.96094	7.96094	50.9672	27.676	68.0013	13.1242
607.484	79.2613	23.8689	25.4424	17.3099	39.7429	22.9202	37.7799	13.6909	69.7969	-0.4887	14.2721	55.1597	-1.54883	46.2247	-11.53	-2.26857	-2.26857	20.0945	-16.2407	48.5691	24.0054
606.213	113.51	10.9567	3.02277	3.90219	79.4052	35.8779	52.3892	15.367	68.057	1.04913	6.42494	61.0698	-5.93762	64.8215	-6.08752	26.1755	26.1755	27.9531	15.7724	27.9957	45.9129
604.939	149.213	5.46716	22.5382	24.8971	36.1702	18.7328	56.2044	19.8616	74.5922	4.04321	6.32489	62.8412	38.0518	73.4745	12.7735	14.1052	14.1052	14.9656	26.8032	63.7462	47.8618
603.668	186.373	26.6716	57.7642	51.7747	45.9174	56.4682	52.1053	24.7372	80.9715	15.4731	-3.24462	60.8346	36.6794	75.282	30.8421	6.64167	6.64167	33.2419	20.855	43.1782	62.2877
602.395	222.046	27.1117	48.4478	66.859	78.7237	52.5995	68.3663	40.6094	125.395	40.2071	18.9173	79.9756	68.5522	84.7102	41.5753	33.2252	33.2252	23.2354	29.8845	73.1663	76.5026
601.123	176.895	49.7851	86.2717	74.0777	107.245	58.463	84.8453	74.0785	154.791	66.3169	28.9566	119.375	70.1954	90.8765	46.408	56.1177	56.1177	72.7482	80.8235	68.6847	99.8667
599.85	196.396	79.8595	90.0437	93.0799	105.021	130.663	118.062	94.9617	171.874	98.3773	43.7785	146.892	79.3906	88.734	64.3459	75.3214	75.3214	56.7875	86.8438	97.5062	130.227
598.576	164.488	114.366	137.004	128.762	123.285	131.203	140.136	127.22	195.832	128.322	64.7631	179.971	99.1528	91.4933	84.4883	102.793	102.793	57.1936	81.8887	145.832	137.987
597.303	110.568	150.34	174.784	182.094	158.609	187.443	160.59	157.3	228.409	155.861	69.3748	210.148	161.181	108.438	103.249	95.3176	95.3176	90.3123	87.9069	143.634	180.304
596.027	75.7553	187.78	251.795	210.879	199.892	221.561	169.943	178.876	244.24	174.695	81.6023	234.933	208.089	116.639	120.27	123.692	123.692	139.77	122.841	154.06	195.831
594.754	84.9893	223.722	209.75	219.049	196.799	222.966	185.686	183.99	240.701	182.249	81.527	257.015	165.935	114.724	129.685	136.432	136.432	113.406	101.932	139.241	214.733
593.479	44.3289	178.23	216.106	205.643	215.031	235.857	202.377	173.458	229.889	178.947	95.1619	255.265	155.485	113.246	128.936	126.198	126.198	140.548	83.028	151.958	216.845
592.205	12.4877	197.879	201.541	200.084	205.117	172.772	202.596	166.97	202.171	156.935	83.1497	237.976	181.244	122.47	126.765	126.991	126.991	157.279	100.004	149.76	187.042
590.93	17.3303	165.729	128.163	163.162	144.914	155.641	196.016	141.801	175.201	128.592	59.9015	204.139	119.517	111.948	117.69	101.151	101.151	124.987	75.1309	97.1139	168.667
589.654	-2.75859	111.402	156.748	153.701	187.01	142.049	171.324	123.043	156.318	109.889	54.3771	166.552	107.576	95.8183	93.9559	85.4225	85.4225	86.7689	62.2218	138.49	142.571
588.379	-12.5758	76.327	101.702	78.5898	109.796	74.6124	158.569	101.855	116.953	83.2807	26.475	133.838	63.9819	79.3083	65.1832	61.4388	61.4388	67.8685	38.3644	115.667	103.823
587.104	6.92778	85.6307	84.5618	88.7457	105.027	47.805	142.15	83.9081	87.7381	59.1728	8.19877	95.4852	30.9569	58.8964	49.8496	33.7943	33.7943	48.9764	52.3514	65.3539	102.714
585.826	-10.2144	44.6634	16.4949	75.3945	55.1222	42.1885	101.362	67.7692	51.7354	39.5917	-26.5888	59.9304	62.7432	33.8864	32.0014	21.7599	21.7599	37.5136	46.4265	78.0706	77.9769
584.551	-5.37056	12.582	5.90811	-3.5656	34.1891	23.3399	76.1084	59.102	35.8962	28.6644	-33.2919	47.874	10.1472	29.646	22.773	6.06128	6.06128	29.0227	38.5122	49.5487	74.9125
583.273	-28.3619	17.4611	-19.0339	12.4825	0.49715	49.4848	75.6374	50.8183	23.579	21.8115	-30.1813	34.773	-18.3258	7.75873	8.31957	7.79528	7.79528	35.3706	-2.23096	31.3454	59.3236
581.996	-22.0513	-2.77941	0.40945	45.1652	26.4027	10.3618	91.5296	53.0422	-7.83041	12.7834	-28.9	32.3751	17.9685	0.56579	9.35519	4.02669	4.02669	1.67196	39.6097	52.0751	51.2388
580.719	-11.3505	-12.6707	-23.216	-4.3714	17.4066	-22.5727	78.4903	40.0027	-39.8455	6.87273	-12.4295	12.7231	-8.98832	-11.175	13.1276	-4.32418	-4.32418	2.09216	5.84657	15.5653	32.2453
579.441	-24.0769	6.98006	4.04718	48.8496	22.0278	11.499	58.27	36.3915	-57.583	-0.32138	-26.7619	22.843	-11.849	6.24054	0.44388	-16.3377	-16.3377	8.44225	19.8267	42.0113	0.10234
578.164	12.9648	-10.2915	-10.439	54.1157	-24.3902	39.3873	64.2572	16.0509	-53.4174	-7.53078	-38.1716	21.1497	10.8759	-8.04263	-2.48425	-14.6007	-14.6007	10.3432	24.854	24.9694	-16.4329
576.885	-8.54077	-5.4111	-32.7431	28.0882	20.212	-12.9145	61.5566	15.5535	-56.9838	-11.372	-52.8203	13.8204	-11.5476	-7.42911	-10.7006	-4.61901	-4.61901	-1.09218	-9.875	53.6901	-10.8363
575.607	-9.55527	-28.5759	-12.0144	-5.75371	29.0821	-2.65073	48.386	10.5283	-69.0714	-4.94372	-74.9775	7.52467	27.7148	-6.87297	-18.4177	-33.1124	-33.1124	2.29188	25.962	14.9241	9.88975
574.328	-1.79249	-22.2177	-23.8812	-19.0467	-30.0549	-32.9027	38.7677	5.56782	-68.7342	-7.27794	-86.1613	19.6886	-23.2783	4.60089	-31.2502	-35.0363	-35.0363	23.4497	0.18979	19.6237	41.7822
573.049	-1.34458	-11.4362	-12.2859	-3.98915	51.9162	-12.9518	22.3712	10.9712	-68.7553	-4.51102	-87.7528	24.4147	-20.1177	5.8397	-42.5271	-18.6478	-18.6478	13.5002	-16.6315	46.0406	69.7588
571.77	-3.8215	-24.2587	-33.2678	-30.9552	11.4941	1.70867	42.7094	14.4497	-41.8232	-0.10727	-81.6736	25.6512	-25.9784	15.5651	-43.7491	-21.4894	-21.4894	15.3996	-24.5076	34.7309	83.9825
570.49	-6.29642	13.0626	-4.74177	24.1554	44.1491	29.5651	57.7002	29.0358	-27.6339	2.4505	-86.5637	25.7634	2.73265	5.64907	-39.1813	-26.1602	-26.1602	26.1796	-3.58757	42.8511	115.947
569.211	-20.4611	-8.60522	-10.0886	-1.82662	16.4872	-3.30687	63.6352	49.9019	-21.2064	4.88868	-85.1475	31.6184	-6.13583	3.90712	-24.1314	-5.20954	-5.20954	-1.52252	32.2131	37.2589	106.061
567.932	6.29104	-9.62738	-12.8291	13.2178	17.709	9.58298	44.2564	48.1826	-4.07146	11.4017	-62.8647	37.502	33.0749	12.2137	-13.6087	-36.4107	-36.4107	10.7364	21.3555	39.6641	81.7522
566.65	24.2665	-1.80602	-39.0002	-0.05256	18.0839	-2.15931	21.8712	44.5565	16.814	12.9868	-61.9469	40.3708	-20.8567	14.9122	-12.4024	-19.1254	-19.1254	8.19829	0.58287	35.2174	55.0559
565.369	1.34308	-1.35472	-17.0055	-34.7907	2.33217	8.96745	36.0128	47.5493	37.4196	11.333	-69.1087	37.7278	-11.6934	1.53696	9.16772	-30.1937	-30.1937	13.0562	3.62711	53.6055	21.4333
564.09	47.0541	-3.85034	-44.4656	-36.3364	2.70883	-22.1124	40.9203	51.7194	27.8045	12.4239	-89.1127	36.8745	-4.03586	-1.55013	18.2595	-26.6303	-26.6303	-7.22549	17.578	38.8846	15.9656
562.809	12.4578	-6.34394	-12.0722	-9.5816	-10.4866	5.7151	18.3762	37.3581	21.8679	15.3547	-94.5702	38.5517	-15.8949	-10.849	33.6696	3.43729	3.43729	-3.8444	-40.858	43.5701	7.69618
561.527	-3.15022	-20.6155	-8.30665	4.48126	6.86052	-6.89427	14.2663	23.9982	3.2494	2.49771	-83.5997	48.0787	-36.7531	-7.52128	29.0285	-9.45649	-9.45649	23.1831	20.6831	58.5216	-19.1179
560.244	-1.2414	6.33852	-5.84334	2.93876	43.7081	-10.7107	11.2064	25.8138	-4.06616	5.30842	-70.1628	30.6547	-5.08779	-7.66349	31.5731	-34.2215	-34.2215	1.43688	-2.04526	39.2475	-13.3088
558.963	-12.4627	24.4496	-0.78094	-1.53121	-7.64049	-21.5538	17.2045	27.6774	-6.4053	1.31118	-87.2176	10.3042	-6.43831	6.39745	35.1797	-5.99889	-5.99889	-1.09505	20.8162	63.3167	-25.7025
557.68	15.7017	1.35321	14.6773	30.0745	-30.1427	5.37305	-0.79696	45.7343	-9.40364	3.93181	-82.4455	13.4229	17.7079	5.41912	28.0683	-7.92414	-7.92414	30.3465	21.875	73.6939	-25.5275
556.398	4.48186	47.4092	26.2302	8.05909	10.0777	19.1166	8.06177	52.2536	-3.13572	6.2857	-83.8269	17.884	-12.1359	7.00159	21.4769	16.6283	16.6283	11.566	18.9699	54.4285	-24.8485
555.115	-9.64784	12.5518	2.69929	44.5228	11.3069	3.00866	15.9762	62.3106	10.2903	7.72897	-79.1801	13.6611	-29.9736	20.4479	-0.70573	-29.1154	-29.1154	35.6095	-24.5321	86.4566	-18.3405
553.832	-20.8561	-3.17399	-18.2236	22.5196	-11.1835	9.72697	5.79597	58.3989	9.10813	10.5652	-100.85	14.7815	6.15204	14.1357	-7.43685	-6.3944	-6.3944	18.3131	2.27799	53.5243	-0.54825
552.549	0	-1.25077	2.41909	-3.36883	5.2957	-8.12649	17.7863	59.1563	7.14472	15.2041	-103.727	10.175	-28.1646	12.8236	-4.1143	-12.8801	-12.8801	2.50012	-3.5874	42.2505	1.54232
551.266	41.2439	-12.5568	-32.7768	16.5221	1.44589	2.97805	17.4912	46.461	4.42929	15.9203	-100.622	8.03015	-5.53811	6.74483	1.73415	-0.20698	-0.20698	10.3008	10.3423	52.6208	10.8951
549.98	11.0966	15.8202	-31.6113	16.9381	-15.0981	-5.21674	22.0855	29.9386	-3.71801	11.3381	-96.8171	12.1472	-47.3257	9.75385	7.84945	3.34055	3.34055	37.2751	-5.41345	32.2432	13.3253
548.697	--	4.51568	-43.4243	15.4041	-28.2512	-19.5471	33.8186	6.06358	-25.9044	3.37761	-91.4457	18.9057	-18.715	-3.80014	9.58513	-14.9967	-14.9967	2.29688	0.59796	13.0124	-2.96646
547.412	--	-9.72065	-20.1995	12.9026	-5.00911	-26.8563	41.4023	2.49715	-34.2506	7.47618	-94.0209	17.0295	-14.0704	-9.65941	10.5331	-7.80122	-7.80122	41.057	-5.25846	27.9354	5.88916
546.127	--	-21.0135	-19.0379	29.8616	-54.5343	-18.385	48.2899	4.43525	-40.5379	15.1496	-99.3621	12.9859	-33.3767	-15.0334	11.5261	-6.98875	-6.98875	1.67189	-16.0556	40.5761	19.8942
544.842	--	0	-23.0646	-1.82132	0	-9.04102	54.4814	11.8779	-44.7664	26.398	-107.469	6.77485	-25.738	-19.9222	12.5642	-17.1111	-17.1111	-12.6412	6.76206	3.15376	39.0487
543.557	--	41.5552	-19.3096	-2.36971	-2.99312	-11.9666	59.977	24.825	-46.9361	41.2213	-118.343	-1.60355	-3.14127	-24.3257	13.6473	14.6768	14.6768	5.46847	0.90935	47.642	63.3526
542.271	--	11.1804	0	0	-18.6665	0	64.7765	43.2767	-47.047	59.6195	-131.982	-12.1494	0	-28.244	14.7755	0	0	0	0	0	92.806
